# Supplementary material
Source: publisher figshare collection journal article supplement (https://acs.figshare.com/ndownloader/files/3955864)
Supplement: Supplementary file 1 [file 3955864]

# ------ Material relevant to the Complex 2 ------ 

data_shelxl
 
_audit_creation_method            SHELXL-97
_chemical_name_systematic
;
 ?
;
_chemical_name_common             ‘Complex 2’
_chemical_melting_point           ?
_chemical_formula_moiety          ?
_chemical_formula_sum
 'C39 H60 Cl N4 P3 Th'
_chemical_formula_weight          945.31
 
loop_
 _atom_type_symbol
 _atom_type_description
 _atom_type_scat_dispersion_real
 _atom_type_scat_dispersion_imag
 _atom_type_scat_source
 'C'  'C'   0.0033   0.0016
 'International Tables Vol C Tables 4.2.6.8 and 6.1.1.4'
 'H'  'H'   0.0000   0.0000
 'International Tables Vol C Tables 4.2.6.8 and 6.1.1.4'
 'N'  'N'   0.0061   0.0033
 'International Tables Vol C Tables 4.2.6.8 and 6.1.1.4'
 'P'  'P'   0.1023   0.0942
 'International Tables Vol C Tables 4.2.6.8 and 6.1.1.4'
 'Cl'  'Cl'   0.1484   0.1585
 'International Tables Vol C Tables 4.2.6.8 and 6.1.1.4'
 'Th'  'Th'  -7.2400   8.8979
 'International Tables Vol C Tables 4.2.6.8 and 6.1.1.4'
 
_symmetry_cell_setting            Triclinic
_symmetry_space_group_name_H-M    P-1
 
loop_
 _symmetry_equiv_pos_as_xyz
 'x, y, z'
 '-x, -y, -z'
 
_cell_length_a                    11.5293(10)
_cell_length_b                    12.2573(10)
_cell_length_c                    16.7699(14)
_cell_angle_alpha                 94.757(4)
_cell_angle_beta                  101.488(4)
_cell_angle_gamma                 115.104(4)
_cell_volume                      2065.3(3)
_cell_formula_units_Z             2
_cell_measurement_temperature     100(2)
_cell_measurement_reflns_used     9446
_cell_measurement_theta_min       2.31
_cell_measurement_theta_max       25.38
 
_exptl_crystal_description        needle
_exptl_crystal_colour             colorless
_exptl_crystal_size_max           0.09
_exptl_crystal_size_mid           0.05
_exptl_crystal_size_min           0.03
_exptl_crystal_density_meas       a
_exptl_crystal_density_diffrn     1.520
_exptl_crystal_density_method     'not measured'
_exptl_crystal_F_000              948
_exptl_absorpt_coefficient_mu     3.822
_exptl_absorpt_correction_type    multi-scan
_exptl_absorpt_correction_T_min   0.7248
_exptl_absorpt_correction_T_max   0.8940
_exptl_absorpt_process_details    SADABS
 
_exptl_special_details
;
 ?
;
 
_diffrn_ambient_temperature       100(2)
_diffrn_radiation_wavelength      0.71073
_diffrn_radiation_type            MoK\a
_diffrn_radiation_source          'fine-focus sealed tube'
_diffrn_radiation_monochromator   'QUAZAR multilayer mirrors'
_diffrn_measurement_device_type   'Bruker APEX-II CCD'
_diffrn_measurement_method        '\f and \w scans'
_diffrn_detector_area_resol_mean  8.366
_diffrn_reflns_number             27508
_diffrn_reflns_av_R_equivalents   0.0902
_diffrn_reflns_av_sigmaI/netI     0.1138
_diffrn_reflns_limit_h_min        -12
_diffrn_reflns_limit_h_max        13
_diffrn_reflns_limit_k_min        -13
_diffrn_reflns_limit_k_max        14
_diffrn_reflns_limit_l_min        -20
_diffrn_reflns_limit_l_max        20
_diffrn_reflns_theta_min          1.26
_diffrn_reflns_theta_max          25.49
_reflns_number_total              7520
_reflns_number_gt                 5789
_reflns_threshold_expression      >2sigma(I)
 
_computing_data_collection        'Bruker APEX2'
_computing_cell_refinement        'Bruker SAINT'
_computing_data_reduction         'Bruker SAINT'
_computing_structure_solution     'SHELXS-97 (Sheldrick, 2008)'
_computing_structure_refinement   'SHELXL-97 (Sheldrick, 2008)'
_computing_molecular_graphics     'ORTEP-32'
_computing_publication_material   'WinGX'
 
_refine_special_details
;
 Refinement of F^2^ against ALL reflections.  The weighted R-factor wR and
 goodness of fit S are based on F^2^, conventional R-factors R are based
 on F, with F set to zero for negative F^2^. The threshold expression of
 F^2^ > 2sigma(F^2^) is used only for calculating R-factors(gt) etc. and is
 not relevant to the choice of reflections for refinement.  R-factors based
 on F^2^ are statistically about twice as large as those based on F, and R-
 factors based on ALL data will be even larger.
;
 
_refine_ls_structure_factor_coef  Fsqd
_refine_ls_matrix_type            full
_refine_ls_weighting_scheme       calc
_refine_ls_weighting_details
 'calc w=1/[\s^2^(Fo^2^)+(0.0232P)^2^+0.0000P] where P=(Fo^2^+2Fc^2^)/3'
_atom_sites_solution_primary      direct
_atom_sites_solution_secondary    difmap
_atom_sites_solution_hydrogens    geom
_refine_ls_hydrogen_treatment     constr
_refine_ls_extinction_method      none
_refine_ls_extinction_coef        ?
_refine_ls_number_reflns          7520
_refine_ls_number_parameters      445
_refine_ls_number_restraints      168
_refine_ls_R_factor_all           0.0766
_refine_ls_R_factor_gt            0.0470
_refine_ls_wR_factor_ref          0.0743
_refine_ls_wR_factor_gt           0.0666
_refine_ls_goodness_of_fit_ref    1.006
_refine_ls_restrained_S_all       0.996
_refine_ls_shift/su_max           0.002
_refine_ls_shift/su_mean          0.000
 
loop_
 _atom_site_label
 _atom_site_type_symbol
 _atom_site_fract_x
 _atom_site_fract_y
 _atom_site_fract_z
 _atom_site_U_iso_or_equiv
 _atom_site_adp_type
 _atom_site_occupancy
 _atom_site_symmetry_multiplicity
 _atom_site_calc_flag
 _atom_site_refinement_flags
 _atom_site_disorder_assembly
 _atom_site_disorder_group
C1 C 1.1276(6) 0.9281(5) 0.9011(3) 0.0132(13) Uani 1 1 d U . .
C00Y C 1.2217(6) 0.8594(5) 0.7471(3) 0.0129(14) Uani 1 1 d U . .
C2 C 1.1712(6) 1.0102(5) 0.9760(3) 0.0192(15) Uani 1 1 d U . .
H2 H 1.1275 1.0591 0.9844 0.023 Uiso 1 1 calc R . .
C3 C 1.2772(6) 1.0216(5) 1.0382(4) 0.0246(16) Uani 1 1 d U . .
H3 H 1.3059 1.0785 1.0885 0.030 Uiso 1 1 calc R . .
C4 C 1.3409(6) 0.9508(5) 1.0273(4) 0.0223(16) Uani 1 1 d U . .
H4 H 1.4107 0.9559 1.0710 0.027 Uiso 1 1 calc R . .
C5 C 1.3034(6) 0.8728(5) 0.9532(3) 0.0176(15) Uani 1 1 d U . .
H5 H 1.3485 0.8251 0.9455 0.021 Uiso 1 1 calc R . .
C6 C 1.2005(6) 0.8630(5) 0.8898(3) 0.0133(13) Uani 1 1 d U . .
C7 C 0.9640(6) 0.9901(5) 0.8308(4) 0.0205(15) Uani 1 1 d U . .
H7A H 1.0337 1.0750 0.8543 0.025 Uiso 1 1 calc R . .
H7B H 0.8928 0.9708 0.8599 0.025 Uiso 1 1 calc R . .
C8 C 0.7541(6) 1.0041(5) 0.7111(4) 0.0210(15) Uani 1 1 d U . .
H8 H 0.6906 0.9406 0.7356 0.025 Uiso 1 1 calc R . .
C9 C 0.6804(6) 0.9885(6) 0.6211(4) 0.0343(19) Uani 1 1 d U . .
H9A H 0.5965 0.9918 0.6196 0.051 Uiso 1 1 calc R . .
H9B H 0.6623 0.9092 0.5901 0.051 Uiso 1 1 calc R . .
H9C H 0.7352 1.0546 0.5961 0.051 Uiso 1 1 calc R . .
C10 C 0.7878(6) 1.1288(5) 0.7613(4) 0.0260(16) Uani 1 1 d U . .
H10A H 0.8452 1.1945 0.7371 0.039 Uiso 1 1 calc R . .
H10B H 0.8339 1.1359 0.8187 0.039 Uiso 1 1 calc R . .
H10C H 0.7059 1.1356 0.7602 0.039 Uiso 1 1 calc R . .
C11 C 1.0048(8) 1.0732(9) 0.5948(5) 0.090(4) Uani 1 1 d U . .
H11A H 1.0652 1.1450 0.5767 0.135 Uiso 1 1 calc R . .
H11B H 0.9130 1.0508 0.5655 0.135 Uiso 1 1 calc R . .
H11C H 1.0246 1.0044 0.5824 0.135 Uiso 1 1 calc R . .
C12 C 1.0229(7) 1.1035(6) 0.6880(5) 0.041(2) Uani 1 1 d U . .
H12 H 1.0068 1.1764 0.7002 0.049 Uiso 1 1 calc R . .
C13 C 1.1629(6) 1.1356(6) 0.7316(4) 0.0391(19) Uani 1 1 d U . .
H13A H 1.1800 1.0648 0.7200 0.059 Uiso 1 1 calc R . .
H13B H 1.1767 1.1577 0.7914 0.059 Uiso 1 1 calc R . .
H13C H 1.2238 1.2052 0.7118 0.059 Uiso 1 1 calc R . .
C14 C 1.1464(6) 0.8154(5) 0.6634(3) 0.0145(14) Uani 1 1 d U . .
C15 C 1.2063(6) 0.8724(5) 0.6034(3) 0.0140(14) Uani 1 1 d U . .
H15 H 1.1610 0.8427 0.5463 0.017 Uiso 1 1 calc R . .
C16 C 1.3320(6) 0.9723(5) 0.6269(4) 0.0175(15) Uani 1 1 d U . .
H16 H 1.3715 1.0103 0.5857 0.021 Uiso 1 1 calc R . .
C17 C 1.3993(6) 1.0164(5) 0.7087(4) 0.0216(16) Uani 1 1 d U . .
H17 H 1.4837 1.0861 0.7242 0.026 Uiso 1 1 calc R . .
C18 C 1.3430(6) 0.9583(5) 0.7690(4) 0.0173(15) Uani 1 1 d U . .
H18 H 1.3897 0.9880 0.8258 0.021 Uiso 1 1 calc R . .
C19 C 0.9488(5) 0.6648(5) 0.5622(3) 0.0161(14) Uani 1 1 d U . .
H19A H 0.9971 0.6264 0.5378 0.019 Uiso 1 1 calc R . .
H19B H 0.9393 0.7248 0.5288 0.019 Uiso 1 1 calc R . .
C20 C 0.6731(6) 0.5539(5) 0.4739(3) 0.0172(14) Uani 1 1 d U . .
H20 H 0.5828 0.4867 0.4695 0.021 Uiso 1 1 calc R . .
C21 C 0.7072(6) 0.5322(6) 0.3922(3) 0.0261(17) Uani 1 1 d U . .
H21A H 0.6446 0.5394 0.3466 0.039 Uiso 1 1 calc R . .
H21B H 0.7013 0.4498 0.3826 0.039 Uiso 1 1 calc R . .
H21C H 0.7976 0.5933 0.3953 0.039 Uiso 1 1 calc R . .
C22 C 0.6640(6) 0.6747(5) 0.4874(4) 0.0193(15) Uani 1 1 d U . .
H22A H 0.7483 0.7429 0.4867 0.029 Uiso 1 1 calc R . .
H22B H 0.6453 0.6866 0.5411 0.029 Uiso 1 1 calc R . .
H22C H 0.5925 0.6721 0.4432 0.029 Uiso 1 1 calc R . .
C23 C 0.7936(6) 0.4019(5) 0.5404(4) 0.0183(15) Uani 1 1 d U . .
H23 H 0.8240 0.4020 0.4885 0.022 Uiso 1 1 calc R . .
C24 C 0.6569(6) 0.2923(5) 0.5256(4) 0.0259(17) Uani 1 1 d U . .
H24A H 0.6646 0.2159 0.5159 0.039 Uiso 1 1 calc R . .
H24B H 0.5960 0.2957 0.4770 0.039 Uiso 1 1 calc R . .
H24C H 0.6227 0.2950 0.5743 0.039 Uiso 1 1 calc R . .
C25 C 0.8948(6) 0.3926(5) 0.6108(4) 0.0238(16) Uani 1 1 d U . .
H25A H 0.8642 0.3888 0.6615 0.036 Uiso 1 1 calc R . .
H25B H 0.9808 0.4648 0.6204 0.036 Uiso 1 1 calc R . .
H25C H 0.9040 0.3183 0.5955 0.036 Uiso 1 1 calc R . .
C26 C 1.0801(6) 0.5727(5) 0.8181(3) 0.0163(14) Uani 1 1 d U . .
C27 C 1.1033(6) 0.4708(5) 0.8251(3) 0.0197(15) Uani 1 1 d U . .
H27 H 1.0358 0.3982 0.8342 0.024 Uiso 1 1 calc R . .
C28 C 1.2214(7) 0.4725(5) 0.8192(3) 0.0229(16) Uani 1 1 d U . .
H28 H 1.2329 0.4006 0.8227 0.028 Uiso 1 1 calc R . .
C29 C 1.3235(6) 0.5773(6) 0.8082(3) 0.0256(16) Uani 1 1 d U . .
H29 H 1.4055 0.5788 0.8052 0.031 Uiso 1 1 calc R . .
C30 C 1.3028(6) 0.6810(5) 0.8017(3) 0.0182(14) Uani 1 1 d U . .
H30 H 1.3705 0.7532 0.7924 0.022 Uiso 1 1 calc R . .
C31 C 1.1872(6) 0.6793(5) 0.8084(3) 0.0151(13) Uani 1 1 d U . .
C32 C 0.8700(6) 0.4831(5) 0.8545(3) 0.0158(14) Uani 1 1 d U . .
H32A H 0.9150 0.4764 0.9094 0.019 Uiso 1 1 calc R . .
H32B H 0.8265 0.4019 0.8173 0.019 Uiso 1 1 calc R . .
C33 C 0.7842(6) 0.5987(5) 0.9742(3) 0.0216(15) Uani 1 1 d U . .
H33 H 0.7764 0.5296 1.0041 0.026 Uiso 1 1 calc R . .
C34 C 0.9266(6) 0.7019(5) 1.0058(3) 0.0252(17) Uani 1 1 d U . .
H34A H 0.9365 0.7698 0.9764 0.038 Uiso 1 1 calc R . .
H34B H 0.9890 0.6707 0.9960 0.038 Uiso 1 1 calc R . .
H34C H 0.9453 0.7310 1.0654 0.038 Uiso 1 1 calc R . .
C35 C 0.6836(7) 0.6400(6) 0.9895(4) 0.0386(19) Uani 1 1 d U . .
H35A H 0.7077 0.6775 1.0480 0.058 Uiso 1 1 calc R . .
H35B H 0.5958 0.5692 0.9754 0.058 Uiso 1 1 calc R . .
H35C H 0.6820 0.7002 0.9549 0.058 Uiso 1 1 calc R . .
C36 C 0.5860(6) 0.4087(5) 0.8346(4) 0.0191(15) Uani 1 1 d U . .
H36 H 0.5197 0.4388 0.8413 0.023 Uiso 1 1 calc R . .
C37 C 0.5720(6) 0.3103(5) 0.8878(4) 0.0293(18) Uani 1 1 d U . .
H37A H 0.4803 0.2454 0.8715 0.044 Uiso 1 1 calc R . .
H37B H 0.5948 0.3474 0.9463 0.044 Uiso 1 1 calc R . .
H37C H 0.6319 0.2752 0.8797 0.044 Uiso 1 1 calc R . .
C38 C 0.5548(6) 0.3560(5) 0.7427(3) 0.0262(18) Uani 1 1 d U . .
H38A H 0.6186 0.3260 0.7341 0.039 Uiso 1 1 calc R . .
H38B H 0.5609 0.4202 0.7102 0.039 Uiso 1 1 calc R . .
H38C H 0.4648 0.2881 0.7248 0.039 Uiso 1 1 calc R . .
N1 N 1.0185(5) 0.9033(4) 0.8374(3) 0.0162(11) Uani 1 1 d U . .
N2 N 1.0179(4) 0.7237(4) 0.6476(3) 0.0132(11) Uani 1 1 d U . .
N3 N 0.9625(5) 0.5768(4) 0.8192(3) 0.0125(11) Uani 1 1 d U . .
N4 N 1.1628(5) 0.7878(4) 0.8072(3) 0.0154(11) Uani 1 1 d U . .
P1 P 0.89735(16) 0.97053(13) 0.71810(10) 0.0160(4) Uani 1 1 d U . .
P2 P 0.78496(15) 0.54744(13) 0.56615(9) 0.0144(4) Uani 1 1 d U . .
P3 P 0.75111(16) 0.54268(13) 0.86343(9) 0.0164(4) Uani 1 1 d U . .
Cl02 Cl 0.64479(14) 0.68779(13) 0.71312(9) 0.0222(4) Uani 1 1 d U . .
Th01 Th 0.89880(2) 0.71175(2) 0.749085(14) 0.01178(8) Uani 1 1 d U . .
 
loop_
 _atom_site_aniso_label
 _atom_site_aniso_U_11
 _atom_site_aniso_U_22
 _atom_site_aniso_U_33
 _atom_site_aniso_U_23
 _atom_site_aniso_U_13
 _atom_site_aniso_U_12
C1 0.008(3) 0.016(3) 0.016(3) 0.007(2) 0.006(3) 0.003(2)
C00Y 0.009(3) 0.015(3) 0.015(3) 0.002(2) 0.003(3) 0.006(2)
C2 0.015(4) 0.020(3) 0.022(3) 0.001(3) 0.001(3) 0.010(3)
C3 0.021(4) 0.028(4) 0.014(3) -0.004(3) -0.001(3) 0.005(3)
C4 0.015(4) 0.030(4) 0.012(3) 0.000(3) -0.007(3) 0.006(3)
C5 0.011(4) 0.021(3) 0.017(3) 0.001(3) 0.001(3) 0.005(3)
C6 0.005(3) 0.011(3) 0.015(3) -0.006(2) -0.001(3) -0.003(2)
C7 0.014(4) 0.020(3) 0.031(4) 0.002(3) 0.007(3) 0.010(3)
C8 0.016(4) 0.017(3) 0.030(4) 0.001(3) 0.002(3) 0.009(3)
C9 0.028(4) 0.031(4) 0.042(4) -0.005(3) -0.010(4) 0.021(3)
C10 0.028(4) 0.029(4) 0.033(4) 0.001(3) 0.003(3) 0.026(3)
C11 0.048(6) 0.150(9) 0.073(5) 0.089(6) 0.029(5) 0.027(6)
C12 0.027(4) 0.025(4) 0.084(5) 0.036(4) 0.024(4) 0.017(3)
C13 0.026(4) 0.024(4) 0.071(5) 0.012(4) 0.022(4) 0.010(3)
C14 0.014(3) 0.012(3) 0.018(3) 0.003(2) 0.006(3) 0.005(2)
C15 0.012(3) 0.017(3) 0.016(3) 0.003(2) 0.003(3) 0.010(2)
C16 0.014(4) 0.023(3) 0.023(3) 0.009(3) 0.013(3) 0.011(3)
C17 0.011(4) 0.017(3) 0.029(4) 0.000(3) 0.001(3) 0.003(3)
C18 0.014(4) 0.017(3) 0.020(3) -0.001(3) 0.000(3) 0.009(3)
C19 0.012(3) 0.021(3) 0.017(3) 0.002(3) 0.004(3) 0.011(3)
C20 0.011(3) 0.021(3) 0.014(3) -0.004(3) 0.001(3) 0.005(3)
C21 0.021(4) 0.047(4) 0.012(3) 0.002(3) -0.001(3) 0.019(3)
C22 0.012(4) 0.024(3) 0.021(4) 0.008(3) 0.001(3) 0.009(3)
C23 0.017(4) 0.021(3) 0.021(3) 0.004(3) 0.011(3) 0.009(3)
C24 0.024(4) 0.014(3) 0.040(4) -0.003(3) 0.012(3) 0.009(3)
C25 0.028(4) 0.025(4) 0.027(4) 0.006(3) 0.010(3) 0.019(3)
C26 0.018(3) 0.018(3) 0.010(3) 0.002(3) -0.005(3) 0.009(3)
C27 0.024(4) 0.022(3) 0.014(3) -0.001(3) -0.001(3) 0.014(3)
C28 0.039(4) 0.026(3) 0.015(3) 0.002(3) 0.001(3) 0.027(3)
C29 0.021(4) 0.045(4) 0.019(4) 0.005(3) 0.002(3) 0.024(3)
C30 0.018(4) 0.026(3) 0.010(3) 0.002(3) 0.001(3) 0.011(3)
C31 0.015(3) 0.019(3) 0.014(3) 0.004(2) 0.000(3) 0.012(3)
C32 0.019(3) 0.007(3) 0.014(3) 0.001(2) -0.002(3) 0.002(2)
C33 0.028(4) 0.015(3) 0.017(3) 0.005(2) 0.006(3) 0.005(3)
C34 0.036(4) 0.018(3) 0.016(3) -0.002(3) -0.001(3) 0.011(3)
C35 0.050(5) 0.035(4) 0.036(4) 0.006(3) 0.027(4) 0.018(4)
C36 0.010(3) 0.016(3) 0.033(4) 0.009(3) 0.004(3) 0.007(3)
C37 0.029(4) 0.020(3) 0.030(4) 0.006(3) 0.007(3) 0.003(3)
C38 0.015(4) 0.026(4) 0.027(3) 0.011(3) -0.006(3) 0.004(3)
N1 0.015(3) 0.012(2) 0.020(3) -0.002(2) -0.002(2) 0.009(2)
N2 0.006(3) 0.017(3) 0.012(2) -0.0006(19) -0.001(2) 0.004(2)
N3 0.012(3) 0.012(2) 0.011(2) -0.0001(19) 0.000(2) 0.004(2)
N4 0.013(3) 0.017(3) 0.012(2) 0.001(2) -0.004(2) 0.006(2)
P1 0.0139(10) 0.0146(8) 0.0220(9) 0.0068(7) 0.0052(8) 0.0079(7)
P2 0.0114(9) 0.0166(8) 0.0140(8) 0.0002(6) 0.0013(7) 0.0064(7)
P3 0.0170(10) 0.0134(8) 0.0176(9) 0.0050(7) 0.0048(8) 0.0053(7)
Cl02 0.0120(9) 0.0219(8) 0.0341(10) 0.0109(7) 0.0071(8) 0.0073(7)
Th01 0.01007(14) 0.01163(11) 0.01285(12) 0.00239(8) 0.00172(10) 0.00470(9)
 
_geom_special_details
;
 All esds (except the esd in the dihedral angle between two l.s. planes)
 are estimated using the full covariance matrix.  The cell esds are taken
 into account individually in the estimation of esds in distances, angles
 and torsion angles; correlations between esds in cell parameters are only
 used when they are defined by crystal symmetry.  An approximate (isotropic)
 treatment of cell esds is used for estimating esds involving l.s. planes.
;
 
loop_
 _geom_bond_atom_site_label_1
 _geom_bond_atom_site_label_2
 _geom_bond_distance
 _geom_bond_site_symmetry_2
 _geom_bond_publ_flag
C1 N1 1.380(7) . ?
C1 C2 1.396(8) . ?
C1 C6 1.409(8) . ?
C00Y C18 1.357(7) . ?
C00Y C14 1.416(7) . ?
C00Y N4 1.471(7) . ?
C2 C3 1.388(8) . ?
C2 H2 0.9500 . ?
C3 C4 1.376(9) . ?
C3 H3 0.9500 . ?
C4 C5 1.372(8) . ?
C4 H4 0.9500 . ?
C5 C6 1.381(8) . ?
C5 H5 0.9500 . ?
C6 N4 1.472(7) . ?
C7 N1 1.448(7) . ?
C7 P1 1.847(6) . ?
C7 H7A 0.9900 . ?
C7 H7B 0.9900 . ?
C8 C9 1.528(8) . ?
C8 C10 1.532(8) . ?
C8 P1 1.849(7) . ?
C8 H8 1.0000 . ?
C9 H9A 0.9800 . ?
C9 H9B 0.9800 . ?
C9 H9C 0.9800 . ?
C10 H10A 0.9800 . ?
C10 H10B 0.9800 . ?
C10 H10C 0.9800 . ?
C11 C12 1.528(10) . ?
C11 H11A 0.9800 . ?
C11 H11B 0.9800 . ?
C11 H11C 0.9800 . ?
C12 C13 1.496(9) . ?
C12 P1 1.853(6) . ?
C12 H12 1.0000 . ?
C13 H13A 0.9800 . ?
C13 H13B 0.9800 . ?
C13 H13C 0.9800 . ?
C14 N2 1.382(6) . ?
C14 C15 1.401(7) . ?
C15 C16 1.394(7) . ?
C15 H15 0.9500 . ?
C16 C17 1.367(7) . ?
C16 H16 0.9500 . ?
C17 C18 1.393(8) . ?
C17 H17 0.9500 . ?
C18 H18 0.9500 . ?
C19 N2 1.447(6) . ?
C19 P2 1.844(5) . ?
C19 H19A 0.9900 . ?
C19 H19B 0.9900 . ?
C20 C22 1.530(8) . ?
C20 C21 1.531(8) . ?
C20 P2 1.838(6) . ?
C20 H20 1.0000 . ?
C21 H21A 0.9800 . ?
C21 H21B 0.9800 . ?
C21 H21C 0.9800 . ?
C22 H22A 0.9800 . ?
C22 H22B 0.9800 . ?
C22 H22C 0.9800 . ?
C23 C24 1.530(7) . ?
C23 C25 1.535(8) . ?
C23 P2 1.849(6) . ?
C23 H23 1.0000 . ?
C24 H24A 0.9800 . ?
C24 H24B 0.9800 . ?
C24 H24C 0.9800 . ?
C25 H25A 0.9800 . ?
C25 H25B 0.9800 . ?
C25 H25C 0.9800 . ?
C26 N3 1.381(8) . ?
C26 C27 1.393(8) . ?
C26 C31 1.416(7) . ?
C27 C28 1.376(9) . ?
C27 H27 0.9500 . ?
C28 C29 1.383(8) . ?
C28 H28 0.9500 . ?
C29 C30 1.398(8) . ?
C29 H29 0.9500 . ?
C30 C31 1.351(8) . ?
C30 H30 0.9500 . ?
C31 N4 1.471(7) . ?
C32 N3 1.461(6) . ?
C32 P3 1.829(6) . ?
C32 H32A 0.9900 . ?
C32 H32B 0.9900 . ?
C33 C35 1.504(9) . ?
C33 C34 1.535(8) . ?
C33 P3 1.830(6) . ?
C33 H33 1.0000 . ?
C34 H34A 0.9800 . ?
C34 H34B 0.9800 . ?
C34 H34C 0.9800 . ?
C35 H35A 0.9800 . ?
C35 H35B 0.9800 . ?
C35 H35C 0.9800 . ?
C36 C37 1.533(7) . ?
C36 C38 1.529(8) . ?
C36 P3 1.845(5) . ?
C36 H36 1.0000 . ?
C37 H37A 0.9800 . ?
C37 H37B 0.9800 . ?
C37 H37C 0.9800 . ?
C38 H38A 0.9800 . ?
C38 H38B 0.9800 . ?
C38 H38C 0.9800 . ?
N1 Th01 2.339(4) . ?
N2 Th01 2.367(5) . ?
N3 Th01 2.381(4) . ?
N4 Th01 2.710(5) . ?
P1 Th01 3.2628(16) . ?
P2 Th01 3.2123(15) . ?
P3 Th01 3.1363(15) . ?
Cl02 Th01 2.7501(16) . ?
 
loop_
 _geom_angle_atom_site_label_1
 _geom_angle_atom_site_label_2
 _geom_angle_atom_site_label_3
 _geom_angle
 _geom_angle_site_symmetry_1
 _geom_angle_site_symmetry_3
 _geom_angle_publ_flag
N1 C1 C2 126.1(6) . . ?
N1 C1 C6 116.7(5) . . ?
C2 C1 C6 117.2(5) . . ?
C18 C00Y C14 121.5(5) . . ?
C18 C00Y N4 122.7(5) . . ?
C14 C00Y N4 115.7(5) . . ?
C3 C2 C1 121.1(6) . . ?
C3 C2 H2 119.4 . . ?
C1 C2 H2 119.4 . . ?
C2 C3 C4 120.2(6) . . ?
C2 C3 H3 119.9 . . ?
C4 C3 H3 119.9 . . ?
C5 C4 C3 119.8(6) . . ?
C5 C4 H4 120.1 . . ?
C3 C4 H4 120.1 . . ?
C4 C5 C6 120.6(6) . . ?
C4 C5 H5 119.7 . . ?
C6 C5 H5 119.7 . . ?
C5 C6 C1 120.8(5) . . ?
C5 C6 N4 122.7(6) . . ?
C1 C6 N4 116.5(5) . . ?
N1 C7 P1 103.6(4) . . ?
N1 C7 H7A 111.0 . . ?
P1 C7 H7A 111.0 . . ?
N1 C7 H7B 111.0 . . ?
P1 C7 H7B 111.0 . . ?
H7A C7 H7B 109.0 . . ?
C9 C8 C10 111.2(5) . . ?
C9 C8 P1 111.8(5) . . ?
C10 C8 P1 114.2(4) . . ?
C9 C8 H8 106.3 . . ?
C10 C8 H8 106.3 . . ?
P1 C8 H8 106.3 . . ?
C8 C9 H9A 109.5 . . ?
C8 C9 H9B 109.5 . . ?
H9A C9 H9B 109.5 . . ?
C8 C9 H9C 109.5 . . ?
H9A C9 H9C 109.5 . . ?
H9B C9 H9C 109.5 . . ?
C8 C10 H10A 109.5 . . ?
C8 C10 H10B 109.5 . . ?
H10A C10 H10B 109.5 . . ?
C8 C10 H10C 109.5 . . ?
H10A C10 H10C 109.5 . . ?
H10B C10 H10C 109.5 . . ?
C12 C11 H11A 109.5 . . ?
C12 C11 H11B 109.5 . . ?
H11A C11 H11B 109.5 . . ?
C12 C11 H11C 109.5 . . ?
H11A C11 H11C 109.5 . . ?
H11B C11 H11C 109.5 . . ?
C13 C12 C11 108.6(7) . . ?
C13 C12 P1 113.8(4) . . ?
C11 C12 P1 108.1(5) . . ?
C13 C12 H12 108.7 . . ?
C11 C12 H12 108.7 . . ?
P1 C12 H12 108.7 . . ?
C12 C13 H13A 109.5 . . ?
C12 C13 H13B 109.5 . . ?
H13A C13 H13B 109.5 . . ?
C12 C13 H13C 109.5 . . ?
H13A C13 H13C 109.5 . . ?
H13B C13 H13C 109.5 . . ?
N2 C14 C15 125.0(5) . . ?
N2 C14 C00Y 117.7(5) . . ?
C15 C14 C00Y 117.2(5) . . ?
C16 C15 C14 120.3(5) . . ?
C16 C15 H15 119.8 . . ?
C14 C15 H15 119.8 . . ?
C17 C16 C15 120.9(5) . . ?
C17 C16 H16 119.5 . . ?
C15 C16 H16 119.5 . . ?
C16 C17 C18 119.5(5) . . ?
C16 C17 H17 120.3 . . ?
C18 C17 H17 120.3 . . ?
C00Y C18 C17 120.4(5) . . ?
C00Y C18 H18 119.8 . . ?
C17 C18 H18 119.8 . . ?
N2 C19 P2 105.0(4) . . ?
N2 C19 H19A 110.8 . . ?
P2 C19 H19A 110.8 . . ?
N2 C19 H19B 110.8 . . ?
P2 C19 H19B 110.8 . . ?
H19A C19 H19B 108.8 . . ?
C22 C20 C21 112.1(5) . . ?
C22 C20 P2 109.3(4) . . ?
C21 C20 P2 114.7(4) . . ?
C22 C20 H20 106.8 . . ?
C21 C20 H20 106.8 . . ?
P2 C20 H20 106.8 . . ?
C20 C21 H21A 109.5 . . ?
C20 C21 H21B 109.5 . . ?
H21A C21 H21B 109.5 . . ?
C20 C21 H21C 109.5 . . ?
H21A C21 H21C 109.5 . . ?
H21B C21 H21C 109.5 . . ?
C20 C22 H22A 109.5 . . ?
C20 C22 H22B 109.5 . . ?
H22A C22 H22B 109.5 . . ?
C20 C22 H22C 109.5 . . ?
H22A C22 H22C 109.5 . . ?
H22B C22 H22C 109.5 . . ?
C24 C23 C25 110.8(5) . . ?
C24 C23 P2 110.6(4) . . ?
C25 C23 P2 109.4(4) . . ?
C24 C23 H23 108.7 . . ?
C25 C23 H23 108.7 . . ?
P2 C23 H23 108.7 . . ?
C23 C24 H24A 109.5 . . ?
C23 C24 H24B 109.5 . . ?
H24A C24 H24B 109.5 . . ?
C23 C24 H24C 109.5 . . ?
H24A C24 H24C 109.5 . . ?
H24B C24 H24C 109.5 . . ?
C23 C25 H25A 109.5 . . ?
C23 C25 H25B 109.5 . . ?
H25A C25 H25B 109.5 . . ?
C23 C25 H25C 109.5 . . ?
H25A C25 H25C 109.5 . . ?
H25B C25 H25C 109.5 . . ?
N3 C26 C27 125.4(5) . . ?
N3 C26 C31 118.6(5) . . ?
C27 C26 C31 116.0(6) . . ?
C28 C27 C26 121.8(6) . . ?
C28 C27 H27 119.1 . . ?
C26 C27 H27 119.1 . . ?
C27 C28 C29 120.9(6) . . ?
C27 C28 H28 119.5 . . ?
C29 C28 H28 119.5 . . ?
C28 C29 C30 118.3(6) . . ?
C28 C29 H29 120.9 . . ?
C30 C29 H29 120.9 . . ?
C31 C30 C29 120.6(6) . . ?
C31 C30 H30 119.7 . . ?
C29 C30 H30 119.7 . . ?
C30 C31 C26 122.4(6) . . ?
C30 C31 N4 123.0(5) . . ?
C26 C31 N4 114.6(6) . . ?
N3 C32 P3 101.8(4) . . ?
N3 C32 H32A 111.4 . . ?
P3 C32 H32A 111.4 . . ?
N3 C32 H32B 111.4 . . ?
P3 C32 H32B 111.4 . . ?
H32A C32 H32B 109.3 . . ?
C35 C33 C34 112.1(5) . . ?
C35 C33 P3 110.3(4) . . ?
C34 C33 P3 109.2(4) . . ?
C35 C33 H33 108.4 . . ?
C34 C33 H33 108.4 . . ?
P3 C33 H33 108.4 . . ?
C33 C34 H34A 109.5 . . ?
C33 C34 H34B 109.5 . . ?
H34A C34 H34B 109.5 . . ?
C33 C34 H34C 109.5 . . ?
H34A C34 H34C 109.5 . . ?
H34B C34 H34C 109.5 . . ?
C33 C35 H35A 109.5 . . ?
C33 C35 H35B 109.5 . . ?
H35A C35 H35B 109.5 . . ?
C33 C35 H35C 109.5 . . ?
H35A C35 H35C 109.5 . . ?
H35B C35 H35C 109.5 . . ?
C37 C36 C38 111.5(5) . . ?
C37 C36 P3 114.3(4) . . ?
C38 C36 P3 107.8(4) . . ?
C37 C36 H36 107.6 . . ?
C38 C36 H36 107.6 . . ?
P3 C36 H36 107.6 . . ?
C36 C37 H37A 109.5 . . ?
C36 C37 H37B 109.5 . . ?
H37A C37 H37B 109.5 . . ?
C36 C37 H37C 109.5 . . ?
H37A C37 H37C 109.5 . . ?
H37B C37 H37C 109.5 . . ?
C36 C38 H38A 109.5 . . ?
C36 C38 H38B 109.5 . . ?
H38A C38 H38B 109.5 . . ?
C36 C38 H38C 109.5 . . ?
H38A C38 H38C 109.5 . . ?
H38B C38 H38C 109.5 . . ?
C1 N1 C7 120.1(5) . . ?
C1 N1 Th01 121.6(4) . . ?
C7 N1 Th01 117.8(3) . . ?
C14 N2 C19 117.5(5) . . ?
C14 N2 Th01 119.0(4) . . ?
C19 N2 Th01 120.6(3) . . ?
C26 N3 C32 117.3(5) . . ?
C26 N3 Th01 121.4(3) . . ?
C32 N3 Th01 120.8(4) . . ?
C31 N4 C6 113.7(4) . . ?
C31 N4 C00Y 111.1(5) . . ?
C6 N4 C00Y 112.9(4) . . ?
C31 N4 Th01 108.7(3) . . ?
C6 N4 Th01 105.4(4) . . ?
C00Y N4 Th01 104.3(3) . . ?
C7 P1 C8 103.2(3) . . ?
C7 P1 C12 104.2(3) . . ?
C8 P1 C12 104.7(3) . . ?
C7 P1 Th01 73.94(18) . . ?
C8 P1 Th01 125.44(19) . . ?
C12 P1 Th01 129.2(2) . . ?
C20 P2 C19 102.7(3) . . ?
C20 P2 C23 105.1(3) . . ?
C19 P2 C23 103.1(3) . . ?
C20 P2 Th01 129.9(2) . . ?
C19 P2 Th01 77.65(18) . . ?
C23 P2 Th01 123.78(19) . . ?
C33 P3 C32 105.8(3) . . ?
C33 P3 C36 105.6(3) . . ?
C32 P3 C36 106.3(3) . . ?
C33 P3 Th01 121.68(18) . . ?
C32 P3 Th01 80.85(17) . . ?
C36 P3 Th01 128.44(19) . . ?
N1 Th01 N2 104.20(16) . . ?
N1 Th01 N3 105.20(15) . . ?
N2 Th01 N3 96.49(16) . . ?
N1 Th01 N4 63.95(16) . . ?
N2 Th01 N4 64.03(15) . . ?
N3 Th01 N4 63.55(14) . . ?
N1 Th01 Cl02 102.13(13) . . ?
N2 Th01 Cl02 123.00(11) . . ?
N3 Th01 Cl02 123.55(12) . . ?
N4 Th01 Cl02 166.08(11) . . ?
N1 Th01 P3 102.69(12) . . ?
N2 Th01 P3 144.04(11) . . ?
N3 Th01 P3 53.27(12) . . ?
N4 Th01 P3 108.57(10) . . ?
Cl02 Th01 P3 73.09(4) . . ?
N1 Th01 P2 150.22(11) . . ?
N2 Th01 P2 53.48(11) . . ?
N3 Th01 P2 97.51(11) . . ?
N4 Th01 P2 111.76(11) . . ?
Cl02 Th01 P2 80.24(5) . . ?
P3 Th01 P2 106.31(4) . . ?
N1 Th01 P1 52.22(11) . . ?
N2 Th01 P1 89.48(11) . . ?
N3 Th01 P1 157.40(10) . . ?
N4 Th01 P1 100.36(10) . . ?
Cl02 Th01 P1 69.04(4) . . ?
P3 Th01 P1 126.09(4) . . ?
P2 Th01 P1 103.50(4) . . ?
 
_diffrn_measured_fraction_theta_max    0.979
_diffrn_reflns_theta_full              25.00
_diffrn_measured_fraction_theta_full   0.986
_refine_diff_density_max    0.985
_refine_diff_density_min   -0.922
_refine_diff_density_rms    0.205

# ------ Material relevant to the Complex 3 ------
 
data_shelxl
 
_audit_creation_method            SHELXL-97
_chemical_name_systematic
;
 ?
;
_chemical_name_common             ‘Complex 3’
_chemical_melting_point           ?
_chemical_formula_moiety          'C39 H60 Cl N4 P3 U'
_chemical_formula_sum
 'C39 H60 Cl N4 P3 U'
_chemical_formula_weight          951.32
 
loop_
 _atom_type_symbol
 _atom_type_description
 _atom_type_scat_dispersion_real
 _atom_type_scat_dispersion_imag
 _atom_type_scat_source
 'C'  'C'   0.0033   0.0016
 'International Tables Vol C Tables 4.2.6.8 and 6.1.1.4'
 'H'  'H'   0.0000   0.0000
 'International Tables Vol C Tables 4.2.6.8 and 6.1.1.4'
 'N'  'N'   0.0061   0.0033
 'International Tables Vol C Tables 4.2.6.8 and 6.1.1.4'
 'P'  'P'   0.1023   0.0942
 'International Tables Vol C Tables 4.2.6.8 and 6.1.1.4'
 'Cl'  'Cl'   0.1484   0.1585
 'International Tables Vol C Tables 4.2.6.8 and 6.1.1.4'
 'U'  'U'  -9.6767   9.6646
 'International Tables Vol C Tables 4.2.6.8 and 6.1.1.4'
 
_symmetry_cell_setting            Triclinic
_symmetry_space_group_name_H-M    P-1
 
loop_
 _symmetry_equiv_pos_as_xyz
 'x, y, z'
 '-x, -y, -z'
 
_cell_length_a                    13.5354(4)
_cell_length_b                    16.0795(3)
_cell_length_c                    33.6127(8)
_cell_angle_alpha                 95.0190(10)
_cell_angle_beta                  97.5550(10)
_cell_angle_gamma                 106.0330(10)
_cell_volume                      6910.9(3)
_cell_formula_units_Z             8
_cell_measurement_temperature     100(2)
_cell_measurement_reflns_used     9836
_cell_measurement_theta_min       2.41
_cell_measurement_theta_max       25.24
 
_exptl_crystal_description        needle
_exptl_crystal_colour             orange
_exptl_crystal_size_max           0.09
_exptl_crystal_size_mid           0.03
_exptl_crystal_size_min           0.02
_exptl_crystal_density_meas       a
_exptl_crystal_density_diffrn     1.371
_exptl_crystal_density_method     'not measured'
_exptl_crystal_F_000              2856
_exptl_absorpt_coefficient_mu     3.713
_exptl_absorpt_correction_type    multi-scan
_exptl_absorpt_correction_T_min   0.7310
_exptl_absorpt_correction_T_max   0.9294
_exptl_absorpt_process_details    SADABS
 
_exptl_special_details
;
 ?
;
 
_diffrn_ambient_temperature       100(2)
_diffrn_radiation_wavelength      0.71073
_diffrn_radiation_type            MoK\a
_diffrn_radiation_source          'microfocus sealed tube'
_diffrn_radiation_monochromator   'QUAZAR multilayer mirrors'
_diffrn_measurement_device_type   'Bruker APEX-II CCD'
_diffrn_measurement_method        '\f and \w scans'
_diffrn_detector_area_resol_mean  8.366
_diffrn_reflns_number             91757
_diffrn_reflns_av_R_equivalents   0.1087
_diffrn_reflns_av_sigmaI/netI     0.1454
_diffrn_reflns_limit_h_min        -16
_diffrn_reflns_limit_h_max        16
_diffrn_reflns_limit_k_min        -19
_diffrn_reflns_limit_k_max        19
_diffrn_reflns_limit_l_min        -40
_diffrn_reflns_limit_l_max        40
_diffrn_reflns_theta_min          1.54
_diffrn_reflns_theta_max          25.38
_reflns_number_total              24987
_reflns_number_gt                 15281
_reflns_threshold_expression      >2sigma(I)
 
_computing_data_collection        'Bruker APEX2'
_computing_cell_refinement        'Bruker SAINT'
_computing_data_reduction         'Bruker SAINT'
_computing_structure_solution     'SHELXS-97 (Sheldrick, 2008)'
_computing_structure_refinement   'SHELXL-97 (Sheldrick, 2008)'
_computing_molecular_graphics     'ORTEP-32'
_computing_publication_material   'WinGX'
 
_refine_special_details
;
 Refinement of F^2^ against ALL reflections.  The weighted R-factor wR and
 goodness of fit S are based on F^2^, conventional R-factors R are based
 on F, with F set to zero for negative F^2^. The threshold expression of
 F^2^ > 2sigma(F^2^) is used only for calculating R-factors(gt) etc. and is
 not relevant to the choice of reflections for refinement.  R-factors based
 on F^2^ are statistically about twice as large as those based on F, and R-
 factors based on ALL data will be even larger.
;
 
_refine_ls_structure_factor_coef  Fsqd
_refine_ls_matrix_type            full
_refine_ls_weighting_scheme       calc
_refine_ls_weighting_details
 'calc w=1/[\s^2^(Fo^2^)+(0.0398P)^2^+0.0000P] where P=(Fo^2^+2Fc^2^)/3'
_atom_sites_solution_primary      direct
_atom_sites_solution_secondary    difmap
_atom_sites_solution_hydrogens    geom
_refine_ls_hydrogen_treatment     constr
_refine_ls_extinction_method      none
_refine_ls_extinction_coef        ?
_refine_ls_number_reflns          24987
_refine_ls_number_parameters      1333
_refine_ls_number_restraints      18
_refine_ls_R_factor_all           0.1070
_refine_ls_R_factor_gt            0.0547
_refine_ls_wR_factor_ref          0.1109
_refine_ls_wR_factor_gt           0.0984
_refine_ls_goodness_of_fit_ref    0.927
_refine_ls_restrained_S_all       0.927
_refine_ls_shift/su_max           0.001
_refine_ls_shift/su_mean          0.000
 
loop_
 _atom_site_label
 _atom_site_type_symbol
 _atom_site_fract_x
 _atom_site_fract_y
 _atom_site_fract_z
 _atom_site_U_iso_or_equiv
 _atom_site_adp_type
 _atom_site_occupancy
 _atom_site_symmetry_multiplicity
 _atom_site_calc_flag
 _atom_site_refinement_flags
 _atom_site_disorder_assembly
 _atom_site_disorder_group
C1 C 0.3852(8) 0.8330(6) 0.0116(3) 0.037(3) Uani 1 1 d . . .
H1 H 0.4387 0.8353 -0.0064 0.044 Uiso 1 1 calc R . .
C2 C 0.2959(8) 0.7500(6) -0.0049(3) 0.054(4) Uani 1 1 d . . .
H2A H 0.2391 0.7460 0.0108 0.081 Uiso 1 1 calc R . .
H2B H 0.3212 0.6987 -0.0028 0.081 Uiso 1 1 calc R . .
H2C H 0.2703 0.7521 -0.0334 0.081 Uiso 1 1 calc R . .
C3 C 0.3505(7) 0.9154(6) 0.0074(3) 0.035(3) Uani 1 1 d . . .
H3A H 0.3355 0.9216 -0.0214 0.053 Uiso 1 1 calc R . .
H3B H 0.4062 0.9667 0.0212 0.053 Uiso 1 1 calc R . .
H3C H 0.2877 0.9107 0.0196 0.053 Uiso 1 1 calc R . .
C4 C 0.3730(8) 0.8657(7) 0.0984(3) 0.046(3) Uani 1 1 d . . .
H4 H 0.3524 0.9162 0.0882 0.055 Uiso 1 1 calc R . .
C5 C 0.4380(8) 0.8967(7) 0.1405(3) 0.051(3) Uani 1 1 d . . .
H5A H 0.3952 0.9146 0.1590 0.076 Uiso 1 1 calc R . .
H5B H 0.4982 0.9463 0.1392 0.076 Uiso 1 1 calc R . .
H5C H 0.4621 0.8489 0.1504 0.076 Uiso 1 1 calc R . .
C6 C 0.5714(7) 0.9224(5) 0.0698(3) 0.029(2) Uani 1 1 d . . .
H6A H 0.5943 0.9341 0.0435 0.035 Uiso 1 1 calc R . .
H6B H 0.5609 0.9760 0.0832 0.035 Uiso 1 1 calc R . .
C7 C 0.7344(6) 0.9518(5) 0.1177(2) 0.017(2) Uani 1 1 d . . .
C8 C 0.7918(6) 0.9202(5) 0.1487(2) 0.0143(19) Uani 1 1 d . . .
C9 C 0.8836(6) 0.9721(5) 0.1707(2) 0.018(2) Uani 1 1 d . . .
H9 H 0.9211 0.9491 0.1906 0.021 Uiso 1 1 calc R . .
C10 C 0.9224(7) 1.0584(5) 0.1641(3) 0.020(2) Uani 1 1 d . . .
H10 H 0.9863 1.0943 0.1795 0.024 Uiso 1 1 calc R . .
C11 C 0.7766(8) 1.0405(5) 0.1126(3) 0.029(2) Uani 1 1 d . . .
H11 H 0.7404 1.0656 0.0931 0.035 Uiso 1 1 calc R . .
C12 C 0.8690(7) 1.0911(6) 0.1356(3) 0.028(2) Uani 1 1 d . . .
H12 H 0.8958 1.1502 0.1313 0.034 Uiso 1 1 calc R . .
C13 C 0.6649(7) 0.8181(5) 0.1820(3) 0.019(2) Uani 1 1 d . . .
C14 C 0.6770(7) 0.8791(5) 0.2151(3) 0.022(2) Uani 1 1 d . . .
H14 H 0.7342 0.9307 0.2199 0.026 Uiso 1 1 calc R . .
C15 C 0.6040(7) 0.8641(5) 0.2413(3) 0.021(2) Uani 1 1 d . . .
H15 H 0.6119 0.9054 0.2644 0.025 Uiso 1 1 calc R . .
C16 C 0.5210(7) 0.7898(5) 0.2340(3) 0.024(2) Uani 1 1 d . . .
H16 H 0.4715 0.7803 0.2519 0.029 Uiso 1 1 calc R . .
C17 C 0.5082(7) 0.7277(5) 0.2002(2) 0.023(2) Uani 1 1 d . . .
H17 H 0.4514 0.6758 0.1958 0.028 Uiso 1 1 calc R . .
C18 C 0.5789(7) 0.7421(5) 0.1733(3) 0.018(2) Uani 1 1 d . . .
C19 C 0.4906(6) 0.6057(5) 0.1290(2) 0.020(2) Uani 1 1 d . . .
H19A H 0.4192 0.6114 0.1242 0.024 Uiso 1 1 calc R . .
H19B H 0.4970 0.5715 0.1518 0.024 Uiso 1 1 calc R . .
C20 C 0.3287(7) 0.5363(6) 0.0405(3) 0.041(3) Uani 1 1 d . . .
H20A H 0.2628 0.4977 0.0254 0.061 Uiso 1 1 calc R . .
H20B H 0.3640 0.5758 0.0228 0.061 Uiso 1 1 calc R . .
H20C H 0.3148 0.5704 0.0636 0.061 Uiso 1 1 calc R . .
C21 C 0.3975(7) 0.4821(5) 0.0557(2) 0.025(2) Uani 1 1 d . . .
H21 H 0.4134 0.4510 0.0313 0.030 Uiso 1 1 calc R . .
C22 C 0.3402(8) 0.4119(6) 0.0796(3) 0.041(3) Uani 1 1 d . . .
H22A H 0.3255 0.4400 0.1043 0.061 Uiso 1 1 calc R . .
H22B H 0.3841 0.3744 0.0869 0.061 Uiso 1 1 calc R . .
H22C H 0.2747 0.3765 0.0630 0.061 Uiso 1 1 calc R . .
C23 C 0.5968(7) 0.4831(5) 0.1025(3) 0.026(2) Uani 1 1 d . . .
H23 H 0.5499 0.4385 0.1158 0.032 Uiso 1 1 calc R . .
C24 C 0.6927(7) 0.5327(5) 0.1345(3) 0.029(2) Uani 1 1 d . . .
H24A H 0.7261 0.4910 0.1456 0.043 Uiso 1 1 calc R . .
H24B H 0.6704 0.5640 0.1564 0.043 Uiso 1 1 calc R . .
H24C H 0.7424 0.5745 0.1219 0.043 Uiso 1 1 calc R . .
C25 C 0.6274(7) 0.4357(6) 0.0680(3) 0.038(3) Uani 1 1 d . . .
H25A H 0.6642 0.4779 0.0517 0.057 Uiso 1 1 calc R . .
H25B H 0.5648 0.3958 0.0511 0.057 Uiso 1 1 calc R . .
H25C H 0.6733 0.4023 0.0786 0.057 Uiso 1 1 calc R . .
C26 C 0.9396(7) 0.7402(5) 0.2126(3) 0.025(2) Uani 1 1 d . . .
H26 H 0.9674 0.7376 0.2398 0.031 Uiso 1 1 calc R . .
C27 C 0.8618(7) 0.7795(5) 0.2042(2) 0.020(2) Uani 1 1 d . . .
H27 H 0.8357 0.8045 0.2257 0.024 Uiso 1 1 calc R . .
C28 C 0.8224(7) 0.7824(5) 0.1651(3) 0.020(2) Uani 1 1 d . . .
C29 C 0.8563(6) 0.7440(5) 0.1324(2) 0.016(2) Uani 1 1 d U . .
C30 C 0.9377(7) 0.7072(5) 0.1408(3) 0.024(2) Uani 1 1 d . . .
H30 H 0.9660 0.6843 0.1194 0.028 Uiso 1 1 calc R . .
C31 C 0.9764(7) 0.7046(5) 0.1807(3) 0.024(2) Uani 1 1 d . . .
H31 H 1.0299 0.6775 0.1864 0.029 Uiso 1 1 calc R . .
C32 C 0.8439(7) 0.7110(5) 0.0588(3) 0.027(2) Uani 1 1 d . . .
H32A H 0.7920 0.7037 0.0341 0.032 Uiso 1 1 calc R . .
H32B H 0.8526 0.6529 0.0625 0.032 Uiso 1 1 calc R . .
C33 C 0.9499(7) 0.6705(6) -0.0181(3) 0.045(3) Uani 1 1 d . . .
H33A H 0.9311 0.6563 -0.0476 0.067 Uiso 1 1 calc R . .
H33B H 0.8990 0.6306 -0.0052 0.067 Uiso 1 1 calc R . .
H33C H 1.0193 0.6646 -0.0095 0.067 Uiso 1 1 calc R . .
C34 C 0.9502(7) 0.7647(6) -0.0057(3) 0.034(3) Uani 1 1 d . . .
H34 H 0.8805 0.7713 -0.0163 0.041 Uiso 1 1 calc R . .
C35 C 1.0323(8) 0.8266(6) -0.0239(3) 0.042(3) Uani 1 1 d . . .
H35A H 1.1012 0.8223 -0.0129 0.063 Uiso 1 1 calc R . .
H35B H 1.0298 0.8864 -0.0173 0.063 Uiso 1 1 calc R . .
H35C H 1.0194 0.8112 -0.0534 0.063 Uiso 1 1 calc R . .
C36 C 1.0543(8) 0.9667(6) 0.0692(3) 0.044(3) Uani 1 1 d . . .
H36A H 1.0791 0.9748 0.0433 0.066 Uiso 1 1 calc R . .
H36B H 1.1063 0.9514 0.0880 0.066 Uiso 1 1 calc R . .
H36C H 1.0432 1.0209 0.0807 0.066 Uiso 1 1 calc R . .
C37 C 0.9526(7) 0.8939(5) 0.0625(3) 0.029(2) Uani 1 1 d . . .
H37 H 0.9280 0.8929 0.0893 0.035 Uiso 1 1 calc R . .
C38 C 0.8693(7) 0.9157(6) 0.0339(3) 0.035(3) Uani 1 1 d . . .
H38A H 0.8562 0.9687 0.0457 0.053 Uiso 1 1 calc R . .
H38B H 0.8049 0.8672 0.0296 0.053 Uiso 1 1 calc R . .
H38C H 0.8932 0.9251 0.0079 0.053 Uiso 1 1 calc R . .
C39 C 0.7491(7) 0.0709(5) 0.3227(3) 0.037(3) Uani 1 1 d . . .
H39A H 0.8029 0.0748 0.3055 0.055 Uiso 1 1 calc R . .
H39B H 0.6902 0.0190 0.3125 0.055 Uiso 1 1 calc R . .
H39C H 0.7781 0.0668 0.3505 0.055 Uiso 1 1 calc R . .
C40 C 0.7115(7) 0.1532(5) 0.3221(3) 0.026(2) Uani 1 1 d . . .
H40 H 0.6618 0.1478 0.3419 0.031 Uiso 1 1 calc R . .
C41 C 0.8014(9) 0.2352(6) 0.3389(3) 0.057(4) Uani 1 1 d . . .
H41A H 0.8314 0.2297 0.3663 0.085 Uiso 1 1 calc R . .
H41B H 0.7753 0.2863 0.3396 0.085 Uiso 1 1 calc R . .
H41C H 0.8550 0.2422 0.3215 0.085 Uiso 1 1 calc R . .
C42 C 0.7077(7) 0.1353(6) 0.2337(3) 0.027(2) Uani 1 1 d . . .
H42 H 0.7253 0.0805 0.2391 0.032 Uiso 1 1 calc R . .
C43 C 0.6399(8) 0.1179(8) 0.1925(3) 0.067(4) Uani 1 1 d . . .
H43A H 0.6167 0.1692 0.1874 0.100 Uiso 1 1 calc R . .
H43B H 0.5790 0.0674 0.1918 0.100 Uiso 1 1 calc R . .
H43C H 0.6799 0.1059 0.1716 0.100 Uiso 1 1 calc R . .
C44 C 0.5207(6) 0.0672(5) 0.2673(3) 0.028(2) Uani 1 1 d . . .
H44A H 0.5306 0.0173 0.2505 0.033 Uiso 1 1 calc R . .
H44B H 0.5054 0.0493 0.2938 0.033 Uiso 1 1 calc R . .
C45 C 0.3480(7) 0.0369(5) 0.2257(2) 0.017(2) Uani 1 1 d . . .
C46 C 0.3135(7) -0.0519(5) 0.2305(3) 0.023(2) Uani 1 1 d . . .
H46 H 0.3557 -0.0763 0.2480 0.028 Uiso 1 1 calc R . .
C47 C 0.2183(7) -0.1041(5) 0.2098(2) 0.019(2) Uani 1 1 d . . .
H47 H 0.1975 -0.1644 0.2128 0.022 Uiso 1 1 calc R . .
C48 C 0.1530(7) -0.0716(5) 0.1851(3) 0.020(2) Uani 1 1 d . . .
H48 H 0.0870 -0.1083 0.1719 0.024 Uiso 1 1 calc R . .
C49 C 0.1852(7) 0.0165(5) 0.1797(2) 0.022(2) Uani 1 1 d . . .
H49 H 0.1414 0.0403 0.1627 0.027 Uiso 1 1 calc R . .
C50 C 0.2834(7) 0.0697(5) 0.1999(2) 0.017(2) Uani 1 1 d . . .
C51 C 0.3885(7) 0.1743(5) 0.1622(2) 0.017(2) Uani 1 1 d . . .
C52 C 0.3660(7) 0.1166(5) 0.1265(3) 0.026(2) Uani 1 1 d . . .
H52 H 0.3101 0.0642 0.1230 0.031 Uiso 1 1 calc R . .
C53 C 0.4265(8) 0.1362(6) 0.0958(3) 0.037(3) Uani 1 1 d . . .
H53 H 0.4116 0.0979 0.0712 0.044 Uiso 1 1 calc R . .
C54 C 0.5083(8) 0.2125(6) 0.1021(3) 0.032(3) Uani 1 1 d . . .
H54 H 0.5493 0.2266 0.0814 0.038 Uiso 1 1 calc R . .
C55 C 0.5312(7) 0.2680(5) 0.1375(3) 0.027(2) Uani 1 1 d . . .
H55 H 0.5882 0.3196 0.1410 0.033 Uiso 1 1 calc R . .
C56 C 0.4727(7) 0.2504(5) 0.1684(3) 0.021(2) Uani 1 1 d . . .
C57 C 0.5654(7) 0.3887(5) 0.2113(2) 0.023(2) Uani 1 1 d . . .
H57A H 0.5471 0.4213 0.1892 0.028 Uiso 1 1 calc R . .
H57B H 0.6385 0.3879 0.2121 0.028 Uiso 1 1 calc R . .
C58 C 0.4769(7) 0.5156(5) 0.2451(3) 0.027(2) Uani 1 1 d . . .
H58 H 0.5146 0.5501 0.2255 0.032 Uiso 1 1 calc R . .
C59 C 0.3678(7) 0.4663(6) 0.2239(3) 0.046(3) Uani 1 1 d . . .
H59A H 0.3267 0.4385 0.2437 0.069 Uiso 1 1 calc R . .
H59B H 0.3712 0.4216 0.2028 0.069 Uiso 1 1 calc R . .
H59C H 0.3348 0.5071 0.2116 0.069 Uiso 1 1 calc R . .
C60 C 0.4737(8) 0.5802(6) 0.2822(3) 0.038(3) Uani 1 1 d . . .
H60A H 0.4286 0.6159 0.2738 0.057 Uiso 1 1 calc R . .
H60B H 0.5442 0.6181 0.2927 0.057 Uiso 1 1 calc R . .
H60C H 0.4462 0.5469 0.3035 0.057 Uiso 1 1 calc R . .
C61 C 0.6770(7) 0.5063(5) 0.2851(3) 0.025(2) Uani 1 1 d . . .
H61 H 0.6683 0.5415 0.3098 0.030 Uiso 1 1 calc R . .
C62 C 0.7428(7) 0.4459(6) 0.2996(3) 0.038(3) Uani 1 1 d . . .
H62A H 0.7499 0.4084 0.2762 0.057 Uiso 1 1 calc R . .
H62B H 0.7079 0.4095 0.3185 0.057 Uiso 1 1 calc R . .
H62C H 0.8119 0.4816 0.3132 0.057 Uiso 1 1 calc R . .
C63 C 0.7347(7) 0.5703(5) 0.2587(3) 0.036(3) Uani 1 1 d . . .
H63A H 0.7996 0.6084 0.2749 0.054 Uiso 1 1 calc R . .
H63B H 0.6907 0.6057 0.2488 0.054 Uiso 1 1 calc R . .
H63C H 0.7508 0.5375 0.2357 0.054 Uiso 1 1 calc R . .
C64 C 0.2441(7) 0.2074(5) 0.1894(3) 0.023(2) Uani 1 1 d . . .
C65 C 0.1991(7) 0.2226(5) 0.1527(3) 0.023(2) Uani 1 1 d . . .
H65 H 0.2210 0.2042 0.1286 0.027 Uiso 1 1 calc R . .
C66 C 0.1222(7) 0.2645(5) 0.1506(3) 0.024(2) Uani 1 1 d . . .
H66 H 0.0924 0.2762 0.1252 0.029 Uiso 1 1 calc R . .
C67 C 0.0891(7) 0.2892(5) 0.1859(3) 0.026(2) Uani 1 1 d . . .
H67 H 0.0337 0.3149 0.1846 0.032 Uiso 1 1 calc R . .
C68 C 0.1365(7) 0.2766(5) 0.2231(3) 0.021(2) Uani 1 1 d . . .
H68 H 0.1132 0.2940 0.2471 0.026 Uiso 1 1 calc R . .
C69 C 0.2174(6) 0.2388(5) 0.2258(3) 0.014(2) Uani 1 1 d . . .
C70 C 0.2383(6) 0.2478(5) 0.2998(2) 0.019(2) Uani 1 1 d . . .
H70A H 0.2240 0.3050 0.3011 0.023 Uiso 1 1 calc R . .
H70B H 0.2938 0.2512 0.3228 0.023 Uiso 1 1 calc R . .
C71 C 0.1574(8) 0.0608(5) 0.2946(3) 0.040(3) Uani 1 1 d . . .
H71 H 0.1837 0.0662 0.2682 0.048 Uiso 1 1 calc R . .
C72 C 0.0623(9) -0.0210(6) 0.2868(3) 0.070(4) Uani 1 1 d . . .
H72A H 0.0782 -0.0679 0.2705 0.105 Uiso 1 1 calc R . .
H72B H 0.0024 -0.0073 0.2722 0.105 Uiso 1 1 calc R . .
H72C H 0.0459 -0.0399 0.3127 0.105 Uiso 1 1 calc R . .
C73 C 0.2452(8) 0.0489(6) 0.3239(3) 0.046(3) Uani 1 1 d . . .
H73A H 0.2197 0.0319 0.3489 0.069 Uiso 1 1 calc R . .
H73B H 0.3016 0.1038 0.3302 0.069 Uiso 1 1 calc R . .
H73C H 0.2714 0.0032 0.3118 0.069 Uiso 1 1 calc R . .
C74 C 0.0595(7) 0.1061(5) 0.3797(3) 0.031(2) Uani 1 1 d . . .
H74A H 0.0680 0.1206 0.4091 0.047 Uiso 1 1 calc R . .
H74B H 0.0759 0.0512 0.3734 0.047 Uiso 1 1 calc R . .
H74C H -0.0127 0.0996 0.3677 0.047 Uiso 1 1 calc R . .
C75 C 0.1318(7) 0.1779(5) 0.3626(2) 0.022(2) Uani 1 1 d . . .
H75 H 0.2046 0.1785 0.3733 0.026 Uiso 1 1 calc R . .
C76 C 0.1202(8) 0.2663(6) 0.3773(3) 0.044(3) Uani 1 1 d . . .
H76A H 0.0494 0.2679 0.3676 0.066 Uiso 1 1 calc R . .
H76B H 0.1705 0.3123 0.3670 0.066 Uiso 1 1 calc R . .
H76C H 0.1334 0.2758 0.4070 0.066 Uiso 1 1 calc R . .
C77 C 0.4496(7) 0.6215(5) 0.4130(2) 0.017(2) Uani 1 1 d . . .
C78 C 0.5409(7) 0.5983(5) 0.4151(2) 0.020(2) Uani 1 1 d . . .
H78 H 0.6039 0.6365 0.4301 0.024 Uiso 1 1 calc R . .
C79 C 0.5397(7) 0.5180(5) 0.3950(3) 0.024(2) Uani 1 1 d . . .
H79 H 0.6024 0.5021 0.3953 0.029 Uiso 1 1 calc R . .
C80 C 0.4472(8) 0.4625(6) 0.3747(3) 0.030(2) Uani 1 1 d . . .
H80 H 0.4467 0.4075 0.3616 0.036 Uiso 1 1 calc R . .
C81 C 0.3544(7) 0.4840(5) 0.3727(2) 0.020(2) Uani 1 1 d . . .
H81 H 0.2919 0.4451 0.3576 0.023 Uiso 1 1 calc R . .
C82 C 0.3536(7) 0.5648(5) 0.3935(2) 0.019(2) Uani 1 1 d . . .
C83 C 0.1700(6) 0.5419(5) 0.3673(2) 0.017(2) Uani 1 1 d U . .
H83A H 0.1104 0.5605 0.3749 0.020 Uiso 1 1 calc R . .
H83B H 0.1560 0.4792 0.3703 0.020 Uiso 1 1 calc R . .
C84 C 0.0354(6) 0.5093(5) 0.2931(2) 0.021(2) Uani 1 1 d . . .
H84 H -0.0043 0.5426 0.3078 0.026 Uiso 1 1 calc R . .
C85 C 0.0007(7) 0.4149(5) 0.3004(3) 0.035(3) Uani 1 1 d . . .
H85A H -0.0697 0.3868 0.2854 0.053 Uiso 1 1 calc R . .
H85B H 0.0003 0.4120 0.3293 0.053 Uiso 1 1 calc R . .
H85C H 0.0488 0.3847 0.2911 0.053 Uiso 1 1 calc R . .
C86 C 0.0147(7) 0.5163(6) 0.2484(3) 0.042(3) Uani 1 1 d . . .
H86A H 0.0578 0.4879 0.2342 0.063 Uiso 1 1 calc R . .
H86B H 0.0320 0.5779 0.2443 0.063 Uiso 1 1 calc R . .
H86C H -0.0590 0.4875 0.2377 0.063 Uiso 1 1 calc R . .
C87 C 0.2045(7) 0.6752(5) 0.3175(3) 0.027(2) Uani 1 1 d . . .
H87 H 0.2665 0.6999 0.3392 0.033 Uiso 1 1 calc R . .
C88 C 0.1200(7) 0.7137(5) 0.3297(3) 0.032(3) Uani 1 1 d . . .
H88A H 0.1483 0.7773 0.3358 0.048 Uiso 1 1 calc R . .
H88B H 0.0963 0.6895 0.3538 0.048 Uiso 1 1 calc R . .
H88C H 0.0611 0.6990 0.3074 0.048 Uiso 1 1 calc R . .
C89 C 0.2376(7) 0.7104(6) 0.2785(3) 0.042(3) Uani 1 1 d . . .
H89A H 0.1773 0.6933 0.2567 0.062 Uiso 1 1 calc R . .
H89B H 0.2920 0.6860 0.2705 0.062 Uiso 1 1 calc R . .
H89C H 0.2646 0.7742 0.2834 0.062 Uiso 1 1 calc R . .
C90 C 0.4517(6) 0.7700(5) 0.4003(2) 0.015(2) Uani 1 1 d . . .
C91 C 0.5139(6) 0.7717(5) 0.3710(2) 0.0141(19) Uani 1 1 d . . .
H91 H 0.5527 0.7310 0.3690 0.017 Uiso 1 1 calc R . .
C92 C 0.5195(7) 0.8334(5) 0.3442(3) 0.025(2) Uani 1 1 d . . .
H92 H 0.5609 0.8344 0.3235 0.030 Uiso 1 1 calc R . .
C93 C 0.4641(7) 0.8933(5) 0.3482(3) 0.026(2) Uani 1 1 d . . .
H93 H 0.4705 0.9371 0.3307 0.031 Uiso 1 1 calc R . .
C94 C 0.3997(6) 0.8909(5) 0.3769(2) 0.020(2) Uani 1 1 d . . .
H94 H 0.3597 0.9310 0.3783 0.024 Uiso 1 1 calc R . .
C95 C 0.3940(6) 0.8286(5) 0.4038(2) 0.0108(18) Uani 1 1 d U . .
C96 C 0.2772(6) 0.8835(5) 0.4437(2) 0.017(2) Uani 1 1 d . . .
H96A H 0.2191 0.8829 0.4223 0.020 Uiso 1 1 calc R . .
H96B H 0.3287 0.9421 0.4483 0.020 Uiso 1 1 calc R . .
C97 C 0.1024(7) 0.8778(6) 0.4840(3) 0.029(2) Uani 1 1 d . . .
H97 H 0.0640 0.8435 0.4576 0.035 Uiso 1 1 calc R . .
C98 C 0.0343(7) 0.8413(5) 0.5154(3) 0.033(3) Uani 1 1 d . . .
H98A H 0.0664 0.8731 0.5423 0.049 Uiso 1 1 calc R . .
H98B H 0.0284 0.7792 0.5155 0.049 Uiso 1 1 calc R . .
H98C H -0.0352 0.8484 0.5082 0.049 Uiso 1 1 calc R . .
C99 C 0.1089(7) 0.9699(5) 0.4789(3) 0.043(3) Uani 1 1 d . . .
H99A H 0.0389 0.9746 0.4702 0.064 Uiso 1 1 calc R . .
H99B H 0.1526 0.9887 0.4584 0.064 Uiso 1 1 calc R . .
H99C H 0.1396 1.0071 0.5047 0.064 Uiso 1 1 calc R . .
C100 C 0.3223(7) 0.9388(5) 0.5280(3) 0.028(2) Uani 1 1 d . . .
H100 H 0.3295 0.9966 0.5181 0.034 Uiso 1 1 calc R . .
C101 C 0.4275(7) 0.9202(6) 0.5321(3) 0.037(3) Uani 1 1 d . . .
H10A H 0.4794 0.9673 0.5505 0.056 Uiso 1 1 calc R . .
H10B H 0.4491 0.9167 0.5055 0.056 Uiso 1 1 calc R . .
H10C H 0.4215 0.8647 0.5430 0.056 Uiso 1 1 calc R . .
C102 C 0.2882(9) 0.9418(7) 0.5700(3) 0.056(3) Uani 1 1 d . . .
H10D H 0.2738 0.8836 0.5786 0.083 Uiso 1 1 calc R . .
H10E H 0.2250 0.9608 0.5684 0.083 Uiso 1 1 calc R . .
H10F H 0.3439 0.9830 0.5896 0.083 Uiso 1 1 calc R . .
C103 C 0.5231(6) 0.7440(5) 0.4681(2) 0.015(2) Uani 1 1 d . . .
C104 C 0.6234(6) 0.7942(5) 0.4675(3) 0.020(2) Uani 1 1 d . . .
H104 H 0.6436 0.8105 0.4426 0.024 Uiso 1 1 calc R . .
C105 C 0.6948(7) 0.8210(5) 0.5026(3) 0.027(2) Uani 1 1 d . . .
H105 H 0.7644 0.8545 0.5022 0.033 Uiso 1 1 calc R . .
C106 C 0.6622(7) 0.7977(6) 0.5391(3) 0.030(2) Uani 1 1 d . . .
H106 H 0.7110 0.8151 0.5635 0.035 Uiso 1 1 calc R . .
C107 C 0.5611(7) 0.7500(5) 0.5404(3) 0.020(2) Uani 1 1 d . . .
H107 H 0.5403 0.7363 0.5656 0.024 Uiso 1 1 calc R . .
C108 C 0.4896(7) 0.7219(5) 0.5045(2) 0.018(2) Uani 1 1 d . . .
C109 C 0.3518(6) 0.6361(5) 0.5376(2) 0.020(2) Uani 1 1 d . . .
H10G H 0.3421 0.6793 0.5585 0.024 Uiso 1 1 calc R . .
H10H H 0.4019 0.6071 0.5498 0.024 Uiso 1 1 calc R . .
C110 C 0.1092(7) 0.6354(6) 0.5553(3) 0.035(3) Uani 1 1 d . . .
H11G H 0.0557 0.6313 0.5727 0.052 Uiso 1 1 calc R . .
H11H H 0.0824 0.6466 0.5284 0.052 Uiso 1 1 calc R . .
H11I H 0.1713 0.6833 0.5672 0.052 Uiso 1 1 calc R . .
C111 C 0.1374(6) 0.5503(5) 0.5516(2) 0.020(2) Uani 1 1 d . . .
H111 H 0.0718 0.5029 0.5403 0.024 Uiso 1 1 calc R . .
C112 C 0.1785(7) 0.5280(6) 0.5930(2) 0.028(2) Uani 1 1 d . . .
H11A H 0.2461 0.5703 0.6040 0.043 Uiso 1 1 calc R . .
H11B H 0.1866 0.4692 0.5897 0.043 Uiso 1 1 calc R . .
H11C H 0.1290 0.5303 0.6116 0.043 Uiso 1 1 calc R . .
C113 C 0.2563(7) 0.4501(5) 0.5103(3) 0.023(2) Uani 1 1 d . . .
H113 H 0.2820 0.4404 0.5383 0.027 Uiso 1 1 calc R . .
C114 C 0.1583(7) 0.3755(5) 0.4935(3) 0.031(2) Uani 1 1 d . . .
H11J H 0.1296 0.3849 0.4665 0.046 Uiso 1 1 calc R . .
H11K H 0.1066 0.3735 0.5116 0.046 Uiso 1 1 calc R . .
H11L H 0.1757 0.3202 0.4917 0.046 Uiso 1 1 calc R . .
C115 C 0.3458(7) 0.4549(6) 0.4849(3) 0.031(2) Uani 1 1 d . . .
H11D H 0.3653 0.4006 0.4847 0.047 Uiso 1 1 calc R . .
H11E H 0.4064 0.5041 0.4969 0.047 Uiso 1 1 calc R . .
H11F H 0.3220 0.4631 0.4571 0.047 Uiso 1 1 calc R . .
C116 C 0.8079(9) 0.2049(7) 0.2331(3) 0.072(4) Uani 1 1 d . . .
H11M H 0.8302 0.1978 0.2068 0.107 Uiso 1 1 calc R . .
H11N H 0.8617 0.1998 0.2545 0.107 Uiso 1 1 calc R . .
H11O H 0.7970 0.2626 0.2377 0.107 Uiso 1 1 calc R . .
C117 C 0.2763(10) 0.7945(11) 0.0996(4) 0.140(8) Uani 1 1 d . . .
H11P H 0.2939 0.7403 0.1034 0.210 Uiso 1 1 calc R . .
H11Q H 0.2281 0.7861 0.0742 0.210 Uiso 1 1 calc R . .
H11R H 0.2431 0.8103 0.1222 0.210 Uiso 1 1 calc R . .
N1 N 0.5678(5) 0.6903(4) 0.1368(2) 0.0165(16) Uani 1 1 d . . .
N2 N 0.6460(6) 0.8923(4) 0.0955(2) 0.0243(18) Uani 1 1 d . . .
N3 N 0.8022(5) 0.7419(4) 0.0937(2) 0.0185(17) Uani 1 1 d . . .
N4 N 0.7428(5) 0.8283(4) 0.15435(19) 0.0148(16) Uani 1 1 d . . .
N5 N 0.2764(5) 0.2325(4) 0.26236(19) 0.0138(16) Uani 1 1 d . . .
N6 N 0.4948(5) 0.3001(4) 0.2059(2) 0.0199(17) Uani 1 1 d . . .
N7 N 0.4374(5) 0.0970(4) 0.2470(2) 0.0177(17) Uani 1 1 d . . .
N8 N 0.3250(5) 0.1626(4) 0.19400(19) 0.0139(16) Uani 1 1 d . . .
N9 N 0.2638(5) 0.5908(4) 0.39557(18) 0.0134(16) Uani 1 1 d . . .
N10 N 0.3261(5) 0.8152(4) 0.4327(2) 0.0205(17) Uani 1 1 d . . .
N11 N 0.3851(5) 0.6761(4) 0.50264(18) 0.0152(16) Uani 1 1 d . . .
N12 N 0.4467(5) 0.7085(4) 0.43083(19) 0.0140(16) Uani 1 1 d . . .
P1 P 0.45095(19) 0.82908(15) 0.06305(7) 0.0252(6) Uani 1 1 d . . .
P2 P 0.52211(19) 0.55516(14) 0.08333(7) 0.0211(6) Uani 1 1 d . . .
P3 P 0.97290(19) 0.78589(16) 0.05068(7) 0.0281(6) Uani 1 1 d . . .
P4 P 0.63771(18) 0.16359(14) 0.27385(7) 0.0194(5) Uani 1 1 d . . .
P5 P 0.54629(18) 0.43793(14) 0.26068(7) 0.0200(6) Uani 1 1 d . . .
P6 P 0.11595(19) 0.16130(16) 0.30614(7) 0.0261(6) Uani 1 1 d . . .
P7 P 0.17643(18) 0.55491(15) 0.31358(7) 0.0224(6) Uani 1 1 d . . .
P8 P 0.22584(17) 0.55575(14) 0.51402(7) 0.0175(5) Uani 1 1 d . . .
P9 P 0.22948(18) 0.85288(14) 0.49074(7) 0.0199(6) Uani 1 1 d . . .
Cl1 Cl 0.05602(16) 0.65863(13) 0.43720(7) 0.0236(5) Uani 1 1 d . . .
Cl2 Cl 0.51158(18) 0.25686(14) 0.34218(6) 0.0274(6) Uani 1 1 d . . .
Cl3 Cl 0.59547(18) 0.73231(14) 0.00305(6) 0.0282(6) Uani 1 1 d . . .
U1 U 0.26124(2) 0.68102(2) 0.450589(10) 0.01412(9) Uani 1 1 d . . .
U2 U 0.44589(3) 0.238487(19) 0.262056(10) 0.01574(9) Uani 1 1 d . . .
U3 U 0.63625(3) 0.74998(2) 0.083663(10) 0.01694(9) Uani 1 1 d . . .
 
loop_
 _atom_site_aniso_label
 _atom_site_aniso_U_11
 _atom_site_aniso_U_22
 _atom_site_aniso_U_33
 _atom_site_aniso_U_23
 _atom_site_aniso_U_13
 _atom_site_aniso_U_12
C1 0.040(7) 0.045(6) 0.025(6) -0.007(5) -0.010(5) 0.022(6)
C2 0.072(9) 0.032(6) 0.044(7) -0.021(5) -0.043(6) 0.026(6)
C3 0.025(6) 0.044(6) 0.035(7) 0.013(5) -0.001(5) 0.007(5)
C4 0.052(8) 0.074(8) 0.029(7) -0.002(6) 0.006(6) 0.049(7)
C5 0.063(9) 0.068(8) 0.030(7) 0.003(6) 0.014(6) 0.032(7)
C6 0.047(7) 0.030(6) 0.012(5) 0.008(4) 0.006(5) 0.013(5)
C7 0.012(5) 0.020(5) 0.014(5) -0.008(4) 0.004(4) -0.002(4)
C8 0.023(5) 0.006(4) 0.015(5) 0.002(4) 0.005(4) 0.004(4)
C9 0.022(5) 0.017(5) 0.015(5) 0.001(4) 0.005(4) 0.005(4)
C10 0.023(5) 0.015(5) 0.022(6) 0.002(4) 0.006(4) 0.003(4)
C11 0.051(7) 0.012(5) 0.034(6) 0.015(5) 0.020(5) 0.015(5)
C12 0.033(6) 0.013(5) 0.033(6) 0.001(5) 0.019(5) -0.006(5)
C13 0.027(6) 0.014(5) 0.019(5) 0.004(4) 0.001(4) 0.013(4)
C14 0.033(6) 0.013(5) 0.021(6) -0.003(4) 0.004(5) 0.010(4)
C15 0.031(6) 0.016(5) 0.016(5) 0.004(4) 0.001(4) 0.010(4)
C16 0.026(6) 0.025(5) 0.019(5) 0.001(4) 0.013(4) 0.001(5)
C17 0.049(7) 0.016(5) 0.010(5) 0.006(4) 0.015(5) 0.011(5)
C18 0.029(6) 0.003(4) 0.020(5) 0.006(4) -0.001(4) 0.001(4)
C19 0.017(5) 0.025(5) 0.017(5) 0.002(4) 0.009(4) 0.003(4)
C20 0.032(7) 0.028(6) 0.054(8) -0.002(5) -0.011(5) 0.008(5)
C21 0.042(6) 0.014(5) 0.008(5) -0.007(4) -0.006(4) -0.003(4)
C22 0.043(7) 0.026(6) 0.044(7) -0.002(5) -0.002(6) 0.000(5)
C23 0.031(6) 0.016(5) 0.031(6) 0.000(4) 0.011(5) 0.002(4)
C24 0.034(6) 0.019(5) 0.032(6) -0.001(4) 0.000(5) 0.009(5)
C25 0.030(6) 0.032(6) 0.047(7) -0.001(5) 0.000(5) 0.006(5)
C26 0.024(6) 0.018(5) 0.030(6) 0.004(4) 0.002(5) 0.000(4)
C27 0.031(6) 0.015(5) 0.012(5) 0.002(4) -0.002(4) 0.007(4)
C28 0.034(6) 0.008(4) 0.019(5) 0.006(4) 0.005(4) 0.007(4)
C29 0.021(4) 0.007(3) 0.015(4) 0.004(3) 0.003(3) -0.003(3)
C30 0.027(6) 0.018(5) 0.028(6) -0.003(4) 0.006(5) 0.011(4)
C31 0.019(5) 0.018(5) 0.033(6) 0.014(5) -0.003(5) 0.003(4)
C32 0.034(6) 0.028(5) 0.012(5) 0.001(4) -0.003(4) 0.003(5)
C33 0.031(7) 0.050(7) 0.054(8) -0.011(6) 0.020(6) 0.011(5)
C34 0.021(6) 0.047(7) 0.032(6) 0.000(5) 0.006(5) 0.005(5)
C35 0.039(7) 0.051(7) 0.029(7) -0.006(5) 0.011(5) 0.002(6)
C36 0.069(9) 0.037(6) 0.012(6) 0.004(5) 0.008(5) -0.006(6)
C37 0.036(6) 0.030(6) 0.015(5) -0.006(4) 0.005(5) -0.001(5)
C38 0.042(7) 0.025(6) 0.038(7) 0.003(5) 0.019(5) 0.004(5)
C39 0.039(7) 0.032(6) 0.038(7) 0.002(5) -0.012(5) 0.018(5)
C40 0.022(6) 0.027(5) 0.033(6) 0.010(5) 0.000(5) 0.015(5)
C41 0.070(9) 0.028(6) 0.052(8) 0.005(6) -0.026(7) -0.002(6)
C42 0.031(6) 0.027(5) 0.023(6) 0.000(4) 0.003(5) 0.012(5)
C43 0.043(8) 0.142(12) 0.020(6) -0.027(7) -0.009(6) 0.052(8)
C44 0.017(5) 0.027(5) 0.039(6) 0.011(5) 0.000(5) 0.006(4)
C45 0.024(5) 0.014(5) 0.014(5) 0.002(4) 0.013(4) 0.002(4)
C46 0.027(6) 0.027(5) 0.017(5) 0.000(4) 0.004(4) 0.011(5)
C47 0.023(5) 0.009(4) 0.024(6) 0.001(4) 0.005(4) 0.005(4)
C48 0.017(5) 0.012(5) 0.024(6) -0.002(4) -0.001(4) -0.005(4)
C49 0.027(6) 0.029(5) 0.012(5) 0.001(4) 0.004(4) 0.011(5)
C50 0.030(6) 0.007(4) 0.009(5) 0.002(4) 0.006(4) -0.002(4)
C51 0.030(6) 0.014(5) 0.010(5) 0.000(4) 0.011(4) 0.007(4)
C52 0.038(6) 0.018(5) 0.023(6) -0.001(4) 0.009(5) 0.009(5)
C53 0.068(8) 0.025(6) 0.015(6) -0.003(5) 0.020(6) 0.006(6)
C54 0.055(7) 0.021(5) 0.021(6) 0.001(5) 0.026(5) 0.004(5)
C55 0.033(6) 0.010(5) 0.036(6) 0.007(5) 0.012(5) -0.003(4)
C56 0.029(6) 0.014(5) 0.017(5) -0.001(4) 0.000(4) 0.005(4)
C57 0.030(6) 0.016(5) 0.021(6) 0.007(4) 0.003(4) 0.002(4)
C58 0.036(6) 0.021(5) 0.036(6) 0.017(5) 0.010(5) 0.021(5)
C59 0.037(7) 0.037(6) 0.063(8) 0.018(6) -0.010(6) 0.015(5)
C60 0.060(8) 0.029(6) 0.041(7) 0.017(5) 0.031(6) 0.025(5)
C61 0.027(6) 0.020(5) 0.026(6) 0.002(4) 0.005(5) 0.000(4)
C62 0.022(6) 0.040(6) 0.047(7) 0.005(5) 0.009(5) -0.002(5)
C63 0.029(6) 0.026(6) 0.036(7) -0.007(5) -0.001(5) -0.012(5)
C64 0.028(6) 0.020(5) 0.027(6) 0.012(4) 0.012(5) 0.010(4)
C65 0.036(6) 0.013(5) 0.017(5) 0.005(4) 0.007(5) 0.003(4)
C66 0.031(6) 0.015(5) 0.020(6) 0.006(4) -0.008(5) 0.000(4)
C67 0.024(6) 0.028(5) 0.026(6) 0.006(5) -0.005(5) 0.010(5)
C68 0.032(6) 0.009(5) 0.022(6) -0.004(4) 0.003(5) 0.008(4)
C69 0.009(5) 0.007(4) 0.025(6) 0.005(4) -0.004(4) 0.000(4)
C70 0.018(5) 0.018(5) 0.012(5) -0.005(4) -0.003(4) -0.004(4)
C71 0.062(8) 0.021(5) 0.029(6) -0.010(5) 0.033(6) -0.008(5)
C72 0.090(11) 0.035(7) 0.064(9) -0.021(6) 0.050(8) -0.024(7)
C73 0.067(9) 0.040(7) 0.049(8) 0.013(6) 0.033(7) 0.030(6)
C74 0.038(6) 0.035(6) 0.022(6) 0.010(5) 0.014(5) 0.005(5)
C75 0.018(5) 0.030(5) 0.015(5) -0.004(4) -0.002(4) 0.007(4)
C76 0.061(8) 0.034(6) 0.045(7) 0.008(5) 0.034(6) 0.014(6)
C77 0.022(5) 0.020(5) 0.010(5) 0.002(4) 0.003(4) 0.007(4)
C78 0.020(5) 0.025(5) 0.015(5) 0.006(4) 0.000(4) 0.007(4)
C79 0.022(6) 0.020(5) 0.033(6) 0.000(4) 0.005(5) 0.010(4)
C80 0.045(7) 0.031(6) 0.027(6) 0.009(5) 0.012(5) 0.026(5)
C81 0.030(6) 0.013(5) 0.013(5) -0.005(4) 0.000(4) 0.005(4)
C82 0.028(6) 0.018(5) 0.010(5) 0.007(4) -0.002(4) 0.005(4)
C83 0.016(4) 0.011(3) 0.021(4) 0.004(3) 0.005(3) 0.000(3)
C84 0.025(6) 0.017(5) 0.021(6) -0.004(4) 0.001(4) 0.005(4)
C85 0.022(6) 0.028(6) 0.046(7) -0.009(5) -0.005(5) 0.000(5)
C86 0.033(7) 0.057(7) 0.018(6) -0.002(5) -0.010(5) -0.006(5)
C87 0.020(6) 0.029(5) 0.021(6) 0.004(5) 0.001(4) -0.010(4)
C88 0.056(7) 0.017(5) 0.019(6) 0.005(4) -0.002(5) 0.005(5)
C89 0.033(6) 0.051(7) 0.051(8) 0.025(6) 0.009(5) 0.023(5)
C90 0.020(5) 0.017(5) 0.007(5) 0.003(4) 0.005(4) 0.001(4)
C91 0.015(5) 0.020(5) 0.006(5) 0.002(4) 0.003(4) 0.003(4)
C92 0.028(6) 0.030(5) 0.016(5) -0.002(4) 0.013(4) 0.003(5)
C93 0.018(5) 0.025(5) 0.032(6) 0.013(5) 0.003(5) -0.001(4)
C94 0.023(5) 0.016(5) 0.019(5) 0.002(4) 0.008(4) 0.003(4)
C95 0.010(4) 0.010(3) 0.007(4) -0.002(3) -0.001(3) -0.005(3)
C96 0.014(5) 0.013(4) 0.028(6) 0.006(4) 0.009(4) 0.006(4)
C97 0.022(6) 0.030(6) 0.043(7) 0.009(5) 0.014(5) 0.016(5)
C98 0.036(6) 0.018(5) 0.047(7) 0.001(5) 0.023(5) 0.007(5)
C99 0.032(6) 0.028(6) 0.080(9) 0.021(6) 0.028(6) 0.018(5)
C100 0.033(6) 0.013(5) 0.030(6) -0.005(4) 0.013(5) -0.007(4)
C101 0.027(6) 0.035(6) 0.038(7) -0.007(5) -0.001(5) -0.002(5)
C102 0.061(9) 0.058(8) 0.045(8) -0.014(6) 0.015(6) 0.015(7)
C103 0.012(5) 0.022(5) 0.011(5) 0.002(4) -0.002(4) 0.007(4)
C104 0.018(5) 0.024(5) 0.019(5) 0.009(4) 0.008(4) 0.005(4)
C105 0.011(5) 0.030(6) 0.033(6) 0.007(5) 0.001(5) -0.007(4)
C106 0.028(6) 0.032(6) 0.024(6) -0.006(5) -0.011(5) 0.010(5)
C107 0.025(6) 0.016(5) 0.017(5) 0.000(4) 0.003(4) 0.002(4)
C108 0.033(6) 0.008(4) 0.007(5) -0.003(4) 0.002(4) 0.000(4)
C109 0.020(5) 0.017(5) 0.018(5) 0.007(4) 0.000(4) -0.001(4)
C110 0.044(7) 0.045(6) 0.023(6) 0.015(5) 0.013(5) 0.021(5)
C111 0.016(5) 0.027(5) 0.018(5) 0.006(4) 0.008(4) 0.007(4)
C112 0.025(6) 0.039(6) 0.024(6) 0.009(5) 0.010(5) 0.010(5)
C113 0.032(6) 0.026(5) 0.015(5) 0.015(4) 0.004(4) 0.012(5)
C114 0.030(6) 0.018(5) 0.038(6) -0.002(5) 0.004(5) 0.000(4)
C115 0.032(6) 0.030(6) 0.042(7) 0.005(5) 0.018(5) 0.019(5)
C116 0.081(10) 0.053(8) 0.067(9) -0.011(7) 0.049(8) -0.014(7)
C117 0.038(10) 0.226(19) 0.108(14) -0.096(13) 0.039(9) -0.017(11)
N1 0.017(4) 0.013(4) 0.020(4) -0.003(3) 0.006(3) 0.005(3)
N2 0.032(5) 0.028(4) 0.014(4) 0.005(4) -0.002(4) 0.014(4)
N3 0.024(4) 0.024(4) 0.009(4) 0.000(3) 0.004(3) 0.009(3)
N4 0.014(4) 0.013(4) 0.015(4) -0.001(3) -0.002(3) 0.001(3)
N5 0.018(4) 0.016(4) 0.012(4) 0.004(3) 0.008(3) 0.007(3)
N6 0.022(4) 0.012(4) 0.024(5) 0.002(3) 0.001(4) 0.002(3)
N7 0.018(4) 0.009(4) 0.028(5) 0.005(3) 0.001(4) 0.007(3)
N8 0.016(4) 0.006(4) 0.021(4) 0.005(3) 0.010(3) 0.000(3)
N9 0.011(4) 0.022(4) 0.007(4) 0.000(3) 0.001(3) 0.005(3)
N10 0.028(5) 0.022(4) 0.019(4) 0.009(3) 0.008(4) 0.016(4)
N11 0.018(4) 0.015(4) 0.005(4) 0.002(3) -0.003(3) -0.007(3)
N12 0.012(4) 0.014(4) 0.012(4) -0.005(3) -0.002(3) 0.002(3)
P1 0.0306(15) 0.0299(14) 0.0180(14) 0.0002(11) -0.0012(12) 0.0167(12)
P2 0.0283(15) 0.0163(13) 0.0159(14) -0.0003(11) 0.0015(11) 0.0036(11)
P3 0.0245(15) 0.0347(15) 0.0215(15) -0.0026(12) 0.0031(12) 0.0047(12)
P4 0.0214(14) 0.0160(12) 0.0212(14) 0.0001(11) 0.0038(11) 0.0068(11)
P5 0.0238(14) 0.0141(12) 0.0216(14) 0.0033(11) 0.0058(11) 0.0036(11)
P6 0.0233(15) 0.0342(15) 0.0141(14) 0.0008(12) 0.0016(11) -0.0011(12)
P7 0.0199(14) 0.0297(14) 0.0172(14) 0.0027(11) 0.0016(11) 0.0072(11)
P8 0.0161(13) 0.0213(13) 0.0165(13) 0.0058(11) 0.0035(10) 0.0064(11)
P9 0.0196(14) 0.0157(12) 0.0253(15) 0.0015(11) 0.0079(11) 0.0051(11)
Cl1 0.0162(12) 0.0250(12) 0.0274(14) -0.0007(10) 0.0035(10) 0.0035(10)
Cl2 0.0366(15) 0.0344(13) 0.0179(13) 0.0045(11) 0.0051(11) 0.0210(12)
Cl3 0.0350(15) 0.0361(14) 0.0133(13) -0.0024(11) 0.0005(11) 0.0136(12)
U1 0.01500(19) 0.01408(17) 0.01370(19) 0.00361(14) 0.00300(15) 0.00406(14)
U2 0.0198(2) 0.01269(18) 0.0153(2) 0.00361(15) 0.00436(15) 0.00442(15)
U3 0.0220(2) 0.01586(18) 0.01257(19) 0.00045(15) 0.00168(15) 0.00579(15)
 
_geom_special_details
;
 All esds (except the esd in the dihedral angle between two l.s. planes)
 are estimated using the full covariance matrix.  The cell esds are taken
 into account individually in the estimation of esds in distances, angles
 and torsion angles; correlations between esds in cell parameters are only
 used when they are defined by crystal symmetry.  An approximate (isotropic)
 treatment of cell esds is used for estimating esds involving l.s. planes.
;
 
loop_
 _geom_bond_atom_site_label_1
 _geom_bond_atom_site_label_2
 _geom_bond_distance
 _geom_bond_site_symmetry_2
 _geom_bond_publ_flag
C1 C2 1.535(12) . ?
C1 C3 1.535(11) . ?
C1 P1 1.851(9) . ?
C1 H1 1.0000 . ?
C2 H2A 0.9800 . ?
C2 H2B 0.9800 . ?
C2 H2C 0.9800 . ?
C3 H3A 0.9800 . ?
C3 H3B 0.9800 . ?
C3 H3C 0.9800 . ?
C4 C117 1.492(16) . ?
C4 C5 1.528(13) . ?
C4 P1 1.849(10) . ?
C4 H4 1.0000 . ?
C5 H5A 0.9800 . ?
C5 H5B 0.9800 . ?
C5 H5C 0.9800 . ?
C6 N2 1.454(10) . ?
C6 P1 1.858(9) . ?
C6 H6A 0.9900 . ?
C6 H6B 0.9900 . ?
C7 N2 1.382(10) . ?
C7 C11 1.418(11) . ?
C7 C8 1.430(10) . ?
C8 C9 1.365(11) . ?
C8 N4 1.484(9) . ?
C9 C10 1.391(10) . ?
C9 H9 0.9500 . ?
C10 C12 1.354(11) . ?
C10 H10 0.9500 . ?
C11 C12 1.376(12) . ?
C11 H11 0.9500 . ?
C12 H12 0.9500 . ?
C13 C14 1.377(11) . ?
C13 C18 1.413(11) . ?
C13 N4 1.480(10) . ?
C14 C15 1.396(11) . ?
C14 H14 0.9500 . ?
C15 C16 1.374(11) . ?
C15 H15 0.9500 . ?
C16 C17 1.403(11) . ?
C16 H16 0.9500 . ?
C17 C18 1.390(11) . ?
C17 H17 0.9500 . ?
C18 N1 1.388(10) . ?
C19 N1 1.447(9) . ?
C19 P2 1.828(8) . ?
C19 H19A 0.9900 . ?
C19 H19B 0.9900 . ?
C20 C21 1.513(11) . ?
C20 H20A 0.9800 . ?
C20 H20B 0.9800 . ?
C20 H20C 0.9800 . ?
C21 C22 1.538(11) . ?
C21 P2 1.841(8) . ?
C21 H21 1.0000 . ?
C22 H22A 0.9800 . ?
C22 H22B 0.9800 . ?
C22 H22C 0.9800 . ?
C23 C25 1.498(11) . ?
C23 C24 1.546(11) . ?
C23 P2 1.840(8) . ?
C23 H23 1.0000 . ?
C24 H24A 0.9800 . ?
C24 H24B 0.9800 . ?
C24 H24C 0.9800 . ?
C25 H25A 0.9800 . ?
C25 H25B 0.9800 . ?
C25 H25C 0.9800 . ?
C26 C27 1.382(11) . ?
C26 C31 1.385(11) . ?
C26 H26 0.9500 . ?
C27 C28 1.362(10) . ?
C27 H27 0.9500 . ?
C28 C29 1.405(11) . ?
C28 N4 1.490(10) . ?
C29 C30 1.396(11) . ?
C29 N3 1.397(9) . ?
C30 C31 1.382(11) . ?
C30 H30 0.9500 . ?
C31 H31 0.9500 . ?
C32 N3 1.473(10) . ?
C32 P3 1.896(9) . ?
C32 H32A 0.9900 . ?
C32 H32B 0.9900 . ?
C33 C34 1.534(12) . ?
C33 H33A 0.9800 . ?
C33 H33B 0.9800 . ?
C33 H33C 0.9800 . ?
C34 C35 1.509(12) . ?
C34 P3 1.865(9) . ?
C34 H34 1.0000 . ?
C35 H35A 0.9800 . ?
C35 H35B 0.9800 . ?
C35 H35C 0.9800 . ?
C36 C37 1.516(12) . ?
C36 H36A 0.9800 . ?
C36 H36B 0.9800 . ?
C36 H36C 0.9800 . ?
C37 C38 1.520(12) . ?
C37 P3 1.850(9) . ?
C37 H37 1.0000 . ?
C38 H38A 0.9800 . ?
C38 H38B 0.9800 . ?
C38 H38C 0.9800 . ?
C39 C40 1.543(10) . ?
C39 H39A 0.9800 . ?
C39 H39B 0.9800 . ?
C39 H39C 0.9800 . ?
C40 C41 1.530(12) . ?
C40 P4 1.836(8) . ?
C40 H40 1.0000 . ?
C41 H41A 0.9800 . ?
C41 H41B 0.9800 . ?
C41 H41C 0.9800 . ?
C42 C116 1.504(12) . ?
C42 C43 1.516(12) . ?
C42 P4 1.842(9) . ?
C42 H42 1.0000 . ?
C43 H43A 0.9800 . ?
C43 H43B 0.9800 . ?
C43 H43C 0.9800 . ?
C44 N7 1.454(9) . ?
C44 P4 1.858(8) . ?
C44 H44A 0.9900 . ?
C44 H44B 0.9900 . ?
C45 N7 1.384(10) . ?
C45 C50 1.390(11) . ?
C45 C46 1.406(10) . ?
C46 C47 1.383(11) . ?
C46 H46 0.9500 . ?
C47 C48 1.372(10) . ?
C47 H47 0.9500 . ?
C48 C49 1.397(10) . ?
C48 H48 0.9500 . ?
C49 C50 1.411(11) . ?
C49 H49 0.9500 . ?
C50 N8 1.484(9) . ?
C51 C52 1.395(11) . ?
C51 C56 1.400(11) . ?
C51 N8 1.451(10) . ?
C52 C53 1.404(12) . ?
C52 H52 0.9500 . ?
C53 C54 1.385(12) . ?
C53 H53 0.9500 . ?
C54 C55 1.369(11) . ?
C54 H54 0.9500 . ?
C55 C56 1.389(11) . ?
C55 H55 0.9500 . ?
C56 N6 1.383(10) . ?
C57 N6 1.460(9) . ?
C57 P5 1.855(8) . ?
C57 H57A 0.9900 . ?
C57 H57B 0.9900 . ?
C58 C59 1.513(12) . ?
C58 C60 1.567(11) . ?
C58 P5 1.830(7) . ?
C58 H58 1.0000 . ?
C59 H59A 0.9800 . ?
C59 H59B 0.9800 . ?
C59 H59C 0.9800 . ?
C60 H60A 0.9800 . ?
C60 H60B 0.9800 . ?
C60 H60C 0.9800 . ?
C61 C63 1.534(11) . ?
C61 C62 1.555(11) . ?
C61 P5 1.844(9) . ?
C61 H61 1.0000 . ?
C62 H62A 0.9800 . ?
C62 H62B 0.9800 . ?
C62 H62C 0.9800 . ?
C63 H63A 0.9800 . ?
C63 H63B 0.9800 . ?
C63 H63C 0.9800 . ?
C64 C65 1.375(11) . ?
C64 C69 1.410(11) . ?
C64 N8 1.466(10) . ?
C65 C66 1.386(11) . ?
C65 H65 0.9500 . ?
C66 C67 1.386(12) . ?
C66 H66 0.9500 . ?
C67 C68 1.386(11) . ?
C67 H67 0.9500 . ?
C68 C69 1.389(10) . ?
C68 H68 0.9500 . ?
C69 N5 1.403(9) . ?
C70 N5 1.448(9) . ?
C70 P6 1.896(8) . ?
C70 H70A 0.9900 . ?
C70 H70B 0.9900 . ?
C71 C73 1.507(13) . ?
C71 C72 1.539(12) . ?
C71 P6 1.878(9) . ?
C71 H71 1.0000 . ?
C72 H72A 0.9800 . ?
C72 H72B 0.9800 . ?
C72 H72C 0.9800 . ?
C73 H73A 0.9800 . ?
C73 H73B 0.9800 . ?
C73 H73C 0.9800 . ?
C74 C75 1.504(11) . ?
C74 H74A 0.9800 . ?
C74 H74B 0.9800 . ?
C74 H74C 0.9800 . ?
C75 C76 1.520(11) . ?
C75 P6 1.869(8) . ?
C75 H75 1.0000 . ?
C76 H76A 0.9800 . ?
C76 H76B 0.9800 . ?
C76 H76C 0.9800 . ?
C77 C78 1.381(11) . ?
C77 C82 1.402(11) . ?
C77 N12 1.485(9) . ?
C78 C79 1.399(11) . ?
C78 H78 0.9500 . ?
C79 C80 1.372(12) . ?
C79 H79 0.9500 . ?
C80 C81 1.387(11) . ?
C80 H80 0.9500 . ?
C81 C82 1.425(11) . ?
C81 H81 0.9500 . ?
C82 N9 1.398(10) . ?
C83 N9 1.461(9) . ?
C83 P7 1.846(8) . ?
C83 H83A 0.9900 . ?
C83 H83B 0.9900 . ?
C84 C86 1.511(11) . ?
C84 C85 1.512(10) . ?
C84 P7 1.857(8) . ?
C84 H84 1.0000 . ?
C85 H85A 0.9800 . ?
C85 H85B 0.9800 . ?
C85 H85C 0.9800 . ?
C86 H86A 0.9800 . ?
C86 H86B 0.9800 . ?
C86 H86C 0.9800 . ?
C87 C88 1.527(12) . ?
C87 C89 1.544(11) . ?
C87 P7 1.855(9) . ?
C87 H87 1.0000 . ?
C88 H88A 0.9800 . ?
C88 H88B 0.9800 . ?
C88 H88C 0.9800 . ?
C89 H89A 0.9800 . ?
C89 H89B 0.9800 . ?
C89 H89C 0.9800 . ?
C90 C91 1.375(10) . ?
C90 C95 1.387(10) . ?
C90 N12 1.482(9) . ?
C91 C92 1.389(10) . ?
C91 H91 0.9500 . ?
C92 C93 1.382(11) . ?
C92 H92 0.9500 . ?
C93 C94 1.378(11) . ?
C93 H93 0.9500 . ?
C94 C95 1.403(10) . ?
C94 H94 0.9500 . ?
C95 N10 1.413(9) . ?
C96 N10 1.474(9) . ?
C96 P9 1.842(8) . ?
C96 H96A 0.9900 . ?
C96 H96B 0.9900 . ?
C97 C99 1.486(11) . ?
C97 C98 1.538(11) . ?
C97 P9 1.861(8) . ?
C97 H97 1.0000 . ?
C98 H98A 0.9800 . ?
C98 H98B 0.9800 . ?
C98 H98C 0.9800 . ?
C99 H99A 0.9800 . ?
C99 H99B 0.9800 . ?
C99 H99C 0.9800 . ?
C100 C101 1.525(12) . ?
C100 C102 1.540(12) . ?
C100 P9 1.839(9) . ?
C100 H100 1.0000 . ?
C101 H10A 0.9800 . ?
C101 H10B 0.9800 . ?
C101 H10C 0.9800 . ?
C102 H10D 0.9800 . ?
C102 H10E 0.9800 . ?
C102 H10F 0.9800 . ?
C103 C104 1.379(11) . ?
C103 C108 1.402(11) . ?
C103 N12 1.473(9) . ?
C104 C105 1.377(11) . ?
C104 H104 0.9500 . ?
C105 C106 1.404(12) . ?
C105 H105 0.9500 . ?
C106 C107 1.380(11) . ?
C106 H106 0.9500 . ?
C107 C108 1.399(11) . ?
C107 H107 0.9500 . ?
C108 N11 1.393(10) . ?
C109 N11 1.452(9) . ?
C109 P8 1.859(8) . ?
C109 H10G 0.9900 . ?
C109 H10H 0.9900 . ?
C110 C111 1.519(11) . ?
C110 H11G 0.9800 . ?
C110 H11H 0.9800 . ?
C110 H11I 0.9800 . ?
C111 C112 1.538(10) . ?
C111 P8 1.844(8) . ?
C111 H111 1.0000 . ?
C112 H11A 0.9800 . ?
C112 H11B 0.9800 . ?
C112 H11C 0.9800 . ?
C113 C114 1.523(11) . ?
C113 C115 1.562(11) . ?
C113 P8 1.853(8) . ?
C113 H113 1.0000 . ?
C114 H11J 0.9800 . ?
C114 H11K 0.9800 . ?
C114 H11L 0.9800 . ?
C115 H11D 0.9800 . ?
C115 H11E 0.9800 . ?
C115 H11F 0.9800 . ?
C116 H11M 0.9800 . ?
C116 H11N 0.9800 . ?
C116 H11O 0.9800 . ?
C117 H11P 0.9800 . ?
C117 H11Q 0.9800 . ?
C117 H11R 0.9800 . ?
N1 U3 2.283(6) . ?
N2 U3 2.253(7) . ?
N3 U3 2.268(7) . ?
N4 U3 2.623(6) . ?
N5 U2 2.270(6) . ?
N6 U2 2.296(7) . ?
N7 U2 2.255(6) . ?
N8 U2 2.612(7) . ?
N9 U1 2.258(6) . ?
N10 U1 2.260(6) . ?
N11 U1 2.281(6) . ?
N12 U1 2.611(6) . ?
P1 U3 3.138(2) . ?
P2 U3 3.085(2) . ?
P4 U2 3.145(2) . ?
P5 U2 3.125(2) . ?
P8 U1 3.053(2) . ?
P9 U1 3.130(2) . ?
Cl1 U1 2.672(2) . ?
Cl2 U2 2.687(2) . ?
Cl3 U3 2.667(2) . ?
 
loop_
 _geom_angle_atom_site_label_1
 _geom_angle_atom_site_label_2
 _geom_angle_atom_site_label_3
 _geom_angle
 _geom_angle_site_symmetry_1
 _geom_angle_site_symmetry_3
 _geom_angle_publ_flag
C2 C1 C3 111.5(8) . . ?
C2 C1 P1 112.9(7) . . ?
C3 C1 P1 114.1(6) . . ?
C2 C1 H1 105.9 . . ?
C3 C1 H1 105.9 . . ?
P1 C1 H1 105.9 . . ?
C1 C2 H2A 109.5 . . ?
C1 C2 H2B 109.5 . . ?
H2A C2 H2B 109.5 . . ?
C1 C2 H2C 109.5 . . ?
H2A C2 H2C 109.5 . . ?
H2B C2 H2C 109.5 . . ?
C1 C3 H3A 109.5 . . ?
C1 C3 H3B 109.5 . . ?
H3A C3 H3B 109.5 . . ?
C1 C3 H3C 109.5 . . ?
H3A C3 H3C 109.5 . . ?
H3B C3 H3C 109.5 . . ?
C117 C4 C5 111.2(10) . . ?
C117 C4 P1 110.5(8) . . ?
C5 C4 P1 110.4(7) . . ?
C117 C4 H4 108.2 . . ?
C5 C4 H4 108.2 . . ?
P1 C4 H4 108.2 . . ?
C4 C5 H5A 109.5 . . ?
C4 C5 H5B 109.5 . . ?
H5A C5 H5B 109.5 . . ?
C4 C5 H5C 109.5 . . ?
H5A C5 H5C 109.5 . . ?
H5B C5 H5C 109.5 . . ?
N2 C6 P1 102.8(5) . . ?
N2 C6 H6A 111.2 . . ?
P1 C6 H6A 111.2 . . ?
N2 C6 H6B 111.2 . . ?
P1 C6 H6B 111.2 . . ?
H6A C6 H6B 109.1 . . ?
N2 C7 C11 127.4(8) . . ?
N2 C7 C8 116.8(7) . . ?
C11 C7 C8 115.8(8) . . ?
C9 C8 C7 121.5(7) . . ?
C9 C8 N4 124.3(7) . . ?
C7 C8 N4 114.2(7) . . ?
C8 C9 C10 120.4(7) . . ?
C8 C9 H9 119.8 . . ?
C10 C9 H9 119.8 . . ?
C12 C10 C9 119.7(8) . . ?
C12 C10 H10 120.1 . . ?
C9 C10 H10 120.1 . . ?
C12 C11 C7 121.1(8) . . ?
C12 C11 H11 119.5 . . ?
C7 C11 H11 119.5 . . ?
C10 C12 C11 121.5(8) . . ?
C10 C12 H12 119.3 . . ?
C11 C12 H12 119.3 . . ?
C14 C13 C18 121.8(8) . . ?
C14 C13 N4 121.4(8) . . ?
C18 C13 N4 116.8(7) . . ?
C13 C14 C15 119.1(8) . . ?
C13 C14 H14 120.5 . . ?
C15 C14 H14 120.5 . . ?
C16 C15 C14 120.2(8) . . ?
C16 C15 H15 119.9 . . ?
C14 C15 H15 119.9 . . ?
C15 C16 C17 120.9(8) . . ?
C15 C16 H16 119.6 . . ?
C17 C16 H16 119.6 . . ?
C18 C17 C16 119.9(8) . . ?
C18 C17 H17 120.1 . . ?
C16 C17 H17 120.1 . . ?
N1 C18 C17 124.8(8) . . ?
N1 C18 C13 116.9(8) . . ?
C17 C18 C13 118.2(8) . . ?
N1 C19 P2 102.9(5) . . ?
N1 C19 H19A 111.2 . . ?
P2 C19 H19A 111.2 . . ?
N1 C19 H19B 111.2 . . ?
P2 C19 H19B 111.2 . . ?
H19A C19 H19B 109.1 . . ?
C21 C20 H20A 109.5 . . ?
C21 C20 H20B 109.5 . . ?
H20A C20 H20B 109.5 . . ?
C21 C20 H20C 109.5 . . ?
H20A C20 H20C 109.5 . . ?
H20B C20 H20C 109.5 . . ?
C20 C21 C22 111.2(8) . . ?
C20 C21 P2 109.2(6) . . ?
C22 C21 P2 114.7(6) . . ?
C20 C21 H21 107.1 . . ?
C22 C21 H21 107.1 . . ?
P2 C21 H21 107.1 . . ?
C21 C22 H22A 109.5 . . ?
C21 C22 H22B 109.5 . . ?
H22A C22 H22B 109.5 . . ?
C21 C22 H22C 109.5 . . ?
H22A C22 H22C 109.5 . . ?
H22B C22 H22C 109.5 . . ?
C25 C23 C24 111.4(8) . . ?
C25 C23 P2 110.1(6) . . ?
C24 C23 P2 112.5(6) . . ?
C25 C23 H23 107.6 . . ?
C24 C23 H23 107.6 . . ?
P2 C23 H23 107.6 . . ?
C23 C24 H24A 109.5 . . ?
C23 C24 H24B 109.5 . . ?
H24A C24 H24B 109.5 . . ?
C23 C24 H24C 109.5 . . ?
H24A C24 H24C 109.5 . . ?
H24B C24 H24C 109.5 . . ?
C23 C25 H25A 109.5 . . ?
C23 C25 H25B 109.5 . . ?
H25A C25 H25B 109.5 . . ?
C23 C25 H25C 109.5 . . ?
H25A C25 H25C 109.5 . . ?
H25B C25 H25C 109.5 . . ?
C27 C26 C31 118.9(8) . . ?
C27 C26 H26 120.6 . . ?
C31 C26 H26 120.6 . . ?
C28 C27 C26 119.9(8) . . ?
C28 C27 H27 120.0 . . ?
C26 C27 H27 120.0 . . ?
C27 C28 C29 122.0(8) . . ?
C27 C28 N4 122.2(8) . . ?
C29 C28 N4 115.8(7) . . ?
C30 C29 N3 124.9(8) . . ?
C30 C29 C28 118.0(8) . . ?
N3 C29 C28 117.0(7) . . ?
C31 C30 C29 119.1(8) . . ?
C31 C30 H30 120.5 . . ?
C29 C30 H30 120.5 . . ?
C30 C31 C26 122.0(8) . . ?
C30 C31 H31 119.0 . . ?
C26 C31 H31 119.0 . . ?
N3 C32 P3 114.6(6) . . ?
N3 C32 H32A 108.6 . . ?
P3 C32 H32A 108.6 . . ?
N3 C32 H32B 108.6 . . ?
P3 C32 H32B 108.6 . . ?
H32A C32 H32B 107.6 . . ?
C34 C33 H33A 109.5 . . ?
C34 C33 H33B 109.5 . . ?
H33A C33 H33B 109.5 . . ?
C34 C33 H33C 109.5 . . ?
H33A C33 H33C 109.5 . . ?
H33B C33 H33C 109.5 . . ?
C35 C34 C33 109.5(8) . . ?
C35 C34 P3 112.3(7) . . ?
C33 C34 P3 108.3(6) . . ?
C35 C34 H34 108.9 . . ?
C33 C34 H34 108.9 . . ?
P3 C34 H34 108.9 . . ?
C34 C35 H35A 109.5 . . ?
C34 C35 H35B 109.5 . . ?
H35A C35 H35B 109.5 . . ?
C34 C35 H35C 109.5 . . ?
H35A C35 H35C 109.5 . . ?
H35B C35 H35C 109.5 . . ?
C37 C36 H36A 109.5 . . ?
C37 C36 H36B 109.5 . . ?
H36A C36 H36B 109.5 . . ?
C37 C36 H36C 109.5 . . ?
H36A C36 H36C 109.5 . . ?
H36B C36 H36C 109.5 . . ?
C36 C37 C38 111.1(8) . . ?
C36 C37 P3 111.6(7) . . ?
C38 C37 P3 116.7(6) . . ?
C36 C37 H37 105.5 . . ?
C38 C37 H37 105.5 . . ?
P3 C37 H37 105.5 . . ?
C37 C38 H38A 109.5 . . ?
C37 C38 H38B 109.5 . . ?
H38A C38 H38B 109.5 . . ?
C37 C38 H38C 109.5 . . ?
H38A C38 H38C 109.5 . . ?
H38B C38 H38C 109.5 . . ?
C40 C39 H39A 109.5 . . ?
C40 C39 H39B 109.5 . . ?
H39A C39 H39B 109.5 . . ?
C40 C39 H39C 109.5 . . ?
H39A C39 H39C 109.5 . . ?
H39B C39 H39C 109.5 . . ?
C41 C40 C39 110.6(7) . . ?
C41 C40 P4 112.8(6) . . ?
C39 C40 P4 115.7(6) . . ?
C41 C40 H40 105.6 . . ?
C39 C40 H40 105.6 . . ?
P4 C40 H40 105.6 . . ?
C40 C41 H41A 109.5 . . ?
C40 C41 H41B 109.5 . . ?
H41A C41 H41B 109.5 . . ?
C40 C41 H41C 109.5 . . ?
H41A C41 H41C 109.5 . . ?
H41B C41 H41C 109.5 . . ?
C116 C42 C43 109.6(9) . . ?
C116 C42 P4 112.3(7) . . ?
C43 C42 P4 111.1(6) . . ?
C116 C42 H42 107.9 . . ?
C43 C42 H42 107.9 . . ?
P4 C42 H42 107.9 . . ?
C42 C43 H43A 109.5 . . ?
C42 C43 H43B 109.5 . . ?
H43A C43 H43B 109.5 . . ?
C42 C43 H43C 109.5 . . ?
H43A C43 H43C 109.5 . . ?
H43B C43 H43C 109.5 . . ?
N7 C44 P4 104.2(5) . . ?
N7 C44 H44A 110.9 . . ?
P4 C44 H44A 110.9 . . ?
N7 C44 H44B 110.9 . . ?
P4 C44 H44B 110.9 . . ?
H44A C44 H44B 108.9 . . ?
N7 C45 C50 116.3(7) . . ?
N7 C45 C46 125.6(7) . . ?
C50 C45 C46 117.8(8) . . ?
C47 C46 C45 120.4(8) . . ?
C47 C46 H46 119.8 . . ?
C45 C46 H46 119.8 . . ?
C48 C47 C46 122.1(8) . . ?
C48 C47 H47 119.0 . . ?
C46 C47 H47 119.0 . . ?
C47 C48 C49 118.9(8) . . ?
C47 C48 H48 120.6 . . ?
C49 C48 H48 120.6 . . ?
C48 C49 C50 119.4(7) . . ?
C48 C49 H49 120.3 . . ?
C50 C49 H49 120.3 . . ?
C45 C50 C49 121.4(7) . . ?
C45 C50 N8 116.2(7) . . ?
C49 C50 N8 122.4(7) . . ?
C52 C51 C56 121.0(8) . . ?
C52 C51 N8 123.2(8) . . ?
C56 C51 N8 115.8(7) . . ?
C51 C52 C53 119.6(8) . . ?
C51 C52 H52 120.2 . . ?
C53 C52 H52 120.2 . . ?
C54 C53 C52 118.7(9) . . ?
C54 C53 H53 120.6 . . ?
C52 C53 H53 120.6 . . ?
C55 C54 C53 121.3(9) . . ?
C55 C54 H54 119.3 . . ?
C53 C54 H54 119.3 . . ?
C54 C55 C56 121.2(8) . . ?
C54 C55 H55 119.4 . . ?
C56 C55 H55 119.4 . . ?
N6 C56 C55 124.7(8) . . ?
N6 C56 C51 117.1(8) . . ?
C55 C56 C51 118.1(8) . . ?
N6 C57 P5 103.9(5) . . ?
N6 C57 H57A 111.0 . . ?
P5 C57 H57A 111.0 . . ?
N6 C57 H57B 111.0 . . ?
P5 C57 H57B 111.0 . . ?
H57A C57 H57B 109.0 . . ?
C59 C58 C60 110.8(8) . . ?
C59 C58 P5 109.6(6) . . ?
C60 C58 P5 111.0(6) . . ?
C59 C58 H58 108.5 . . ?
C60 C58 H58 108.5 . . ?
P5 C58 H58 108.5 . . ?
C58 C59 H59A 109.5 . . ?
C58 C59 H59B 109.5 . . ?
H59A C59 H59B 109.5 . . ?
C58 C59 H59C 109.5 . . ?
H59A C59 H59C 109.5 . . ?
H59B C59 H59C 109.5 . . ?
C58 C60 H60A 109.5 . . ?
C58 C60 H60B 109.5 . . ?
H60A C60 H60B 109.5 . . ?
C58 C60 H60C 109.5 . . ?
H60A C60 H60C 109.5 . . ?
H60B C60 H60C 109.5 . . ?
C63 C61 C62 110.7(7) . . ?
C63 C61 P5 114.6(6) . . ?
C62 C61 P5 108.8(6) . . ?
C63 C61 H61 107.5 . . ?
C62 C61 H61 107.5 . . ?
P5 C61 H61 107.5 . . ?
C61 C62 H62A 109.5 . . ?
C61 C62 H62B 109.5 . . ?
H62A C62 H62B 109.5 . . ?
C61 C62 H62C 109.5 . . ?
H62A C62 H62C 109.5 . . ?
H62B C62 H62C 109.5 . . ?
C61 C63 H63A 109.5 . . ?
C61 C63 H63B 109.5 . . ?
H63A C63 H63B 109.5 . . ?
C61 C63 H63C 109.5 . . ?
H63A C63 H63C 109.5 . . ?
H63B C63 H63C 109.5 . . ?
C65 C64 C69 120.5(8) . . ?
C65 C64 N8 123.7(8) . . ?
C69 C64 N8 115.7(7) . . ?
C64 C65 C66 120.7(8) . . ?
C64 C65 H65 119.7 . . ?
C66 C65 H65 119.7 . . ?
C67 C66 C65 119.1(8) . . ?
C67 C66 H66 120.4 . . ?
C65 C66 H66 120.4 . . ?
C66 C67 C68 120.5(8) . . ?
C66 C67 H67 119.8 . . ?
C68 C67 H67 119.8 . . ?
C67 C68 C69 120.8(8) . . ?
C67 C68 H68 119.6 . . ?
C69 C68 H68 119.6 . . ?
C68 C69 N5 124.1(8) . . ?
C68 C69 C64 118.0(8) . . ?
N5 C69 C64 117.9(7) . . ?
N5 C70 P6 114.4(5) . . ?
N5 C70 H70A 108.7 . . ?
P6 C70 H70A 108.7 . . ?
N5 C70 H70B 108.7 . . ?
P6 C70 H70B 108.7 . . ?
H70A C70 H70B 107.6 . . ?
C73 C71 C72 111.6(9) . . ?
C73 C71 P6 116.7(7) . . ?
C72 C71 P6 110.4(8) . . ?
C73 C71 H71 105.8 . . ?
C72 C71 H71 105.8 . . ?
P6 C71 H71 105.8 . . ?
C71 C72 H72A 109.5 . . ?
C71 C72 H72B 109.5 . . ?
H72A C72 H72B 109.5 . . ?
C71 C72 H72C 109.5 . . ?
H72A C72 H72C 109.5 . . ?
H72B C72 H72C 109.5 . . ?
C71 C73 H73A 109.5 . . ?
C71 C73 H73B 109.5 . . ?
H73A C73 H73B 109.5 . . ?
C71 C73 H73C 109.5 . . ?
H73A C73 H73C 109.5 . . ?
H73B C73 H73C 109.5 . . ?
C75 C74 H74A 109.5 . . ?
C75 C74 H74B 109.5 . . ?
H74A C74 H74B 109.5 . . ?
C75 C74 H74C 109.5 . . ?
H74A C74 H74C 109.5 . . ?
H74B C74 H74C 109.5 . . ?
C74 C75 C76 110.9(7) . . ?
C74 C75 P6 113.4(6) . . ?
C76 C75 P6 110.4(6) . . ?
C74 C75 H75 107.3 . . ?
C76 C75 H75 107.3 . . ?
P6 C75 H75 107.3 . . ?
C75 C76 H76A 109.5 . . ?
C75 C76 H76B 109.5 . . ?
H76A C76 H76B 109.5 . . ?
C75 C76 H76C 109.5 . . ?
H76A C76 H76C 109.5 . . ?
H76B C76 H76C 109.5 . . ?
C78 C77 C82 122.1(8) . . ?
C78 C77 N12 122.3(7) . . ?
C82 C77 N12 115.6(7) . . ?
C77 C78 C79 119.5(8) . . ?
C77 C78 H78 120.3 . . ?
C79 C78 H78 120.3 . . ?
C80 C79 C78 119.3(8) . . ?
C80 C79 H79 120.3 . . ?
C78 C79 H79 120.3 . . ?
C79 C80 C81 122.1(8) . . ?
C79 C80 H80 118.9 . . ?
C81 C80 H80 118.9 . . ?
C80 C81 C82 119.4(8) . . ?
C80 C81 H81 120.3 . . ?
C82 C81 H81 120.3 . . ?
N9 C82 C77 118.4(7) . . ?
N9 C82 C81 124.2(8) . . ?
C77 C82 C81 117.4(8) . . ?
N9 C83 P7 114.9(5) . . ?
N9 C83 H83A 108.5 . . ?
P7 C83 H83A 108.5 . . ?
N9 C83 H83B 108.5 . . ?
P7 C83 H83B 108.5 . . ?
H83A C83 H83B 107.5 . . ?
C86 C84 C85 110.3(7) . . ?
C86 C84 P7 110.8(6) . . ?
C85 C84 P7 108.5(6) . . ?
C86 C84 H84 109.1 . . ?
C85 C84 H84 109.1 . . ?
P7 C84 H84 109.1 . . ?
C84 C85 H85A 109.5 . . ?
C84 C85 H85B 109.5 . . ?
H85A C85 H85B 109.5 . . ?
C84 C85 H85C 109.5 . . ?
H85A C85 H85C 109.5 . . ?
H85B C85 H85C 109.5 . . ?
C84 C86 H86A 109.5 . . ?
C84 C86 H86B 109.5 . . ?
H86A C86 H86B 109.5 . . ?
C84 C86 H86C 109.5 . . ?
H86A C86 H86C 109.5 . . ?
H86B C86 H86C 109.5 . . ?
C88 C87 C89 109.1(7) . . ?
C88 C87 P7 117.0(6) . . ?
C89 C87 P7 111.8(6) . . ?
C88 C87 H87 106.0 . . ?
C89 C87 H87 106.0 . . ?
P7 C87 H87 106.0 . . ?
C87 C88 H88A 109.5 . . ?
C87 C88 H88B 109.5 . . ?
H88A C88 H88B 109.5 . . ?
C87 C88 H88C 109.5 . . ?
H88A C88 H88C 109.5 . . ?
H88B C88 H88C 109.5 . . ?
C87 C89 H89A 109.5 . . ?
C87 C89 H89B 109.5 . . ?
H89A C89 H89B 109.5 . . ?
C87 C89 H89C 109.5 . . ?
H89A C89 H89C 109.5 . . ?
H89B C89 H89C 109.5 . . ?
C91 C90 C95 121.4(7) . . ?
C91 C90 N12 121.9(7) . . ?
C95 C90 N12 116.6(7) . . ?
C90 C91 C92 119.6(8) . . ?
C90 C91 H91 120.2 . . ?
C92 C91 H91 120.2 . . ?
C93 C92 C91 119.2(8) . . ?
C93 C92 H92 120.4 . . ?
C91 C92 H92 120.4 . . ?
C94 C93 C92 121.7(8) . . ?
C94 C93 H93 119.2 . . ?
C92 C93 H93 119.2 . . ?
C93 C94 C95 119.0(8) . . ?
C93 C94 H94 120.5 . . ?
C95 C94 H94 120.5 . . ?
C90 C95 C94 119.0(7) . . ?
C90 C95 N10 116.0(7) . . ?
C94 C95 N10 124.7(7) . . ?
N10 C96 P9 102.9(5) . . ?
N10 C96 H96A 111.2 . . ?
P9 C96 H96A 111.2 . . ?
N10 C96 H96B 111.2 . . ?
P9 C96 H96B 111.2 . . ?
H96A C96 H96B 109.1 . . ?
C99 C97 C98 113.7(7) . . ?
C99 C97 P9 115.1(6) . . ?
C98 C97 P9 112.6(6) . . ?
C99 C97 H97 104.7 . . ?
C98 C97 H97 104.7 . . ?
P9 C97 H97 104.7 . . ?
C97 C98 H98A 109.5 . . ?
C97 C98 H98B 109.5 . . ?
H98A C98 H98B 109.5 . . ?
C97 C98 H98C 109.5 . . ?
H98A C98 H98C 109.5 . . ?
H98B C98 H98C 109.5 . . ?
C97 C99 H99A 109.5 . . ?
C97 C99 H99B 109.5 . . ?
H99A C99 H99B 109.5 . . ?
C97 C99 H99C 109.5 . . ?
H99A C99 H99C 109.5 . . ?
H99B C99 H99C 109.5 . . ?
C101 C100 C102 108.8(8) . . ?
C101 C100 P9 108.0(6) . . ?
C102 C100 P9 112.4(6) . . ?
C101 C100 H100 109.2 . . ?
C102 C100 H100 109.2 . . ?
P9 C100 H100 109.2 . . ?
C100 C101 H10A 109.5 . . ?
C100 C101 H10B 109.5 . . ?
H10A C101 H10B 109.5 . . ?
C100 C101 H10C 109.5 . . ?
H10A C101 H10C 109.5 . . ?
H10B C101 H10C 109.5 . . ?
C100 C102 H10D 109.5 . . ?
C100 C102 H10E 109.5 . . ?
H10D C102 H10E 109.5 . . ?
C100 C102 H10F 109.5 . . ?
H10D C102 H10F 109.5 . . ?
H10E C102 H10F 109.5 . . ?
C104 C103 C108 121.1(8) . . ?
C104 C103 N12 122.4(7) . . ?
C108 C103 N12 116.5(7) . . ?
C105 C104 C103 120.7(8) . . ?
C105 C104 H104 119.7 . . ?
C103 C104 H104 119.7 . . ?
C104 C105 C106 118.4(8) . . ?
C104 C105 H105 120.8 . . ?
C106 C105 H105 120.8 . . ?
C107 C106 C105 121.6(8) . . ?
C107 C106 H106 119.2 . . ?
C105 C106 H106 119.2 . . ?
C106 C107 C108 119.5(8) . . ?
C106 C107 H107 120.2 . . ?
C108 C107 H107 120.2 . . ?
N11 C108 C107 124.1(8) . . ?
N11 C108 C103 117.3(7) . . ?
C107 C108 C103 118.6(8) . . ?
N11 C109 P8 100.8(5) . . ?
N11 C109 H10G 111.6 . . ?
P8 C109 H10G 111.6 . . ?
N11 C109 H10H 111.6 . . ?
P8 C109 H10H 111.6 . . ?
H10G C109 H10H 109.4 . . ?
C111 C110 H11G 109.5 . . ?
C111 C110 H11H 109.5 . . ?
H11G C110 H11H 109.5 . . ?
C111 C110 H11I 109.5 . . ?
H11G C110 H11I 109.5 . . ?
H11H C110 H11I 109.5 . . ?
C110 C111 C112 112.1(7) . . ?
C110 C111 P8 108.1(6) . . ?
C112 C111 P8 114.9(6) . . ?
C110 C111 H111 107.1 . . ?
C112 C111 H111 107.1 . . ?
P8 C111 H111 107.1 . . ?
C111 C112 H11A 109.5 . . ?
C111 C112 H11B 109.5 . . ?
H11A C112 H11B 109.5 . . ?
C111 C112 H11C 109.5 . . ?
H11A C112 H11C 109.5 . . ?
H11B C112 H11C 109.5 . . ?
C114 C113 C115 113.1(7) . . ?
C114 C113 P8 110.5(6) . . ?
C115 C113 P8 109.7(5) . . ?
C114 C113 H113 107.8 . . ?
C115 C113 H113 107.8 . . ?
P8 C113 H113 107.8 . . ?
C113 C114 H11J 109.5 . . ?
C113 C114 H11K 109.5 . . ?
H11J C114 H11K 109.5 . . ?
C113 C114 H11L 109.5 . . ?
H11J C114 H11L 109.5 . . ?
H11K C114 H11L 109.5 . . ?
C113 C115 H11D 109.5 . . ?
C113 C115 H11E 109.5 . . ?
H11D C115 H11E 109.5 . . ?
C113 C115 H11F 109.5 . . ?
H11D C115 H11F 109.5 . . ?
H11E C115 H11F 109.5 . . ?
C42 C116 H11M 109.5 . . ?
C42 C116 H11N 109.5 . . ?
H11M C116 H11N 109.5 . . ?
C42 C116 H11O 109.5 . . ?
H11M C116 H11O 109.5 . . ?
H11N C116 H11O 109.5 . . ?
C4 C117 H11P 109.5 . . ?
C4 C117 H11Q 109.5 . . ?
H11P C117 H11Q 109.5 . . ?
C4 C117 H11R 109.5 . . ?
H11P C117 H11R 109.5 . . ?
H11Q C117 H11R 109.5 . . ?
C18 N1 C19 119.1(7) . . ?
C18 N1 U3 120.2(5) . . ?
C19 N1 U3 118.7(5) . . ?
C7 N2 C6 120.1(7) . . ?
C7 N2 U3 120.8(5) . . ?
C6 N2 U3 116.7(5) . . ?
C29 N3 C32 117.6(7) . . ?
C29 N3 U3 122.1(5) . . ?
C32 N3 U3 118.3(5) . . ?
C13 N4 C8 113.8(6) . . ?
C13 N4 C28 113.0(6) . . ?
C8 N4 C28 111.6(6) . . ?
C13 N4 U3 104.9(5) . . ?
C8 N4 U3 106.3(4) . . ?
C28 N4 U3 106.5(5) . . ?
C69 N5 C70 118.7(7) . . ?
C69 N5 U2 117.5(5) . . ?
C70 N5 U2 121.3(5) . . ?
C56 N6 C57 119.3(7) . . ?
C56 N6 U2 120.9(5) . . ?
C57 N6 U2 118.9(5) . . ?
C45 N7 C44 120.0(6) . . ?
C45 N7 U2 121.5(5) . . ?
C44 N7 U2 117.4(5) . . ?
C51 N8 C64 112.7(6) . . ?
C51 N8 C50 112.9(6) . . ?
C64 N8 C50 112.8(6) . . ?
C51 N8 U2 107.5(5) . . ?
C64 N8 U2 104.9(5) . . ?
C50 N8 U2 105.3(4) . . ?
C82 N9 C83 117.1(6) . . ?
C82 N9 U1 118.1(5) . . ?
C83 N9 U1 123.1(5) . . ?
C95 N10 C96 119.1(6) . . ?
C95 N10 U1 120.8(5) . . ?
C96 N10 U1 118.5(5) . . ?
C108 N11 C109 119.0(6) . . ?
C108 N11 U1 121.5(5) . . ?
C109 N11 U1 118.7(5) . . ?
C103 N12 C90 113.5(6) . . ?
C103 N12 C77 113.0(6) . . ?
C90 N12 C77 111.7(6) . . ?
C103 N12 U1 107.5(5) . . ?
C90 N12 U1 105.5(4) . . ?
C77 N12 U1 104.7(4) . . ?
C4 P1 C1 105.8(4) . . ?
C4 P1 C6 103.2(5) . . ?
C1 P1 C6 103.2(4) . . ?
C4 P1 U3 127.7(3) . . ?
C1 P1 U3 126.0(3) . . ?
C6 P1 U3 74.3(3) . . ?
C19 P2 C23 103.9(4) . . ?
C19 P2 C21 105.7(4) . . ?
C23 P2 C21 105.7(4) . . ?
C19 P2 U3 77.8(3) . . ?
C23 P2 U3 118.9(3) . . ?
C21 P2 U3 133.2(3) . . ?
C37 P3 C34 104.9(4) . . ?
C37 P3 C32 100.7(4) . . ?
C34 P3 C32 97.4(4) . . ?
C40 P4 C42 106.8(4) . . ?
C40 P4 C44 102.6(4) . . ?
C42 P4 C44 102.4(4) . . ?
C40 P4 U2 126.8(3) . . ?
C42 P4 U2 125.9(3) . . ?
C44 P4 U2 74.5(3) . . ?
C58 P5 C61 104.8(4) . . ?
C58 P5 C57 101.9(4) . . ?
C61 P5 C57 105.1(4) . . ?
C58 P5 U2 125.9(3) . . ?
C61 P5 U2 128.0(3) . . ?
C57 P5 U2 77.2(2) . . ?
C75 P6 C71 104.0(4) . . ?
C75 P6 C70 98.4(4) . . ?
C71 P6 C70 99.6(4) . . ?
C83 P7 C87 98.8(4) . . ?
C83 P7 C84 98.4(4) . . ?
C87 P7 C84 105.9(4) . . ?
C111 P8 C113 106.2(4) . . ?
C111 P8 C109 106.6(4) . . ?
C113 P8 C109 103.8(4) . . ?
C111 P8 U1 127.5(2) . . ?
C113 P8 U1 123.6(3) . . ?
C109 P8 U1 78.4(2) . . ?
C100 P9 C96 100.5(4) . . ?
C100 P9 C97 108.2(4) . . ?
C96 P9 C97 101.3(4) . . ?
C100 P9 U1 128.2(3) . . ?
C96 P9 U1 76.3(2) . . ?
C97 P9 U1 123.3(3) . . ?
N9 U1 N10 103.2(2) . . ?
N9 U1 N11 110.2(2) . . ?
N10 U1 N11 102.7(2) . . ?
N9 U1 N12 67.3(2) . . ?
N10 U1 N12 66.2(2) . . ?
N11 U1 N12 66.7(2) . . ?
N9 U1 Cl1 96.09(17) . . ?
N10 U1 Cl1 102.48(17) . . ?
N11 U1 Cl1 137.85(17) . . ?
N12 U1 Cl1 155.41(14) . . ?
N9 U1 P8 101.65(15) . . ?
N10 U1 P8 151.56(18) . . ?
N11 U1 P8 55.22(16) . . ?
N12 U1 P8 112.10(14) . . ?
Cl1 U1 P8 88.30(6) . . ?
N9 U1 P9 151.46(15) . . ?
N10 U1 P9 54.97(17) . . ?
N11 U1 P9 93.85(17) . . ?
N12 U1 P9 111.48(14) . . ?
Cl1 U1 P9 74.12(6) . . ?
P8 U1 P9 104.72(6) . . ?
N7 U2 N5 102.6(2) . . ?
N7 U2 N6 103.9(2) . . ?
N5 U2 N6 107.6(2) . . ?
N7 U2 N8 66.0(2) . . ?
N5 U2 N8 66.9(2) . . ?
N6 U2 N8 65.5(2) . . ?
N7 U2 Cl2 98.71(17) . . ?
N5 U2 Cl2 99.40(17) . . ?
N6 U2 Cl2 139.58(18) . . ?
N8 U2 Cl2 154.80(14) . . ?
N7 U2 P5 152.51(18) . . ?
N5 U2 P5 101.21(15) . . ?
N6 U2 P5 55.35(17) . . ?
N8 U2 P5 112.22(13) . . ?
Cl2 U2 P5 90.66(6) . . ?
N7 U2 P4 55.27(17) . . ?
N5 U2 P4 153.84(15) . . ?
N6 U2 P4 92.67(17) . . ?
N8 U2 P4 109.09(14) . . ?
Cl2 U2 P4 73.41(6) . . ?
P5 U2 P4 103.96(6) . . ?
N2 U3 N3 106.7(2) . . ?
N2 U3 N1 104.5(2) . . ?
N3 U3 N1 103.7(2) . . ?
N2 U3 N4 65.8(2) . . ?
N3 U3 N4 66.5(2) . . ?
N1 U3 N4 66.8(2) . . ?
N2 U3 Cl3 97.81(17) . . ?
N3 U3 Cl3 101.07(17) . . ?
N1 U3 Cl3 139.91(18) . . ?
N4 U3 Cl3 153.16(15) . . ?
N2 U3 P2 151.29(19) . . ?
N3 U3 P2 98.34(16) . . ?
N1 U3 P2 54.85(17) . . ?
N4 U3 P2 113.88(14) . . ?
Cl3 U3 P2 90.83(6) . . ?
N2 U3 P1 54.74(19) . . ?
N3 U3 P1 158.90(16) . . ?
N1 U3 P1 91.80(16) . . ?
N4 U3 P1 108.18(14) . . ?
Cl3 U3 P1 74.49(7) . . ?
P2 U3 P1 102.30(6) . . ?
 
_diffrn_measured_fraction_theta_max    0.982
_diffrn_reflns_theta_full              25.00
_diffrn_measured_fraction_theta_full   0.985
_refine_diff_density_max    0.972
_refine_diff_density_min   -1.479
_refine_diff_density_rms    0.183

# ------ Material relevant to the Complex 4 ------ 

data_shelxl
 
_audit_creation_method            SHELXL-97
_chemical_name_systematic
;
 ?
;
_chemical_name_common             ‘Complex 4’
_chemical_melting_point           ?
_chemical_formula_moiety          '2(C43 H60 Co N4 O4 P3 Th), C7 H8' 
_chemical_formula_sum
  'C93 H128 Co2 N8 O8 P6 Th2'
_chemical_formula_weight          2253.80
 
loop_
 _atom_type_symbol
 _atom_type_description
 _atom_type_scat_dispersion_real
 _atom_type_scat_dispersion_imag
 _atom_type_scat_source
 'C'  'C'   0.0033   0.0016
 'International Tables Vol C Tables 4.2.6.8 and 6.1.1.4'
 'H'  'H'   0.0000   0.0000
 'International Tables Vol C Tables 4.2.6.8 and 6.1.1.4'
 'N'  'N'   0.0061   0.0033
 'International Tables Vol C Tables 4.2.6.8 and 6.1.1.4'
 'O'  'O'   0.0106   0.0060
 'International Tables Vol C Tables 4.2.6.8 and 6.1.1.4'
 'P'  'P'   0.1023   0.0942
 'International Tables Vol C Tables 4.2.6.8 and 6.1.1.4'
 'Co'  'Co'   0.3494   0.9721
 'International Tables Vol C Tables 4.2.6.8 and 6.1.1.4'
 'Th'  'Th'  -7.2400   8.8979
 'International Tables Vol C Tables 4.2.6.8 and 6.1.1.4'
 
_symmetry_cell_setting            Triclinic
_symmetry_space_group_name_H-M    P-1
 
loop_
 _symmetry_equiv_pos_as_xyz
 'x, y, z'
 '-x, -y, -z'
 
_cell_length_a                    11.2506(14)
_cell_length_b                    15.9358(19)
_cell_length_c                    29.701(4)
_cell_angle_alpha                 82.195(6)
_cell_angle_beta                  83.056(6)
_cell_angle_gamma                 83.218(6)
_cell_volume                      5209.0(11)
_cell_formula_units_Z             2
_cell_measurement_temperature     100(2)
_cell_measurement_reflns_used     9703
_cell_measurement_theta_min       2.32
_cell_measurement_theta_max       26.03
 
_exptl_crystal_description        block
_exptl_crystal_colour             colorless
_exptl_crystal_size_max           0.07
_exptl_crystal_size_mid           0.07
_exptl_crystal_size_min           0.05
_exptl_crystal_density_meas       a
_exptl_crystal_density_diffrn     1.437
_exptl_crystal_density_method     'not measured'
_exptl_crystal_F_000              2220
_exptl_absorpt_coefficient_mu     3.332
_exptl_absorpt_correction_type    multi-scan
_exptl_absorpt_correction_T_min   0.8002
_exptl_absorpt_correction_T_max   0.8511
_exptl_absorpt_process_details    SADABS
 
_exptl_special_details
;
 ?
;
 
_diffrn_ambient_temperature       100(2)
_diffrn_radiation_wavelength      0.71073
_diffrn_radiation_type            MoK\a
_diffrn_radiation_source          'fine-focus sealed tube'
_diffrn_radiation_monochromator   'QUAZAR multilayer mirrors'
_diffrn_measurement_device_type   'Bruker APEX-II CCD'
_diffrn_measurement_method        '\f and \w scans'
_diffrn_detector_area_resol_mean  8.366
_diffrn_reflns_number             71236
_diffrn_reflns_av_R_equivalents   0.0536
_diffrn_reflns_av_sigmaI/netI     0.0735
_diffrn_reflns_limit_h_min        -13
_diffrn_reflns_limit_h_max        13
_diffrn_reflns_limit_k_min        -19
_diffrn_reflns_limit_k_max        19
_diffrn_reflns_limit_l_min        -36
_diffrn_reflns_limit_l_max        34
_diffrn_reflns_theta_min          1.30
_diffrn_reflns_theta_max          26.05
_reflns_number_total              19981
_reflns_number_gt                 15123
_reflns_threshold_expression      >2sigma(I)
 
_computing_data_collection        'Bruker APEX2'
_computing_cell_refinement        'Bruker SAINT'
_computing_data_reduction         'Bruker SAINT'
_computing_structure_solution     'SHELXS-97 (Sheldrick, 2008)'
_computing_structure_refinement   'SHELXL-97 (Sheldrick, 2008)'
_computing_molecular_graphics     'ORTEP-32'
_computing_publication_material   'WinGX'
 
_refine_special_details
;
 Refinement of F^2^ against ALL reflections.  The weighted R-factor wR and
 goodness of fit S are based on F^2^, conventional R-factors R are based
 on F, with F set to zero for negative F^2^. The threshold expression of
 F^2^ > 2sigma(F^2^) is used only for calculating R-factors(gt) etc. and is
 not relevant to the choice of reflections for refinement.  R-factors based
 on F^2^ are statistically about twice as large as those based on F, and R-
 factors based on ALL data will be even larger.
;
 
_refine_ls_structure_factor_coef  Fsqd
_refine_ls_matrix_type            full
_refine_ls_weighting_scheme       calc
_refine_ls_weighting_details
 'calc w=1/[\s^2^(Fo^2^)+(0.0269P)^2^+3.8150P] where P=(Fo^2^+2Fc^2^)/3'
_atom_sites_solution_primary      direct
_atom_sites_solution_secondary    difmap
_atom_sites_solution_hydrogens    geom
_refine_ls_hydrogen_treatment     constr
_refine_ls_extinction_method      none
_refine_ls_extinction_coef        ?
_refine_ls_number_reflns          19981
_refine_ls_number_parameters      1062
_refine_ls_number_restraints      6
_refine_ls_R_factor_all           0.0659
_refine_ls_R_factor_gt            0.0423
_refine_ls_wR_factor_ref          0.0765
_refine_ls_wR_factor_gt           0.0715
_refine_ls_goodness_of_fit_ref    1.039
_refine_ls_restrained_S_all       1.040
_refine_ls_shift/su_max           0.002
_refine_ls_shift/su_mean          0.000
 
loop_
 _atom_site_label
 _atom_site_type_symbol
 _atom_site_fract_x
 _atom_site_fract_y
 _atom_site_fract_z
 _atom_site_U_iso_or_equiv
 _atom_site_adp_type
 _atom_site_occupancy
 _atom_site_symmetry_multiplicity
 _atom_site_calc_flag
 _atom_site_refinement_flags
 _atom_site_disorder_assembly
 _atom_site_disorder_group
C029 C 0.3436(5) 0.8797(3) 0.03706(17) 0.0260(13) Uani 1 1 d . . .
H029 H 0.2629 0.8606 0.0490 0.031 Uiso 1 1 calc R . .
C030 C 1.0010(5) 0.9069(3) 0.0606(2) 0.0338(15) Uani 1 1 d . . .
H030 H 1.0792 0.9241 0.0601 0.041 Uiso 1 1 calc R . .
C031 C 0.9224(5) 0.5863(4) 0.08211(18) 0.0303(14) Uani 1 1 d . . .
H031 H 0.9719 0.5313 0.0904 0.036 Uiso 1 1 calc R . .
C032 C 0.8334(5) 0.4142(3) 0.15495(19) 0.0346(15) Uani 1 1 d . . .
H03A H 0.8083 0.3565 0.1609 0.052 Uiso 1 1 calc R . .
H03B H 0.8404 0.4349 0.1840 0.052 Uiso 1 1 calc R . .
H03C H 0.9116 0.4132 0.1363 0.052 Uiso 1 1 calc R . .
C033 C 0.4170(4) 0.4262(3) 0.29976(16) 0.0143(11) Uani 1 1 d . . .
C034 C 0.5131(4) 0.3723(3) 0.41473(15) 0.0134(11) Uani 1 1 d . . .
C035 C 0.2432(5) 0.3778(3) 0.27238(17) 0.0239(13) Uani 1 1 d . . .
H03D H 0.2866 0.3577 0.2442 0.029 Uiso 1 1 calc R . .
H03E H 0.2046 0.4364 0.2650 0.029 Uiso 1 1 calc R . .
C036 C 0.5713(4) 0.2912(3) 0.41160(15) 0.0159(11) Uani 1 1 d . . .
C037 C 0.4578(4) 0.4665(3) 0.25665(16) 0.0188(12) Uani 1 1 d . . .
H037 H 0.4161 0.4636 0.2310 0.023 Uiso 1 1 calc R . .
C038 C 0.2365(4) 0.4173(3) 0.43197(15) 0.0151(11) Uani 1 1 d . . .
C040 C 0.5039(5) 1.0973(3) 0.16063(18) 0.0291(14) Uani 1 1 d . . .
H040 H 0.4550 1.1481 0.1667 0.035 Uiso 1 1 calc R . .
C041 C 0.6484(5) 0.9509(3) 0.14564(16) 0.0206(12) Uani 1 1 d . . .
C042 C 0.6146(5) 0.2555(4) 0.2547(2) 0.0424(16) Uani 1 1 d . . .
H04A H 0.6509 0.2812 0.2772 0.064 Uiso 1 1 calc R . .
H04B H 0.5297 0.2781 0.2545 0.064 Uiso 1 1 calc R . .
H04C H 0.6573 0.2691 0.2243 0.064 Uiso 1 1 calc R . .
C043 C 0.6221(4) 0.5153(3) 0.28797(16) 0.0197(12) Uani 1 1 d . . .
H043 H 0.6937 0.5430 0.2835 0.024 Uiso 1 1 calc R . .
C045 C 0.0051(5) 0.4404(4) 0.3389(2) 0.0444(17) Uani 1 1 d . . .
H04D H -0.0622 0.4854 0.3376 0.067 Uiso 1 1 calc R . .
H04E H 0.0811 0.4657 0.3299 0.067 Uiso 1 1 calc R . .
H04F H 0.0049 0.4110 0.3700 0.067 Uiso 1 1 calc R . .
C046 C 0.2937(5) 0.6969(4) 0.01269(19) 0.0370(15) Uani 1 1 d . . .
H04G H 0.2792 0.6565 -0.0077 0.055 Uiso 1 1 calc R . .
H04H H 0.2403 0.7496 0.0071 0.055 Uiso 1 1 calc R . .
H04I H 0.2775 0.6719 0.0445 0.055 Uiso 1 1 calc R . .
C047 C 0.8004(4) 0.7536(3) 0.19846(16) 0.0178(12) Uani 1 1 d . . .
C048 C 0.4129(5) 0.1523(4) 0.50195(18) 0.0331(14) Uani 1 1 d . . .
H04J H 0.4563 0.1282 0.5282 0.050 Uiso 1 1 calc R . .
H04K H 0.4015 0.2144 0.5005 0.050 Uiso 1 1 calc R . .
H04L H 0.4596 0.1363 0.4738 0.050 Uiso 1 1 calc R . .
C050 C -0.0083(5) 0.3759(3) 0.30563(19) 0.0316(14) Uani 1 1 d . . .
H050 H -0.0218 0.4083 0.2751 0.038 Uiso 1 1 calc R . .
C051 C 0.8072(4) 0.6119(3) 0.17256(16) 0.0183(12) Uani 1 1 d . . .
H05A H 0.7683 0.5752 0.1984 0.022 Uiso 1 1 calc R . .
H05B H 0.8950 0.6062 0.1746 0.022 Uiso 1 1 calc R . .
C052 C -0.0192(4) 0.1749(4) 0.43125(18) 0.0309(14) Uani 1 1 d . . .
H05C H -0.0899 0.1445 0.4311 0.046 Uiso 1 1 calc R . .
H05D H 0.0265 0.1783 0.4009 0.046 Uiso 1 1 calc R . .
H05E H -0.0453 0.2325 0.4390 0.046 Uiso 1 1 calc R . .
C053 C 0.7145(5) 0.4382(3) 0.08648(19) 0.0381(16) Uani 1 1 d . . .
H05F H 0.7882 0.4340 0.0653 0.057 Uiso 1 1 calc R . .
H05G H 0.6522 0.4768 0.0718 0.057 Uiso 1 1 calc R . .
H05H H 0.6865 0.3817 0.0949 0.057 Uiso 1 1 calc R . .
C055 C 0.5412(4) 0.4235(3) 0.44563(16) 0.0178(12) Uani 1 1 d . . .
H055 H 0.4984 0.4782 0.4474 0.021 Uiso 1 1 calc R . .
C057 C 0.5082(5) -0.0238(4) 0.2981(2) 0.0408(16) Uani 1 1 d . . .
H05I H 0.5213 -0.0859 0.3050 0.061 Uiso 1 1 calc R . .
H05J H 0.5517 -0.0060 0.2683 0.061 Uiso 1 1 calc R . .
H05K H 0.4220 -0.0063 0.2971 0.061 Uiso 1 1 calc R . .
C059 C -0.1172(5) 0.3241(4) 0.3223(2) 0.0448(17) Uani 1 1 d . . .
H05L H -0.1106 0.2978 0.3539 0.067 Uiso 1 1 calc R . .
H05M H -0.1175 0.2796 0.3026 0.067 Uiso 1 1 calc R . .
H05N H -0.1921 0.3622 0.3211 0.067 Uiso 1 1 calc R . .
C060 C 0.4148(5) 0.7143(3) 0.27745(16) 0.0240(13) Uani 1 1 d . . .
H060 H 0.4122 0.6516 0.2862 0.029 Uiso 1 1 calc R . .
C061 C 0.2319(5) 0.1882(3) 0.23999(18) 0.0327(14) Uani 1 1 d . . .
H06A H 0.2186 0.1416 0.2234 0.049 Uiso 1 1 calc R . .
H06B H 0.2747 0.1650 0.2665 0.049 Uiso 1 1 calc R . .
H06C H 0.2802 0.2282 0.2198 0.049 Uiso 1 1 calc R . .
C062 C 0.8128(4) 0.8718(3) 0.10215(17) 0.0204(12) Uani 1 1 d . . .
C063 C 0.7707(5) 0.8539(3) 0.06205(17) 0.0209(12) Uani 1 1 d . . .
C064 C 0.6926(4) 0.3152(3) 0.46984(17) 0.0230(13) Uani 1 1 d . . .
H064 H 0.7560 0.2957 0.4883 0.028 Uiso 1 1 calc R . .
C065 C 0.5586(4) 0.5104(3) 0.25133(17) 0.0199(12) Uani 1 1 d . . .
H065 H 0.5849 0.5377 0.2220 0.024 Uiso 1 1 calc R . .
C066 C 0.3206(4) 0.5452(3) 0.39410(16) 0.0142(11) Uani 1 1 d . . .
H066 H 0.3776 0.5711 0.3719 0.017 Uiso 1 1 calc R . .
C067 C 0.8133(5) 0.8974(3) 0.21326(18) 0.0269(13) Uani 1 1 d . . .
H067 H 0.7973 0.9571 0.2052 0.032 Uiso 1 1 calc R . .
C069 C 0.6639(4) 0.2634(3) 0.43972(16) 0.0197(12) Uani 1 1 d . . .
H069 H 0.7071 0.2088 0.4380 0.024 Uiso 1 1 calc R . .
C070 C 0.1739(5) 0.7420(4) 0.17273(19) 0.0363(15) Uani 1 1 d . . .
H07A H 0.2159 0.6989 0.1542 0.054 Uiso 1 1 calc R . .
H07B H 0.1927 0.7987 0.1584 0.054 Uiso 1 1 calc R . .
H07C H 0.0869 0.7390 0.1748 0.054 Uiso 1 1 calc R . .
C072 C 0.4777(4) 0.4368(3) 0.33669(15) 0.0130(11) Uani 1 1 d . . .
C073 C 0.0605(4) 0.1271(3) 0.46674(16) 0.0231(13) Uani 1 1 d . . .
H073 H 0.0769 0.0667 0.4600 0.028 Uiso 1 1 calc R . .
C074 C 0.8696(5) 0.8667(4) 0.25246(19) 0.0322(14) Uani 1 1 d . . .
H074 H 0.8907 0.9053 0.2712 0.039 Uiso 1 1 calc R . .
C075 C 0.5543(5) 0.0180(3) 0.33507(18) 0.0257(13) Uani 1 1 d . . .
H075 H 0.6422 -0.0007 0.3358 0.031 Uiso 1 1 calc R . .
C078 C 0.6235(5) 0.1593(4) 0.26740(18) 0.0315(14) Uani 1 1 d . . .
H078 H 0.5850 0.1354 0.2440 0.038 Uiso 1 1 calc R . .
C079 C 0.7807(4) 0.8423(3) 0.18619(17) 0.0192(12) Uani 1 1 d . . .
C081 C 0.9264(4) 0.8964(3) 0.10177(19) 0.0261(13) Uani 1 1 d . . .
H081 H 0.9539 0.9062 0.1294 0.031 Uiso 1 1 calc R . .
C082 C 0.8468(4) 0.8654(3) 0.02098(18) 0.0245(13) Uani 1 1 d . . .
H082 H 0.8204 0.8550 -0.0067 0.029 Uiso 1 1 calc R . .
C083 C 0.0477(6) 0.2791(4) 0.2160(2) 0.0456(17) Uani 1 1 d . . .
H08A H 0.0972 0.3218 0.1987 0.068 Uiso 1 1 calc R . .
H08B H -0.0306 0.3072 0.2270 0.068 Uiso 1 1 calc R . .
H08C H 0.0359 0.2372 0.1961 0.068 Uiso 1 1 calc R . .
C084 C 0.8940(5) 0.7815(4) 0.26379(18) 0.0301(14) Uani 1 1 d . . .
H084 H 0.9347 0.7608 0.2899 0.036 Uiso 1 1 calc R . .
C085 C 0.1531(4) 0.4685(3) 0.45797(16) 0.0191(12) Uani 1 1 d . . .
H085 H 0.0965 0.4428 0.4804 0.023 Uiso 1 1 calc R . .
C086 C 0.5302(4) 0.9438(3) 0.16533(16) 0.0175(12) Uani 1 1 d . . .
C087 C 0.3808(4) 0.8543(3) 0.20523(17) 0.0214(12) Uani 1 1 d . . .
H08D H 0.3102 0.8818 0.1900 0.026 Uiso 1 1 calc R . .
H08E H 0.3835 0.8800 0.2336 0.026 Uiso 1 1 calc R . .
C088 C 0.4587(5) 1.0191(3) 0.17419(17) 0.0269(13) Uani 1 1 d . . .
H088 H 0.3796 1.0168 0.1894 0.032 Uiso 1 1 calc R . .
C089 C 0.1215(5) -0.0297(4) 0.2877(2) 0.0352(15) Uani 1 1 d . . .
C090 C 0.3350(5) 0.9177(4) -0.01296(18) 0.0410(16) Uani 1 1 d . . .
H09A H 0.2773 0.9688 -0.0141 0.061 Uiso 1 1 calc R . .
H09B H 0.3080 0.8757 -0.0297 0.061 Uiso 1 1 calc R . .
H09C H 0.4143 0.9327 -0.0270 0.061 Uiso 1 1 calc R . .
C091 C 0.4081(5) 0.3830(4) 0.1406(2) 0.0360(15) Uani 1 1 d . . .
C092 C 0.1720(5) 0.2832(3) 0.47166(17) 0.0217(12) Uani 1 1 d . . .
H09D H 0.0846 0.3014 0.4726 0.026 Uiso 1 1 calc R . .
H09E H 0.2003 0.2913 0.5009 0.026 Uiso 1 1 calc R . .
C093 C 0.5452(5) 0.7328(3) 0.27808(17) 0.0280(13) Uani 1 1 d . . .
H09F H 0.5519 0.7934 0.2684 0.042 Uiso 1 1 calc R . .
H09G H 0.5984 0.6989 0.2572 0.042 Uiso 1 1 calc R . .
H09H H 0.5685 0.7177 0.3091 0.042 Uiso 1 1 calc R . .
C094 C 0.6173(5) 1.1024(3) 0.13869(19) 0.0320(14) Uani 1 1 d . . .
H094 H 0.6453 1.1564 0.1286 0.038 Uiso 1 1 calc R . .
C095 C 0.5116(5) 0.6352(3) 0.00627(18) 0.0327(14) Uani 1 1 d . . .
H09I H 0.4984 0.6031 0.0367 0.049 Uiso 1 1 calc R . .
H09J H 0.5947 0.6498 0.0008 0.049 Uiso 1 1 calc R . .
H09K H 0.4971 0.6003 -0.0169 0.049 Uiso 1 1 calc R . .
C096 C 0.2150(4) 0.7255(3) 0.22068(18) 0.0262(13) Uani 1 1 d . . .
H096 H 0.1685 0.7682 0.2395 0.031 Uiso 1 1 calc R . .
C100 C 0.2338(4) 0.5956(3) 0.41884(16) 0.0194(12) Uani 1 1 d . . .
H100 H 0.2306 0.6559 0.4135 0.023 Uiso 1 1 calc R . .
C103 C 0.9906(5) 0.6579(4) 0.0885(2) 0.0441(17) Uani 1 1 d . . .
H10A H 1.0664 0.6559 0.0684 0.066 Uiso 1 1 calc R . .
H10B H 1.0079 0.6527 0.1203 0.066 Uiso 1 1 calc R . .
H10C H 0.9424 0.7123 0.0809 0.066 Uiso 1 1 calc R . .
C104 C 0.1523(4) 0.5567(3) 0.45126(16) 0.0176(12) Uani 1 1 d . . .
H104 H 0.0951 0.5906 0.4692 0.021 Uiso 1 1 calc R . .
C106 C 0.4883(5) -0.0099(3) 0.38182(18) 0.0332(14) Uani 1 1 d . . .
H10D H 0.4020 0.0077 0.3815 0.050 Uiso 1 1 calc R . .
H10E H 0.5193 0.0166 0.4053 0.050 Uiso 1 1 calc R . .
H10F H 0.5014 -0.0720 0.3887 0.050 Uiso 1 1 calc R . .
C109 C 0.6303(4) 0.3953(3) 0.47356(16) 0.0213(12) Uani 1 1 d . . .
H109 H 0.6491 0.4297 0.4949 0.026 Uiso 1 1 calc R . .
C111 C 0.4162(5) 0.5643(3) 0.13243(16) 0.0202(12) Uani 1 1 d . . .
C112 C 0.6913(5) 1.0287(3) 0.13120(18) 0.0272(13) Uani 1 1 d . . .
H112 H 0.7706 1.0317 0.1163 0.033 Uiso 1 1 calc R . .
C113 C 0.2826(5) 0.4881(4) 0.0723(2) 0.0366(15) Uani 1 1 d . . .
C114 C 0.3659(5) 0.9462(3) 0.06655(19) 0.0373(15) Uani 1 1 d . . .
H11A H 0.4468 0.9639 0.0575 0.056 Uiso 1 1 calc R . .
H11B H 0.3593 0.9218 0.0988 0.056 Uiso 1 1 calc R . .
H11C H 0.3061 0.9958 0.0623 0.056 Uiso 1 1 calc R . .
C115 C 0.7407(5) 0.4728(3) 0.12957(17) 0.0249(13) Uani 1 1 d . . .
H115 H 0.6641 0.4728 0.1505 0.030 Uiso 1 1 calc R . .
C119 C 0.2899(5) 0.1176(3) 0.50713(17) 0.0254(13) Uani 1 1 d . . .
H119 H 0.2446 0.1314 0.5368 0.030 Uiso 1 1 calc R . .
C121 C 0.3015(5) 0.0211(3) 0.50632(18) 0.0335(15) Uani 1 1 d . . .
H12A H 0.3395 0.0075 0.4763 0.050 Uiso 1 1 calc R . .
H12B H 0.2214 0.0010 0.5120 0.050 Uiso 1 1 calc R . .
H12C H 0.3511 -0.0070 0.5301 0.050 Uiso 1 1 calc R . .
C122 C 0.3292(5) 0.7589(3) 0.31264(18) 0.0323(14) Uani 1 1 d . . .
H12D H 0.3570 0.7429 0.3429 0.048 Uiso 1 1 calc R . .
H12E H 0.2481 0.7418 0.3130 0.048 Uiso 1 1 calc R . .
H12F H 0.3273 0.8207 0.3046 0.048 Uiso 1 1 calc R . .
C123 C 0.9597(5) 0.8918(3) 0.0205(2) 0.0316(14) Uani 1 1 d . . .
H123 H 1.0096 0.8997 -0.0076 0.038 Uiso 1 1 calc R . .
C125 C 0.6023(4) 0.8230(3) 0.02412(16) 0.0223(12) Uani 1 1 d . . .
H12G H 0.6509 0.7834 0.0045 0.027 Uiso 1 1 calc R . .
H12H H 0.5932 0.8805 0.0066 0.027 Uiso 1 1 calc R . .
C129 C 0.1873(5) 0.4901(3) 0.16263(19) 0.0294(14) Uani 1 1 d . . .
C300 C 0.1807(5) 0.0717(3) 0.35111(17) 0.0236(13) Uani 1 1 d . . .
C301 C 0.6141(4) 0.1721(3) 0.36594(17) 0.0199(12) Uani 1 1 d . . .
H30A H 0.6297 0.1261 0.3911 0.024 Uiso 1 1 calc R . .
H30B H 0.6916 0.1923 0.3519 0.024 Uiso 1 1 calc R . .
C302 C 0.1102(5) 0.2348(3) 0.25610(18) 0.0281(13) Uani 1 1 d . . .
H302 H 0.0585 0.1905 0.2720 0.034 Uiso 1 1 calc R . .
C303 C 0.3237(4) 0.4582(3) 0.40170(15) 0.0118(11) Uani 1 1 d . . .
C304 C 0.5797(4) 0.4793(3) 0.33122(16) 0.0149(11) Uani 1 1 d . . .
H304 H 0.6204 0.4837 0.3569 0.018 Uiso 1 1 calc R . .
C305 C 0.8600(4) 0.7239(3) 0.23749(17) 0.0221(12) Uani 1 1 d . . .
H305 H 0.8772 0.6644 0.2460 0.026 Uiso 1 1 calc R . .
C350 C -0.0517(5) 0.0045(3) 0.36476(19) 0.0289(14) Uani 1 1 d . . .
C351 C 0.1654(5) -0.1046(4) 0.3792(2) 0.0379(16) Uani 1 1 d . . .
C352 C 0.7563(5) 0.1194(4) 0.2655(2) 0.0408(16) Uani 1 1 d . . .
H35G H 0.7971 0.1338 0.2348 0.061 Uiso 1 1 calc R . .
H35H H 0.7586 0.0573 0.2724 0.061 Uiso 1 1 calc R . .
H35I H 0.7971 0.1417 0.2879 0.061 Uiso 1 1 calc R . .
C353 C -0.0046(5) 0.1256(4) 0.51532(18) 0.0346(15) Uani 1 1 d . . .
H35D H -0.0207 0.1839 0.5233 0.052 Uiso 1 1 calc R . .
H35E H 0.0461 0.0912 0.5370 0.052 Uiso 1 1 calc R . .
H35F H -0.0809 0.1009 0.5167 0.052 Uiso 1 1 calc R . .
C354 C 0.1894(5) 0.6365(3) 0.2432(2) 0.0361(15) Uani 1 1 d . . .
H35A H 0.1060 0.6280 0.2404 0.054 Uiso 1 1 calc R . .
H35B H 0.2019 0.6308 0.2757 0.054 Uiso 1 1 calc R . .
H35C H 0.2441 0.5938 0.2282 0.054 Uiso 1 1 calc R . .
C355 C 0.4250(5) 0.7167(3) 0.00346(17) 0.0277(13) Uani 1 1 d . . .
H355 H 0.4379 0.7482 -0.0279 0.033 Uiso 1 1 calc R . .
C356 C 0.9026(7) 0.5936(7) 0.0317(2) 0.111(4) Uani 1 1 d . . .
H35J H 0.8586 0.6490 0.0227 0.167 Uiso 1 1 calc R . .
H35K H 0.8558 0.5480 0.0270 0.167 Uiso 1 1 calc R . .
H35L H 0.9807 0.5885 0.0131 0.167 Uiso 1 1 calc R . .
C600 C 0.2688(5) 0.2263(4) 0.60916(19) 0.0367(15) Uiso 1 1 d . . .
H600 H 0.3180 0.1744 0.6158 0.044 Uiso 1 1 calc R . .
C601 C 0.1430(6) 0.2269(4) 0.6146(2) 0.0464(17) Uiso 1 1 d . . .
H601 H 0.1085 0.1749 0.6240 0.056 Uiso 1 1 calc R . .
C602 C 0.0707(6) 0.2991(4) 0.6070(2) 0.0512(18) Uiso 1 1 d . . .
H602 H -0.0144 0.2996 0.6110 0.061 Uiso 1 1 calc R . .
C603 C 0.1265(6) 0.3743(4) 0.5926(2) 0.0505(18) Uiso 1 1 d . . .
H603 H 0.0768 0.4266 0.5879 0.061 Uiso 1 1 calc R . .
C604 C 0.2484(6) 0.3757(4) 0.5851(2) 0.0505(18) Uiso 1 1 d . . .
H604 H 0.2821 0.4274 0.5738 0.061 Uiso 1 1 calc R . .
C605 C 0.3222(6) 0.3010(4) 0.5940(2) 0.0439(16) Uiso 1 1 d . . .
C607 C 0.4525(6) 0.3026(5) 0.5853(2) 0.068(2) Uiso 1 1 d . . .
H60A H 0.4755 0.3140 0.5524 0.102 Uiso 1 1 calc R . .
H60B H 0.4926 0.2474 0.5971 0.102 Uiso 1 1 calc R . .
H60C H 0.4770 0.3475 0.6007 0.102 Uiso 1 1 calc R . .
N1 N 0.2395(3) 0.3299(2) 0.43264(12) 0.0139(9) Uani 1 1 d . . .
N2 N 0.5319(3) 0.2418(2) 0.38247(12) 0.0131(9) Uani 1 1 d U . .
N3 N 0.3245(3) 0.3738(2) 0.30802(12) 0.0156(9) Uani 1 1 d . . .
N4 N 0.4229(3) 0.4009(2) 0.38205(12) 0.0120(9) Uani 1 1 d . . .
N5 N 0.7550(3) 0.7015(2) 0.17176(13) 0.0172(10) Uani 1 1 d . . .
N6 N 0.7260(3) 0.8695(2) 0.14337(13) 0.0171(9) Uani 1 1 d . . .
N7 N 0.4920(3) 0.8627(3) 0.17480(13) 0.0193(10) Uani 1 1 d . . .
N8 N 0.6575(3) 0.8247(3) 0.06645(13) 0.0186(10) Uani 1 1 d . . .
O1 O 0.2375(3) 0.1292(2) 0.35408(12) 0.0251(9) Uani 1 1 d . . .
O2 O 0.1368(4) -0.0383(3) 0.24902(16) 0.0526(13) Uani 1 1 d . . .
O3 O -0.1513(4) 0.0156(3) 0.37837(14) 0.0423(11) Uani 1 1 d . . .
O4 O 0.4638(4) 0.3186(3) 0.14876(16) 0.0592(13) Uani 1 1 d . . .
O5 O 0.0945(3) 0.4954(2) 0.18484(13) 0.0374(10) Uani 1 1 d . . .
O6 O 0.2504(4) 0.4935(3) 0.03610(15) 0.0513(12) Uani 1 1 d . . .
O7 O 0.4772(3) 0.6151(2) 0.13444(11) 0.0188(8) Uani 1 1 d . . .
O8 O 0.2073(4) -0.1628(3) 0.40144(14) 0.0580(14) Uani 1 1 d . . .
P005 P 0.77329(12) 0.58573(8) 0.11728(4) 0.0185(3) Uani 1 1 d . . .
P006 P 0.45417(12) 0.78535(9) 0.04516(4) 0.0198(3) Uani 1 1 d . . .
P007 P 0.53389(12) 0.13487(8) 0.32294(4) 0.0189(3) Uani 1 1 d . . .
P008 P 0.20648(12) 0.17165(8) 0.45968(4) 0.0177(3) Uani 1 1 d . . .
P009 P 0.13123(12) 0.30509(9) 0.29929(5) 0.0228(3) Uani 1 1 d . . .
P010 P 0.37515(12) 0.73918(8) 0.21766(5) 0.0205(3) Uani 1 1 d . . .
Co1 Co 0.10354(6) -0.01228(4) 0.34581(2) 0.02524(18) Uani 1 1 d . . .
Co2 Co 0.32714(7) 0.48344(4) 0.12793(2) 0.02554(18) Uani 1 1 d . . .
Th1 Th 0.328344(15) 0.263711(11) 0.368775(6) 0.01204(5) Uani 1 1 d . . .
Th2 Th 0.585456(16) 0.749903(11) 0.135442(6) 0.01392(5) Uani 1 1 d . . .
 
loop_
 _atom_site_aniso_label
 _atom_site_aniso_U_11
 _atom_site_aniso_U_22
 _atom_site_aniso_U_33
 _atom_site_aniso_U_23
 _atom_site_aniso_U_13
 _atom_site_aniso_U_12
C029 0.026(3) 0.025(3) 0.026(3) 0.000(3) -0.005(2) 0.003(2)
C030 0.017(3) 0.028(3) 0.053(4) 0.005(3) 0.002(3) -0.009(3)
C031 0.028(3) 0.035(4) 0.026(3) -0.008(3) 0.007(2) 0.001(3)
C032 0.042(4) 0.024(3) 0.039(4) 0.000(3) -0.012(3) 0.000(3)
C033 0.011(3) 0.016(3) 0.017(3) -0.001(2) -0.004(2) 0.000(2)
C034 0.009(3) 0.021(3) 0.009(3) -0.002(2) 0.003(2) -0.001(2)
C035 0.029(3) 0.023(3) 0.022(3) 0.004(2) -0.011(2) -0.010(2)
C036 0.012(3) 0.022(3) 0.012(3) -0.001(2) 0.003(2) -0.002(2)
C037 0.020(3) 0.016(3) 0.020(3) -0.001(2) -0.006(2) 0.001(2)
C038 0.014(3) 0.017(3) 0.013(3) 0.001(2) -0.005(2) 0.002(2)
C040 0.038(4) 0.014(3) 0.035(4) -0.009(3) -0.006(3) 0.007(3)
C041 0.026(3) 0.016(3) 0.020(3) -0.002(2) -0.005(2) -0.001(2)
C042 0.042(4) 0.038(4) 0.038(4) 0.008(3) 0.014(3) 0.000(3)
C043 0.014(3) 0.021(3) 0.024(3) -0.004(2) 0.003(2) -0.007(2)
C045 0.034(4) 0.043(4) 0.058(4) -0.022(4) -0.008(3) 0.009(3)
C046 0.032(4) 0.046(4) 0.039(4) -0.019(3) -0.008(3) -0.008(3)
C047 0.012(3) 0.024(3) 0.019(3) -0.008(2) -0.002(2) -0.002(2)
C048 0.034(4) 0.040(4) 0.026(3) -0.001(3) -0.009(3) -0.004(3)
C050 0.029(3) 0.027(3) 0.037(4) 0.001(3) -0.011(3) 0.010(3)
C051 0.012(3) 0.020(3) 0.021(3) 0.002(2) 0.002(2) -0.002(2)
C052 0.015(3) 0.042(4) 0.037(4) -0.012(3) -0.001(2) 0.003(3)
C053 0.053(4) 0.022(3) 0.045(4) -0.008(3) -0.022(3) -0.004(3)
C055 0.011(3) 0.025(3) 0.017(3) -0.007(2) 0.000(2) 0.001(2)
C057 0.050(4) 0.029(4) 0.048(4) -0.016(3) -0.007(3) -0.005(3)
C059 0.018(3) 0.056(4) 0.059(4) -0.003(4) -0.006(3) 0.001(3)
C060 0.032(3) 0.017(3) 0.019(3) 0.000(2) 0.004(2) 0.002(2)
C061 0.041(4) 0.027(3) 0.032(3) -0.009(3) -0.004(3) -0.007(3)
C062 0.018(3) 0.013(3) 0.028(3) 0.001(2) 0.000(2) 0.000(2)
C063 0.028(3) 0.012(3) 0.022(3) 0.001(2) -0.002(2) -0.001(2)
C064 0.014(3) 0.033(3) 0.022(3) -0.004(3) -0.006(2) 0.004(2)
C065 0.018(3) 0.022(3) 0.018(3) 0.002(2) 0.005(2) -0.003(2)
C066 0.007(3) 0.018(3) 0.017(3) -0.002(2) 0.002(2) -0.004(2)
C067 0.028(3) 0.022(3) 0.034(3) -0.011(3) -0.008(3) -0.003(3)
C069 0.017(3) 0.025(3) 0.020(3) -0.008(3) -0.010(2) 0.002(2)
C070 0.022(3) 0.040(4) 0.049(4) -0.013(3) -0.004(3) -0.003(3)
C072 0.014(3) 0.011(3) 0.013(3) -0.001(2) 0.005(2) -0.001(2)
C073 0.023(3) 0.020(3) 0.025(3) -0.002(3) 0.004(2) -0.007(2)
C074 0.029(3) 0.039(4) 0.033(4) -0.015(3) -0.012(3) -0.002(3)
C075 0.023(3) 0.020(3) 0.036(3) -0.012(3) -0.009(3) 0.005(2)
C078 0.032(3) 0.032(3) 0.029(3) -0.006(3) -0.003(3) 0.003(3)
C079 0.011(3) 0.021(3) 0.027(3) -0.006(3) -0.006(2) 0.002(2)
C081 0.018(3) 0.023(3) 0.036(3) -0.001(3) -0.004(3) -0.003(2)
C082 0.022(3) 0.024(3) 0.024(3) 0.002(3) 0.004(2) 0.001(2)
C083 0.055(4) 0.038(4) 0.049(4) -0.010(3) -0.027(3) 0.001(3)
C084 0.023(3) 0.046(4) 0.024(3) -0.003(3) -0.013(2) 0.000(3)
C085 0.021(3) 0.019(3) 0.017(3) -0.001(2) 0.002(2) -0.006(2)
C086 0.023(3) 0.018(3) 0.013(3) -0.002(2) -0.006(2) -0.002(2)
C087 0.021(3) 0.023(3) 0.018(3) -0.001(2) -0.002(2) 0.003(2)
C088 0.033(3) 0.020(3) 0.027(3) -0.007(3) 0.002(3) 0.002(3)
C089 0.026(3) 0.027(3) 0.054(4) -0.011(3) 0.000(3) -0.005(3)
C090 0.046(4) 0.036(4) 0.036(4) 0.009(3) -0.012(3) 0.009(3)
C091 0.040(4) 0.026(4) 0.043(4) 0.000(3) -0.010(3) -0.005(3)
C092 0.026(3) 0.018(3) 0.020(3) -0.002(2) 0.006(2) -0.005(2)
C093 0.032(3) 0.026(3) 0.025(3) -0.002(3) -0.003(3) -0.001(3)
C094 0.041(4) 0.015(3) 0.041(4) -0.004(3) -0.008(3) -0.003(3)
C095 0.041(4) 0.034(4) 0.026(3) -0.014(3) -0.003(3) -0.006(3)
C096 0.022(3) 0.027(3) 0.028(3) -0.004(3) 0.005(2) -0.005(3)
C100 0.021(3) 0.016(3) 0.022(3) -0.001(2) -0.005(2) -0.004(2)
C103 0.032(4) 0.045(4) 0.054(4) -0.008(3) 0.012(3) -0.016(3)
C104 0.013(3) 0.019(3) 0.021(3) -0.008(2) 0.003(2) 0.000(2)
C106 0.039(4) 0.018(3) 0.044(4) 0.001(3) -0.015(3) -0.001(3)
C109 0.017(3) 0.034(3) 0.016(3) -0.012(3) -0.008(2) -0.001(2)
C111 0.028(3) 0.021(3) 0.008(3) 0.002(2) -0.002(2) 0.009(3)
C112 0.029(3) 0.022(3) 0.029(3) -0.004(3) 0.001(3) -0.004(3)
C113 0.043(4) 0.033(4) 0.038(4) -0.008(3) -0.008(3) -0.011(3)
C114 0.044(4) 0.025(3) 0.039(4) 0.002(3) -0.002(3) 0.006(3)
C115 0.028(3) 0.022(3) 0.027(3) -0.007(3) -0.006(2) -0.004(2)
C119 0.034(3) 0.025(3) 0.016(3) 0.003(2) -0.006(2) -0.002(3)
C121 0.045(4) 0.025(3) 0.027(3) 0.010(3) -0.011(3) 0.003(3)
C122 0.040(4) 0.026(3) 0.028(3) -0.001(3) 0.004(3) -0.003(3)
C123 0.024(3) 0.027(3) 0.038(4) 0.006(3) 0.008(3) -0.001(3)
C125 0.026(3) 0.028(3) 0.013(3) -0.003(2) -0.004(2) -0.002(2)
C129 0.030(4) 0.024(3) 0.036(4) 0.004(3) -0.013(3) -0.009(3)
C300 0.022(3) 0.024(3) 0.024(3) -0.008(3) -0.001(2) 0.006(3)
C301 0.018(3) 0.016(3) 0.024(3) -0.001(2) -0.003(2) 0.002(2)
C302 0.029(3) 0.026(3) 0.032(3) -0.003(3) -0.012(3) -0.003(3)
C303 0.008(3) 0.015(3) 0.012(3) -0.001(2) -0.001(2) 0.003(2)
C304 0.011(3) 0.015(3) 0.018(3) 0.002(2) -0.005(2) 0.000(2)
C305 0.018(3) 0.022(3) 0.025(3) -0.003(3) -0.003(2) 0.003(2)
C350 0.036(4) 0.018(3) 0.034(4) -0.013(3) 0.004(3) -0.005(3)
C351 0.042(4) 0.029(4) 0.035(4) -0.004(3) 0.018(3) 0.003(3)
C352 0.037(4) 0.038(4) 0.043(4) -0.014(3) 0.012(3) 0.006(3)
C353 0.035(4) 0.035(4) 0.032(3) -0.001(3) 0.010(3) -0.014(3)
C354 0.022(3) 0.027(3) 0.057(4) 0.001(3) 0.002(3) -0.009(3)
C355 0.035(3) 0.033(3) 0.016(3) -0.008(3) -0.002(2) -0.005(3)
C356 0.085(6) 0.230(12) 0.038(5) -0.044(6) 0.027(4) -0.095(7)
N1 0.014(2) 0.013(2) 0.014(2) -0.0010(18) 0.0023(17) -0.0036(18)
N2 0.0135(17) 0.0187(18) 0.0104(17) -0.0057(15) -0.0096(14) -0.0016(14)
N3 0.015(2) 0.018(2) 0.015(2) 0.0014(19) -0.0058(18) -0.0044(18)
N4 0.011(2) 0.013(2) 0.011(2) -0.0023(18) -0.0007(16) 0.0024(17)
N5 0.017(2) 0.015(2) 0.019(2) -0.0009(19) -0.0019(18) 0.0014(18)
N6 0.015(2) 0.016(2) 0.019(2) -0.0020(19) -0.0004(18) 0.0002(18)
N7 0.013(2) 0.021(2) 0.023(2) -0.005(2) 0.0032(18) 0.0000(19)
N8 0.018(2) 0.020(2) 0.017(2) 0.0000(19) 0.0019(18) -0.0077(19)
O1 0.022(2) 0.024(2) 0.032(2) -0.0110(18) -0.0027(17) -0.0082(17)
O2 0.044(3) 0.073(4) 0.046(3) -0.031(3) 0.005(2) -0.010(2)
O3 0.028(3) 0.041(3) 0.055(3) -0.005(2) 0.002(2) 0.001(2)
O4 0.064(3) 0.023(3) 0.090(4) 0.002(3) -0.026(3) 0.005(2)
O5 0.028(2) 0.042(3) 0.042(3) 0.006(2) -0.007(2) -0.011(2)
O6 0.071(3) 0.050(3) 0.038(3) -0.013(2) -0.023(2) -0.005(2)
O7 0.0152(19) 0.025(2) 0.019(2) -0.0053(17) -0.0031(15) -0.0078(17)
O8 0.076(4) 0.039(3) 0.042(3) 0.006(2) 0.020(2) 0.024(3)
P005 0.0185(7) 0.0177(7) 0.0192(7) -0.0024(6) -0.0037(6) 0.0004(6)
P006 0.0204(8) 0.0217(8) 0.0170(7) 0.0005(6) -0.0048(6) -0.0020(6)
P007 0.0208(8) 0.0180(7) 0.0187(8) -0.0051(6) -0.0048(6) 0.0012(6)
P008 0.0216(8) 0.0139(7) 0.0166(7) 0.0010(6) 0.0006(6) -0.0031(6)
P009 0.0209(8) 0.0232(8) 0.0248(8) 0.0000(7) -0.0076(6) -0.0021(6)
P010 0.0212(8) 0.0177(7) 0.0219(8) -0.0056(6) 0.0040(6) -0.0026(6)
Co1 0.0226(4) 0.0197(4) 0.0339(5) -0.0073(4) 0.0025(3) -0.0051(3)
Co2 0.0306(4) 0.0197(4) 0.0280(4) -0.0012(3) -0.0091(3) -0.0058(3)
Th1 0.01146(10) 0.01231(10) 0.01244(10) -0.00054(8) -0.00252(7) -0.00152(8)
Th2 0.01326(10) 0.01431(11) 0.01390(11) -0.00193(8) -0.00187(8) 0.00049(8)
 
_geom_special_details
;
 All esds (except the esd in the dihedral angle between two l.s. planes)
 are estimated using the full covariance matrix.  The cell esds are taken
 into account individually in the estimation of esds in distances, angles
 and torsion angles; correlations between esds in cell parameters are only
 used when they are defined by crystal symmetry.  An approximate (isotropic)
 treatment of cell esds is used for estimating esds involving l.s. planes.
;
 
loop_
 _geom_bond_atom_site_label_1
 _geom_bond_atom_site_label_2
 _geom_bond_distance
 _geom_bond_site_symmetry_2
 _geom_bond_publ_flag
C029 C114 1.524(7) . ?
C029 C090 1.536(7) . ?
C029 P006 1.844(5) . ?
C029 H029 1.0000 . ?
C030 C123 1.390(8) . ?
C030 C081 1.398(7) . ?
C030 H030 0.9500 . ?
C031 C103 1.493(7) . ?
C031 C356 1.526(8) . ?
C031 P005 1.867(5) . ?
C031 H031 1.0000 . ?
C032 C115 1.516(7) . ?
C032 H03A 0.9800 . ?
C032 H03B 0.9800 . ?
C032 H03C 0.9800 . ?
C033 N3 1.389(6) . ?
C033 C072 1.398(6) . ?
C033 C037 1.402(6) . ?
C034 C036 1.388(6) . ?
C034 C055 1.393(6) . ?
C034 N4 1.479(6) . ?
C035 N3 1.471(6) . ?
C035 P009 1.848(5) . ?
C035 H03D 0.9900 . ?
C035 H03E 0.9900 . ?
C036 N2 1.388(6) . ?
C036 C069 1.407(6) . ?
C037 C065 1.384(6) . ?
C037 H037 0.9500 . ?
C038 N1 1.387(6) . ?
C038 C085 1.399(6) . ?
C038 C303 1.405(6) . ?
C040 C094 1.366(7) . ?
C040 C088 1.393(7) . ?
C040 H040 0.9500 . ?
C041 C112 1.379(7) . ?
C041 C086 1.397(7) . ?
C041 N6 1.480(6) . ?
C042 C078 1.522(7) . ?
C042 H04A 0.9800 . ?
C042 H04B 0.9800 . ?
C042 H04C 0.9800 . ?
C043 C065 1.387(7) . ?
C043 C304 1.387(6) . ?
C043 H043 0.9500 . ?
C045 C050 1.550(7) . ?
C045 H04D 0.9800 . ?
C045 H04E 0.9800 . ?
C045 H04F 0.9800 . ?
C046 C355 1.532(7) . ?
C046 H04G 0.9800 . ?
C046 H04H 0.9800 . ?
C046 H04I 0.9800 . ?
C047 N5 1.398(6) . ?
C047 C305 1.408(7) . ?
C047 C079 1.409(7) . ?
C048 C119 1.533(7) . ?
C048 H04J 0.9800 . ?
C048 H04K 0.9800 . ?
C048 H04L 0.9800 . ?
C050 C059 1.552(7) . ?
C050 P009 1.828(5) . ?
C050 H050 1.0000 . ?
C051 N5 1.477(6) . ?
C051 P005 1.841(5) . ?
C051 H05A 0.9900 . ?
C051 H05B 0.9900 . ?
C052 C073 1.532(7) . ?
C052 H05C 0.9800 . ?
C052 H05D 0.9800 . ?
C052 H05E 0.9800 . ?
C053 C115 1.533(7) . ?
C053 H05F 0.9800 . ?
C053 H05G 0.9800 . ?
C053 H05H 0.9800 . ?
C055 C109 1.375(6) . ?
C055 H055 0.9500 . ?
C057 C075 1.529(7) . ?
C057 H05I 0.9800 . ?
C057 H05J 0.9800 . ?
C057 H05K 0.9800 . ?
C059 H05L 0.9800 . ?
C059 H05M 0.9800 . ?
C059 H05N 0.9800 . ?
C060 C122 1.524(6) . ?
C060 C093 1.532(7) . ?
C060 P010 1.862(5) . ?
C060 H060 1.0000 . ?
C061 C302 1.535(7) . ?
C061 H06A 0.9800 . ?
C061 H06B 0.9800 . ?
C061 H06C 0.9800 . ?
C062 C081 1.378(7) . ?
C062 C063 1.410(7) . ?
C062 N6 1.470(6) . ?
C063 N8 1.392(6) . ?
C063 C082 1.407(7) . ?
C064 C069 1.385(7) . ?
C064 C109 1.392(7) . ?
C064 H064 0.9500 . ?
C065 H065 0.9500 . ?
C066 C303 1.371(6) . ?
C066 C100 1.393(6) . ?
C066 H066 0.9500 . ?
C067 C079 1.375(7) . ?
C067 C074 1.395(7) . ?
C067 H067 0.9500 . ?
C069 H069 0.9500 . ?
C070 C096 1.530(7) . ?
C070 H07A 0.9800 . ?
C070 H07B 0.9800 . ?
C070 H07C 0.9800 . ?
C072 C304 1.382(6) . ?
C072 N4 1.482(6) . ?
C073 C353 1.536(7) . ?
C073 P008 1.843(5) . ?
C073 H073 1.0000 . ?
C074 C084 1.358(7) . ?
C074 H074 0.9500 . ?
C075 C106 1.529(7) . ?
C075 P007 1.841(5) . ?
C075 H075 1.0000 . ?
C078 C352 1.551(7) . ?
C078 P007 1.846(5) . ?
C078 H078 1.0000 . ?
C079 N6 1.470(6) . ?
C081 H081 0.9500 . ?
C082 C123 1.381(7) . ?
C082 H082 0.9500 . ?
C083 C302 1.507(7) . ?
C083 H08A 0.9800 . ?
C083 H08B 0.9800 . ?
C083 H08C 0.9800 . ?
C084 C305 1.395(7) . ?
C084 H084 0.9500 . ?
C085 C104 1.392(6) . ?
C085 H085 0.9500 . ?
C086 N7 1.391(6) . ?
C086 C088 1.401(7) . ?
C087 N7 1.460(6) . ?
C087 P010 1.828(5) . ?
C087 H08D 0.9900 . ?
C087 H08E 0.9900 . ?
C088 H088 0.9500 . ?
C089 O2 1.166(6) . ?
C089 Co1 1.768(7) . ?
C090 H09A 0.9800 . ?
C090 H09B 0.9800 . ?
C090 H09C 0.9800 . ?
C091 O4 1.150(6) . ?
C091 Co2 1.763(6) . ?
C092 N1 1.469(6) . ?
C092 P008 1.848(5) . ?
C092 H09D 0.9900 . ?
C092 H09E 0.9900 . ?
C093 H09F 0.9800 . ?
C093 H09G 0.9800 . ?
C093 H09H 0.9800 . ?
C094 C112 1.385(7) . ?
C094 H094 0.9500 . ?
C095 C355 1.528(7) . ?
C095 H09I 0.9800 . ?
C095 H09J 0.9800 . ?
C095 H09K 0.9800 . ?
C096 C354 1.528(7) . ?
C096 P010 1.830(5) . ?
C096 H096 1.0000 . ?
C100 C104 1.382(6) . ?
C100 H100 0.9500 . ?
C103 H10A 0.9800 . ?
C103 H10B 0.9800 . ?
C103 H10C 0.9800 . ?
C104 H104 0.9500 . ?
C106 H10D 0.9800 . ?
C106 H10E 0.9800 . ?
C106 H10F 0.9800 . ?
C109 H109 0.9500 . ?
C111 O7 1.133(6) . ?
C111 Co2 1.752(6) . ?
C112 H112 0.9500 . ?
C113 O6 1.165(6) . ?
C113 Co2 1.773(6) . ?
C114 H11A 0.9800 . ?
C114 H11B 0.9800 . ?
C114 H11C 0.9800 . ?
C115 P005 1.857(5) . ?
C115 H115 1.0000 . ?
C119 C121 1.532(7) . ?
C119 P008 1.846(5) . ?
C119 H119 1.0000 . ?
C121 H12A 0.9800 . ?
C121 H12B 0.9800 . ?
C121 H12C 0.9800 . ?
C122 H12D 0.9800 . ?
C122 H12E 0.9800 . ?
C122 H12F 0.9800 . ?
C123 H123 0.9500 . ?
C125 N8 1.472(6) . ?
C125 P006 1.847(5) . ?
C125 H12G 0.9900 . ?
C125 H12H 0.9900 . ?
C129 O5 1.166(6) . ?
C129 Co2 1.774(6) . ?
C300 O1 1.196(6) . ?
C300 Co1 1.713(6) . ?
C301 N2 1.458(6) . ?
C301 P007 1.846(5) . ?
C301 H30A 0.9900 . ?
C301 H30B 0.9900 . ?
C302 P009 1.866(5) . ?
C302 H302 1.0000 . ?
C303 N4 1.472(5) . ?
C304 H304 0.9500 . ?
C305 H305 0.9500 . ?
C350 O3 1.146(6) . ?
C350 Co1 1.770(6) . ?
C351 O8 1.151(6) . ?
C351 Co1 1.778(6) . ?
C352 H35G 0.9800 . ?
C352 H35H 0.9800 . ?
C352 H35I 0.9800 . ?
C353 H35D 0.9800 . ?
C353 H35E 0.9800 . ?
C353 H35F 0.9800 . ?
C354 H35A 0.9800 . ?
C354 H35B 0.9800 . ?
C354 H35C 0.9800 . ?
C355 P006 1.841(5) . ?
C355 H355 1.0000 . ?
C356 H35J 0.9800 . ?
C356 H35K 0.9800 . ?
C356 H35L 0.9800 . ?
C600 C605 1.393(8) . ?
C600 C601 1.404(8) . ?
C600 H600 0.9500 . ?
C601 C602 1.337(8) . ?
C601 H601 0.9500 . ?
C602 C603 1.410(8) . ?
C602 H602 0.9500 . ?
C603 C604 1.365(8) . ?
C603 H603 0.9500 . ?
C604 C605 1.382(8) . ?
C604 H604 0.9500 . ?
C605 C607 1.460(8) . ?
C607 H60A 0.9800 . ?
C607 H60B 0.9800 . ?
C607 H60C 0.9800 . ?
N1 Th1 2.355(4) . ?
N2 Th1 2.351(4) . ?
N3 Th1 2.341(4) . ?
N4 Th1 2.636(4) . ?
N5 Th2 2.307(4) . ?
N6 Th2 2.667(4) . ?
N7 Th2 2.352(4) . ?
N8 Th2 2.332(4) . ?
O1 Th1 2.590(3) . ?
O7 Th2 2.596(3) . ?
P005 Th2 3.2254(13) . ?
P006 Th2 3.1687(13) . ?
P007 Th1 3.2083(13) . ?
P008 Th1 3.1346(13) . ?
P009 Th1 3.1629(14) . ?
P010 Th2 3.1899(13) . ?
 
loop_
 _geom_angle_atom_site_label_1
 _geom_angle_atom_site_label_2
 _geom_angle_atom_site_label_3
 _geom_angle
 _geom_angle_site_symmetry_1
 _geom_angle_site_symmetry_3
 _geom_angle_publ_flag
C114 C029 C090 112.0(5) . . ?
C114 C029 P006 110.1(4) . . ?
C090 C029 P006 114.7(4) . . ?
C114 C029 H029 106.5 . . ?
C090 C029 H029 106.5 . . ?
P006 C029 H029 106.5 . . ?
C123 C030 C081 119.3(5) . . ?
C123 C030 H030 120.3 . . ?
C081 C030 H030 120.3 . . ?
C103 C031 C356 108.2(5) . . ?
C103 C031 P005 113.4(4) . . ?
C356 C031 P005 108.8(4) . . ?
C103 C031 H031 108.7 . . ?
C356 C031 H031 108.7 . . ?
P005 C031 H031 108.7 . . ?
C115 C032 H03A 109.5 . . ?
C115 C032 H03B 109.5 . . ?
H03A C032 H03B 109.5 . . ?
C115 C032 H03C 109.5 . . ?
H03A C032 H03C 109.5 . . ?
H03B C032 H03C 109.5 . . ?
N3 C033 C072 117.8(4) . . ?
N3 C033 C037 124.7(4) . . ?
C072 C033 C037 117.4(4) . . ?
C036 C034 C055 121.8(4) . . ?
C036 C034 N4 115.2(4) . . ?
C055 C034 N4 123.0(4) . . ?
N3 C035 P009 102.7(3) . . ?
N3 C035 H03D 111.2 . . ?
P009 C035 H03D 111.2 . . ?
N3 C035 H03E 111.2 . . ?
P009 C035 H03E 111.2 . . ?
H03D C035 H03E 109.1 . . ?
N2 C036 C034 118.2(4) . . ?
N2 C036 C069 124.4(4) . . ?
C034 C036 C069 117.4(4) . . ?
C065 C037 C033 120.2(5) . . ?
C065 C037 H037 119.9 . . ?
C033 C037 H037 119.9 . . ?
N1 C038 C085 125.9(4) . . ?
N1 C038 C303 116.8(4) . . ?
C085 C038 C303 117.3(4) . . ?
C094 C040 C088 121.3(5) . . ?
C094 C040 H040 119.4 . . ?
C088 C040 H040 119.4 . . ?
C112 C041 C086 122.2(5) . . ?
C112 C041 N6 122.2(5) . . ?
C086 C041 N6 115.5(4) . . ?
C078 C042 H04A 109.5 . . ?
C078 C042 H04B 109.5 . . ?
H04A C042 H04B 109.5 . . ?
C078 C042 H04C 109.5 . . ?
H04A C042 H04C 109.5 . . ?
H04B C042 H04C 109.5 . . ?
C065 C043 C304 119.1(5) . . ?
C065 C043 H043 120.5 . . ?
C304 C043 H043 120.5 . . ?
C050 C045 H04D 109.5 . . ?
C050 C045 H04E 109.5 . . ?
H04D C045 H04E 109.5 . . ?
C050 C045 H04F 109.5 . . ?
H04D C045 H04F 109.5 . . ?
H04E C045 H04F 109.5 . . ?
C355 C046 H04G 109.5 . . ?
C355 C046 H04H 109.5 . . ?
H04G C046 H04H 109.5 . . ?
C355 C046 H04I 109.5 . . ?
H04G C046 H04I 109.5 . . ?
H04H C046 H04I 109.5 . . ?
N5 C047 C305 124.8(5) . . ?
N5 C047 C079 117.2(4) . . ?
C305 C047 C079 117.9(5) . . ?
C119 C048 H04J 109.5 . . ?
C119 C048 H04K 109.5 . . ?
H04J C048 H04K 109.5 . . ?
C119 C048 H04L 109.5 . . ?
H04J C048 H04L 109.5 . . ?
H04K C048 H04L 109.5 . . ?
C045 C050 C059 111.6(5) . . ?
C045 C050 P009 109.2(4) . . ?
C059 C050 P009 110.8(4) . . ?
C045 C050 H050 108.4 . . ?
C059 C050 H050 108.4 . . ?
P009 C050 H050 108.4 . . ?
N5 C051 P005 102.0(3) . . ?
N5 C051 H05A 111.4 . . ?
P005 C051 H05A 111.4 . . ?
N5 C051 H05B 111.4 . . ?
P005 C051 H05B 111.4 . . ?
H05A C051 H05B 109.2 . . ?
C073 C052 H05C 109.5 . . ?
C073 C052 H05D 109.5 . . ?
H05C C052 H05D 109.5 . . ?
C073 C052 H05E 109.5 . . ?
H05C C052 H05E 109.5 . . ?
H05D C052 H05E 109.5 . . ?
C115 C053 H05F 109.5 . . ?
C115 C053 H05G 109.5 . . ?
H05F C053 H05G 109.5 . . ?
C115 C053 H05H 109.5 . . ?
H05F C053 H05H 109.5 . . ?
H05G C053 H05H 109.5 . . ?
C109 C055 C034 120.5(5) . . ?
C109 C055 H055 119.8 . . ?
C034 C055 H055 119.8 . . ?
C075 C057 H05I 109.5 . . ?
C075 C057 H05J 109.5 . . ?
H05I C057 H05J 109.5 . . ?
C075 C057 H05K 109.5 . . ?
H05I C057 H05K 109.5 . . ?
H05J C057 H05K 109.5 . . ?
C050 C059 H05L 109.5 . . ?
C050 C059 H05M 109.5 . . ?
H05L C059 H05M 109.5 . . ?
C050 C059 H05N 109.5 . . ?
H05L C059 H05N 109.5 . . ?
H05M C059 H05N 109.5 . . ?
C122 C060 C093 111.8(4) . . ?
C122 C060 P010 114.8(4) . . ?
C093 C060 P010 108.5(3) . . ?
C122 C060 H060 107.1 . . ?
C093 C060 H060 107.1 . . ?
P010 C060 H060 107.1 . . ?
C302 C061 H06A 109.5 . . ?
C302 C061 H06B 109.5 . . ?
H06A C061 H06B 109.5 . . ?
C302 C061 H06C 109.5 . . ?
H06A C061 H06C 109.5 . . ?
H06B C061 H06C 109.5 . . ?
C081 C062 C063 121.5(5) . . ?
C081 C062 N6 121.9(5) . . ?
C063 C062 N6 116.4(4) . . ?
N8 C063 C082 125.2(5) . . ?
N8 C063 C062 117.2(4) . . ?
C082 C063 C062 117.6(5) . . ?
C069 C064 C109 121.3(5) . . ?
C069 C064 H064 119.3 . . ?
C109 C064 H064 119.3 . . ?
C037 C065 C043 121.4(5) . . ?
C037 C065 H065 119.3 . . ?
C043 C065 H065 119.3 . . ?
C303 C066 C100 120.1(4) . . ?
C303 C066 H066 120.0 . . ?
C100 C066 H066 120.0 . . ?
C079 C067 C074 120.8(5) . . ?
C079 C067 H067 119.6 . . ?
C074 C067 H067 119.6 . . ?
C064 C069 C036 120.4(5) . . ?
C064 C069 H069 119.8 . . ?
C036 C069 H069 119.8 . . ?
C096 C070 H07A 109.5 . . ?
C096 C070 H07B 109.5 . . ?
H07A C070 H07B 109.5 . . ?
C096 C070 H07C 109.5 . . ?
H07A C070 H07C 109.5 . . ?
H07B C070 H07C 109.5 . . ?
C304 C072 C033 122.3(4) . . ?
C304 C072 N4 122.7(4) . . ?
C033 C072 N4 115.0(4) . . ?
C052 C073 C353 111.3(4) . . ?
C052 C073 P008 109.7(3) . . ?
C353 C073 P008 113.9(4) . . ?
C052 C073 H073 107.2 . . ?
C353 C073 H073 107.2 . . ?
P008 C073 H073 107.2 . . ?
C084 C074 C067 119.7(5) . . ?
C084 C074 H074 120.1 . . ?
C067 C074 H074 120.1 . . ?
C106 C075 C057 110.2(5) . . ?
C106 C075 P007 109.6(3) . . ?
C057 C075 P007 111.1(4) . . ?
C106 C075 H075 108.7 . . ?
C057 C075 H075 108.7 . . ?
P007 C075 H075 108.7 . . ?
C042 C078 C352 111.7(5) . . ?
C042 C078 P007 108.8(4) . . ?
C352 C078 P007 114.4(4) . . ?
C042 C078 H078 107.2 . . ?
C352 C078 H078 107.2 . . ?
P007 C078 H078 107.2 . . ?
C067 C079 C047 120.3(5) . . ?
C067 C079 N6 124.1(5) . . ?
C047 C079 N6 115.6(4) . . ?
C062 C081 C030 119.9(5) . . ?
C062 C081 H081 120.0 . . ?
C030 C081 H081 120.0 . . ?
C123 C082 C063 120.7(5) . . ?
C123 C082 H082 119.6 . . ?
C063 C082 H082 119.6 . . ?
C302 C083 H08A 109.5 . . ?
C302 C083 H08B 109.5 . . ?
H08A C083 H08B 109.5 . . ?
C302 C083 H08C 109.5 . . ?
H08A C083 H08C 109.5 . . ?
H08B C083 H08C 109.5 . . ?
C074 C084 C305 120.8(5) . . ?
C074 C084 H084 119.6 . . ?
C305 C084 H084 119.6 . . ?
C104 C085 C038 120.6(4) . . ?
C104 C085 H085 119.7 . . ?
C038 C085 H085 119.7 . . ?
N7 C086 C041 117.9(4) . . ?
N7 C086 C088 124.7(5) . . ?
C041 C086 C088 117.4(5) . . ?
N7 C087 P010 103.8(3) . . ?
N7 C087 H08D 111.0 . . ?
P010 C087 H08D 111.0 . . ?
N7 C087 H08E 111.0 . . ?
P010 C087 H08E 111.0 . . ?
H08D C087 H08E 109.0 . . ?
C040 C088 C086 119.7(5) . . ?
C040 C088 H088 120.1 . . ?
C086 C088 H088 120.1 . . ?
O2 C089 Co1 176.9(5) . . ?
C029 C090 H09A 109.5 . . ?
C029 C090 H09B 109.5 . . ?
H09A C090 H09B 109.5 . . ?
C029 C090 H09C 109.5 . . ?
H09A C090 H09C 109.5 . . ?
H09B C090 H09C 109.5 . . ?
O4 C091 Co2 178.1(5) . . ?
N1 C092 P008 102.4(3) . . ?
N1 C092 H09D 111.3 . . ?
P008 C092 H09D 111.3 . . ?
N1 C092 H09E 111.3 . . ?
P008 C092 H09E 111.3 . . ?
H09D C092 H09E 109.2 . . ?
C060 C093 H09F 109.5 . . ?
C060 C093 H09G 109.5 . . ?
H09F C093 H09G 109.5 . . ?
C060 C093 H09H 109.5 . . ?
H09F C093 H09H 109.5 . . ?
H09G C093 H09H 109.5 . . ?
C040 C094 C112 120.0(5) . . ?
C040 C094 H094 120.0 . . ?
C112 C094 H094 120.0 . . ?
C355 C095 H09I 109.5 . . ?
C355 C095 H09J 109.5 . . ?
H09I C095 H09J 109.5 . . ?
C355 C095 H09K 109.5 . . ?
H09I C095 H09K 109.5 . . ?
H09J C095 H09K 109.5 . . ?
C354 C096 C070 110.4(5) . . ?
C354 C096 P010 111.2(4) . . ?
C070 C096 P010 109.9(4) . . ?
C354 C096 H096 108.4 . . ?
C070 C096 H096 108.4 . . ?
P010 C096 H096 108.4 . . ?
C104 C100 C066 119.1(5) . . ?
C104 C100 H100 120.5 . . ?
C066 C100 H100 120.5 . . ?
C031 C103 H10A 109.5 . . ?
C031 C103 H10B 109.5 . . ?
H10A C103 H10B 109.5 . . ?
C031 C103 H10C 109.5 . . ?
H10A C103 H10C 109.5 . . ?
H10B C103 H10C 109.5 . . ?
C100 C104 C085 120.8(4) . . ?
C100 C104 H104 119.6 . . ?
C085 C104 H104 119.6 . . ?
C075 C106 H10D 109.5 . . ?
C075 C106 H10E 109.5 . . ?
H10D C106 H10E 109.5 . . ?
C075 C106 H10F 109.5 . . ?
H10D C106 H10F 109.5 . . ?
H10E C106 H10F 109.5 . . ?
C055 C109 C064 118.6(5) . . ?
C055 C109 H109 120.7 . . ?
C064 C109 H109 120.7 . . ?
O7 C111 Co2 177.5(5) . . ?
C041 C112 C094 119.1(5) . . ?
C041 C112 H112 120.5 . . ?
C094 C112 H112 120.5 . . ?
O6 C113 Co2 177.7(6) . . ?
C029 C114 H11A 109.5 . . ?
C029 C114 H11B 109.5 . . ?
H11A C114 H11B 109.5 . . ?
C029 C114 H11C 109.5 . . ?
H11A C114 H11C 109.5 . . ?
H11B C114 H11C 109.5 . . ?
C032 C115 C053 112.1(4) . . ?
C032 C115 P005 114.7(4) . . ?
C053 C115 P005 111.6(4) . . ?
C032 C115 H115 105.9 . . ?
C053 C115 H115 105.9 . . ?
P005 C115 H115 105.9 . . ?
C121 C119 C048 112.1(4) . . ?
C121 C119 P008 109.8(4) . . ?
C048 C119 P008 107.9(3) . . ?
C121 C119 H119 109.0 . . ?
C048 C119 H119 109.0 . . ?
P008 C119 H119 109.0 . . ?
C119 C121 H12A 109.5 . . ?
C119 C121 H12B 109.5 . . ?
H12A C121 H12B 109.5 . . ?
C119 C121 H12C 109.5 . . ?
H12A C121 H12C 109.5 . . ?
H12B C121 H12C 109.5 . . ?
C060 C122 H12D 109.5 . . ?
C060 C122 H12E 109.5 . . ?
H12D C122 H12E 109.5 . . ?
C060 C122 H12F 109.5 . . ?
H12D C122 H12F 109.5 . . ?
H12E C122 H12F 109.5 . . ?
C082 C123 C030 120.8(5) . . ?
C082 C123 H123 119.6 . . ?
C030 C123 H123 119.6 . . ?
N8 C125 P006 103.2(3) . . ?
N8 C125 H12G 111.1 . . ?
P006 C125 H12G 111.1 . . ?
N8 C125 H12H 111.1 . . ?
P006 C125 H12H 111.1 . . ?
H12G C125 H12H 109.1 . . ?
O5 C129 Co2 178.8(5) . . ?
O1 C300 Co1 178.1(5) . . ?
N2 C301 P007 103.9(3) . . ?
N2 C301 H30A 111.0 . . ?
P007 C301 H30A 111.0 . . ?
N2 C301 H30B 111.0 . . ?
P007 C301 H30B 111.0 . . ?
H30A C301 H30B 109.0 . . ?
C083 C302 C061 110.9(5) . . ?
C083 C302 P009 114.8(4) . . ?
C061 C302 P009 109.7(4) . . ?
C083 C302 H302 107.0 . . ?
C061 C302 H302 107.0 . . ?
P009 C302 H302 107.0 . . ?
C066 C303 C038 121.8(4) . . ?
C066 C303 N4 122.9(4) . . ?
C038 C303 N4 115.0(4) . . ?
C072 C304 C043 119.5(4) . . ?
C072 C304 H304 120.3 . . ?
C043 C304 H304 120.3 . . ?
C084 C305 C047 120.3(5) . . ?
C084 C305 H305 119.9 . . ?
C047 C305 H305 119.9 . . ?
O3 C350 Co1 177.9(5) . . ?
O8 C351 Co1 177.9(6) . . ?
C078 C352 H35G 109.5 . . ?
C078 C352 H35H 109.5 . . ?
H35G C352 H35H 109.5 . . ?
C078 C352 H35I 109.5 . . ?
H35G C352 H35I 109.5 . . ?
H35H C352 H35I 109.5 . . ?
C073 C353 H35D 109.5 . . ?
C073 C353 H35E 109.5 . . ?
H35D C353 H35E 109.5 . . ?
C073 C353 H35F 109.5 . . ?
H35D C353 H35F 109.5 . . ?
H35E C353 H35F 109.5 . . ?
C096 C354 H35A 109.5 . . ?
C096 C354 H35B 109.5 . . ?
H35A C354 H35B 109.5 . . ?
C096 C354 H35C 109.5 . . ?
H35A C354 H35C 109.5 . . ?
H35B C354 H35C 109.5 . . ?
C095 C355 C046 111.3(5) . . ?
C095 C355 P006 110.4(4) . . ?
C046 C355 P006 109.0(3) . . ?
C095 C355 H355 108.7 . . ?
C046 C355 H355 108.7 . . ?
P006 C355 H355 108.7 . . ?
C031 C356 H35J 109.5 . . ?
C031 C356 H35K 109.5 . . ?
H35J C356 H35K 109.5 . . ?
C031 C356 H35L 109.5 . . ?
H35J C356 H35L 109.5 . . ?
H35K C356 H35L 109.5 . . ?
C605 C600 C601 120.6(6) . . ?
C605 C600 H600 119.7 . . ?
C601 C600 H600 119.7 . . ?
C602 C601 C600 121.5(6) . . ?
C602 C601 H601 119.3 . . ?
C600 C601 H601 119.3 . . ?
C601 C602 C603 117.0(7) . . ?
C601 C602 H602 121.5 . . ?
C603 C602 H602 121.5 . . ?
C604 C603 C602 123.2(7) . . ?
C604 C603 H603 118.4 . . ?
C602 C603 H603 118.4 . . ?
C603 C604 C605 119.2(7) . . ?
C603 C604 H604 120.4 . . ?
C605 C604 H604 120.4 . . ?
C604 C605 C600 118.4(6) . . ?
C604 C605 C607 119.0(6) . . ?
C600 C605 C607 122.5(6) . . ?
C605 C607 H60A 109.5 . . ?
C605 C607 H60B 109.5 . . ?
H60A C607 H60B 109.5 . . ?
C605 C607 H60C 109.5 . . ?
H60A C607 H60C 109.5 . . ?
H60B C607 H60C 109.5 . . ?
C038 N1 C092 117.4(4) . . ?
C038 N1 Th1 120.3(3) . . ?
C092 N1 Th1 121.8(3) . . ?
C036 N2 C301 118.7(4) . . ?
C036 N2 Th1 118.4(3) . . ?
C301 N2 Th1 122.4(3) . . ?
C033 N3 C035 117.8(4) . . ?
C033 N3 Th1 119.2(3) . . ?
C035 N3 Th1 121.6(3) . . ?
C303 N4 C034 111.2(3) . . ?
C303 N4 C072 113.1(3) . . ?
C034 N4 C072 112.6(3) . . ?
C303 N4 Th1 106.6(3) . . ?
C034 N4 Th1 106.5(3) . . ?
C072 N4 Th1 106.3(3) . . ?
C047 N5 C051 118.6(4) . . ?
C047 N5 Th2 120.1(3) . . ?
C051 N5 Th2 120.8(3) . . ?
C062 N6 C079 114.1(4) . . ?
C062 N6 C041 112.2(4) . . ?
C079 N6 C041 111.1(4) . . ?
C062 N6 Th2 105.2(3) . . ?
C079 N6 Th2 106.0(3) . . ?
C041 N6 Th2 107.7(3) . . ?
C086 N7 C087 116.6(4) . . ?
C086 N7 Th2 121.4(3) . . ?
C087 N7 Th2 121.4(3) . . ?
C063 N8 C125 117.3(4) . . ?
C063 N8 Th2 119.5(3) . . ?
C125 N8 Th2 121.3(3) . . ?
C300 O1 Th1 170.3(3) . . ?
C111 O7 Th2 170.2(3) . . ?
C051 P005 C115 104.0(2) . . ?
C051 P005 C031 102.8(2) . . ?
C115 P005 C031 106.7(2) . . ?
C051 P005 Th2 76.33(15) . . ?
C115 P005 Th2 125.98(17) . . ?
C031 P005 Th2 126.28(19) . . ?
C355 P006 C029 104.6(2) . . ?
C355 P006 C125 105.4(2) . . ?
C029 P006 C125 105.6(2) . . ?
C355 P006 Th2 133.13(18) . . ?
C029 P006 Th2 119.39(17) . . ?
C125 P006 Th2 78.81(15) . . ?
C075 P007 C078 104.8(2) . . ?
C075 P007 C301 104.3(2) . . ?
C078 P007 C301 106.1(2) . . ?
C075 P007 Th1 127.65(17) . . ?
C078 P007 Th1 125.05(18) . . ?
C301 P007 Th1 78.46(15) . . ?
C073 P008 C119 106.4(2) . . ?
C073 P008 C092 105.8(2) . . ?
C119 P008 C092 105.0(2) . . ?
C073 P008 Th1 125.88(16) . . ?
C119 P008 Th1 123.99(17) . . ?
C092 P008 Th1 80.64(15) . . ?
C050 P009 C035 103.3(3) . . ?
C050 P009 C302 106.1(2) . . ?
C035 P009 C302 107.2(2) . . ?
C050 P009 Th1 126.77(18) . . ?
C035 P009 Th1 79.33(15) . . ?
C302 P009 Th1 124.14(17) . . ?
C087 P010 C096 104.3(2) . . ?
C087 P010 C060 103.7(2) . . ?
C096 P010 C060 105.7(2) . . ?
C087 P010 Th2 78.74(15) . . ?
C096 P010 Th2 133.04(17) . . ?
C060 P010 Th2 119.24(16) . . ?
C300 Co1 C089 108.5(3) . . ?
C300 Co1 C350 113.0(2) . . ?
C089 Co1 C350 109.4(3) . . ?
C300 Co1 C351 108.8(3) . . ?
C089 Co1 C351 109.2(3) . . ?
C350 Co1 C351 107.8(3) . . ?
C111 Co2 C091 110.0(2) . . ?
C111 Co2 C113 112.6(2) . . ?
C091 Co2 C113 107.4(3) . . ?
C111 Co2 C129 113.7(2) . . ?
C091 Co2 C129 110.3(3) . . ?
C113 Co2 C129 102.6(3) . . ?
N3 Th1 N2 103.52(13) . . ?
N3 Th1 N1 104.06(13) . . ?
N2 Th1 N1 101.61(13) . . ?
N3 Th1 O1 114.20(12) . . ?
N2 Th1 O1 115.03(12) . . ?
N1 Th1 O1 116.67(12) . . ?
N3 Th1 N4 64.95(12) . . ?
N2 Th1 N4 64.74(12) . . ?
N1 Th1 N4 64.41(12) . . ?
O1 Th1 N4 178.86(11) . . ?
N3 Th1 P008 150.35(10) . . ?
N2 Th1 P008 100.94(9) . . ?
N1 Th1 P008 54.23(9) . . ?
O1 Th1 P008 68.83(8) . . ?
N4 Th1 P008 112.29(8) . . ?
N3 Th1 P009 53.97(9) . . ?
N2 Th1 P009 149.74(9) . . ?
N1 Th1 P009 103.53(9) . . ?
O1 Th1 P009 67.24(8) . . ?
N4 Th1 P009 112.34(8) . . ?
P008 Th1 P009 107.31(4) . . ?
N3 Th1 P007 98.23(10) . . ?
N2 Th1 P007 53.43(9) . . ?
N1 Th1 P007 150.23(9) . . ?
O1 Th1 P007 69.88(8) . . ?
N4 Th1 P007 109.37(8) . . ?
P008 Th1 P007 109.78(3) . . ?
P009 Th1 P007 105.51(4) . . ?
N5 Th2 N8 104.72(14) . . ?
N5 Th2 N7 104.49(13) . . ?
N8 Th2 N7 100.69(14) . . ?
N5 Th2 O7 104.99(12) . . ?
N8 Th2 O7 119.38(12) . . ?
N7 Th2 O7 120.77(12) . . ?
N5 Th2 N6 64.99(13) . . ?
N8 Th2 N6 65.15(13) . . ?
N7 Th2 N6 64.59(12) . . ?
O7 Th2 N6 169.97(11) . . ?
N5 Th2 P006 150.02(10) . . ?
N8 Th2 P006 54.13(10) . . ?
N7 Th2 P006 100.69(10) . . ?
O7 Th2 P006 74.93(7) . . ?
N6 Th2 P006 113.34(9) . . ?
N5 Th2 P010 102.54(10) . . ?
N8 Th2 P010 146.53(10) . . ?
N7 Th2 P010 53.35(10) . . ?
O7 Th2 P010 70.69(7) . . ?
N6 Th2 P010 110.87(8) . . ?
P006 Th2 P010 105.48(4) . . ?
N5 Th2 P005 52.69(10) . . ?
N8 Th2 P005 91.44(10) . . ?
N7 Th2 P005 156.61(10) . . ?
O7 Th2 P005 67.97(7) . . ?
N6 Th2 P005 103.79(8) . . ?
P006 Th2 P005 102.62(3) . . ?
P010 Th2 P005 120.74(3) . . ?
 
_diffrn_measured_fraction_theta_max    0.971
_diffrn_reflns_theta_full              25.00
_diffrn_measured_fraction_theta_full   0.988
_refine_diff_density_max    1.467
_refine_diff_density_min   -1.255
_refine_diff_density_rms    0.143
# SQUEEZE RESULTS (APPEND TO CIF)
# Note: Data are Listed for all Voids in the P1 Unit Cell
# i.e. Centre of Gravity, Solvent Accessible Volume,
# Recovered number of Electrons in the Void and
# Details about the Squeezed Material
loop_
  _platon_squeeze_void_nr
  _platon_squeeze_void_average_x
  _platon_squeeze_void_average_y
  _platon_squeeze_void_average_z
  _platon_squeeze_void_volume
  _platon_squeeze_void_count_electrons
  _platon_squeeze_void_content
   1  0.081  0.182  0.106       202        61 ' '
   2 -0.081  0.818  0.894       202        61 ' '
   3  0.108  0.571  0.556         8         1 ' '
   4  0.891  0.429  0.444         8         1 ' '
_platon_squeeze_details
;
;

# ------ Material relevant to the Complex 5 ------ 


data_shelxl
 
_audit_creation_method            SHELXL-97
_chemical_name_systematic
;
 ?
;
_chemical_name_common             ‘Complex 5’
_chemical_melting_point           ?
_chemical_formula_moiety          'C43 H60 Co N4 O4 P3 U'
_chemical_formula_sum
 'C43 H60 Co N4 O4 P3 U'
_chemical_formula_weight          1086.82
 
loop_
 _atom_type_symbol
 _atom_type_description
 _atom_type_scat_dispersion_real
 _atom_type_scat_dispersion_imag
 _atom_type_scat_source
 'C'  'C'   0.0033   0.0016
 'International Tables Vol C Tables 4.2.6.8 and 6.1.1.4'
 'H'  'H'   0.0000   0.0000
 'International Tables Vol C Tables 4.2.6.8 and 6.1.1.4'
 'N'  'N'   0.0061   0.0033
 'International Tables Vol C Tables 4.2.6.8 and 6.1.1.4'
 'O'  'O'   0.0106   0.0060
 'International Tables Vol C Tables 4.2.6.8 and 6.1.1.4'
 'P'  'P'   0.1023   0.0942
 'International Tables Vol C Tables 4.2.6.8 and 6.1.1.4'
 'Co'  'Co'   0.3494   0.9721
 'International Tables Vol C Tables 4.2.6.8 and 6.1.1.4'
 'U'  'U'  -9.6767   9.6646
 'International Tables Vol C Tables 4.2.6.8 and 6.1.1.4'
 
_symmetry_cell_setting            Orthorhombic
_symmetry_space_group_name_H-M    Pna2(1)
 
loop_
 _symmetry_equiv_pos_as_xyz
 'x, y, z'
 '-x+1/2, y+1/2, z+1/2'
 'x+1/2, -y+1/2, z'
 '-x, -y, z+1/2'
 
_cell_length_a                    23.0608(9)
_cell_length_b                    14.0118(6)
_cell_length_c                    14.0919(6)
_cell_angle_alpha                 90.00
_cell_angle_beta                  90.00
_cell_angle_gamma                 90.00
_cell_volume                      4553.4(3)
_cell_formula_units_Z             4
_cell_measurement_temperature     100(2)
_cell_measurement_reflns_used     7578
_cell_measurement_theta_min       2.23
_cell_measurement_theta_max       25.30
 
_exptl_crystal_description        block
_exptl_crystal_colour             orange
_exptl_crystal_size_max           0.08
_exptl_crystal_size_mid           0.04
_exptl_crystal_size_min           0.02
_exptl_crystal_density_meas       a
_exptl_crystal_density_diffrn     1.585
_exptl_crystal_density_method     'not measured'
_exptl_crystal_F_000              2168
_exptl_absorpt_coefficient_mu     4.066
_exptl_absorpt_correction_type    multi-scan
_exptl_absorpt_correction_T_min   0.0117
_exptl_absorpt_correction_T_max   0.0452
_exptl_absorpt_process_details    SADABS
 
_exptl_special_details
;
 ?
;
 
_diffrn_ambient_temperature       100(2)
_diffrn_radiation_wavelength      0.71073
_diffrn_radiation_type            MoK\a
_diffrn_radiation_source          'microfocus sealed tube'
_diffrn_radiation_monochromator   'QUAZAR multilayer mirrors'
_diffrn_measurement_device_type   'Bruker APEX-II CCD'
_diffrn_measurement_method        '\f and \w scans'
_diffrn_detector_area_resol_mean  8.366
_diffrn_reflns_number             15382
_diffrn_reflns_av_R_equivalents   0.0905
_diffrn_reflns_av_sigmaI/netI     0.0937
_diffrn_reflns_limit_h_min        -27
_diffrn_reflns_limit_h_max        27
_diffrn_reflns_limit_k_min        -13
_diffrn_reflns_limit_k_max        16
_diffrn_reflns_limit_l_min        -9
_diffrn_reflns_limit_l_max        16
_diffrn_reflns_theta_min          1.70
_diffrn_reflns_theta_max          25.36
_reflns_number_total              6108
_reflns_number_gt                 4636
_reflns_threshold_expression      >2sigma(I)
 
_computing_data_collection        'Bruker APEX2'
_computing_cell_refinement        'Bruker SAINT'
_computing_data_reduction         'Bruker SAINT'
_computing_structure_solution     'SHELXS-97 (Sheldrick, 2008)'
_computing_structure_refinement   'SHELXL-97 (Sheldrick, 2008)'
_computing_molecular_graphics     'ORTEP-32'
_computing_publication_material   'WinGX'
 
_refine_special_details
;
 Refinement of F^2^ against ALL reflections.  The weighted R-factor wR and
 goodness of fit S are based on F^2^, conventional R-factors R are based
 on F, with F set to zero for negative F^2^. The threshold expression of
 F^2^ > 2sigma(F^2^) is used only for calculating R-factors(gt) etc. and is
 not relevant to the choice of reflections for refinement.  R-factors based
 on F^2^ are statistically about twice as large as those based on F, and R-
 factors based on ALL data will be even larger.
;
 
_refine_ls_structure_factor_coef  Fsqd
_refine_ls_matrix_type            full
_refine_ls_weighting_scheme       calc
_refine_ls_weighting_details
 'calc w=1/[\s^2^(Fo^2^)+(0.0622P)^2^+0.0000P] where P=(Fo^2^+2Fc^2^)/3'
_atom_sites_solution_primary      direct
_atom_sites_solution_secondary    difmap
_atom_sites_solution_hydrogens    geom
_refine_ls_hydrogen_treatment     constr
_refine_ls_extinction_method      none
_refine_ls_extinction_coef        ?
_refine_ls_abs_structure_details
 'Flack H D (1983), Acta Cryst. A39, 876-881'
_refine_ls_abs_structure_Flack    -0.024(8)
_refine_ls_number_reflns          6108
_refine_ls_number_parameters      517
_refine_ls_number_restraints      13
_refine_ls_R_factor_all           0.0654
_refine_ls_R_factor_gt            0.0479
_refine_ls_wR_factor_ref          0.1175
_refine_ls_wR_factor_gt           0.1112
_refine_ls_goodness_of_fit_ref    0.955
_refine_ls_restrained_S_all       0.954
_refine_ls_shift/su_max           0.017
_refine_ls_shift/su_mean          0.000
 
loop_
 _atom_site_label
 _atom_site_type_symbol
 _atom_site_fract_x
 _atom_site_fract_y
 _atom_site_fract_z
 _atom_site_U_iso_or_equiv
 _atom_site_adp_type
 _atom_site_occupancy
 _atom_site_symmetry_multiplicity
 _atom_site_calc_flag
 _atom_site_refinement_flags
 _atom_site_disorder_assembly
 _atom_site_disorder_group
C12 C 0.1143(5) 0.2426(9) -0.1969(9) 0.016(3) Uani 1 1 d . . .
C14 C 0.3519(6) 0.1724(10) -0.0814(10) 0.030(3) Uani 1 1 d . . .
H14A H 0.3169 0.2022 -0.1073 0.046 Uiso 1 1 calc R . .
H14B H 0.3497 0.1031 -0.0902 0.046 Uiso 1 1 calc R . .
H14C H 0.3860 0.1973 -0.1145 0.046 Uiso 1 1 calc R . .
C16 C 0.1845(5) 0.4408(8) 0.0103(10) 0.020(3) Uani 1 1 d . . .
H16A H 0.1790 0.4947 -0.0342 0.024 Uiso 1 1 calc R . .
H16B H 0.2170 0.4553 0.0538 0.024 Uiso 1 1 calc R . .
C17 C 0.1740(5) 0.2214(8) 0.2878(9) 0.013(3) Uani 1 1 d . . .
C18 C 0.2219(5) -0.0659(9) -0.2455(10) 0.019(3) Uani 1 1 d . . .
H18 H 0.2355 -0.1269 -0.2649 0.023 Uiso 1 1 calc R . .
C20 C 0.2499(5) 0.2729(8) -0.2719(10) 0.021(3) Uani 1 1 d . . .
H20 H 0.2450 0.2207 -0.3141 0.025 Uiso 1 1 calc R . .
C21 C 0.1715(5) 0.0773(9) -0.2798(10) 0.024(3) Uani 1 1 d . . .
H21 H 0.1485 0.1141 -0.3220 0.029 Uiso 1 1 calc R . .
C22 C 0.2146(5) 0.0563(8) -0.1246(9) 0.017(3) Uani 1 1 d . . .
C23 C 0.2894(5) 0.3452(9) -0.2915(9) 0.027(3) Uani 1 1 d . . .
H23 H 0.3115 0.3421 -0.3483 0.033 Uiso 1 1 calc R . .
C25 C 0.1840(5) 0.1135(8) -0.1938(9) 0.019(3) Uani 1 1 d . . .
C26 C 0.0684(6) -0.0593(9) 0.0774(9) 0.024(3) Uani 1 1 d . . .
H26 H 0.0853 -0.0935 0.1332 0.029 Uiso 1 1 calc R . .
C27 C 0.2342(6) -0.0344(10) -0.1541(10) 0.029(3) Uani 1 1 d . . .
H27 H 0.2557 -0.0737 -0.1118 0.035 Uiso 1 1 calc R . .
C28 C 0.2257(5) 0.3555(9) -0.1227(9) 0.017(3) Uani 1 1 d . . .
C30 C 0.0605(5) 0.4592(9) -0.0069(10) 0.031(3) Uani 1 1 d . . .
H30 H 0.0698 0.4305 -0.0702 0.037 Uiso 1 1 calc R . .
C31 C 0.2973(6) 0.4211(10) -0.2307(10) 0.027(3) Uani 1 1 d . . .
H31 H 0.3245 0.4696 -0.2461 0.032 Uiso 1 1 calc R . .
C32 C 0.0280(6) 0.0206(10) 0.2850(11) 0.043(4) Uani 1 1 d . . .
H32A H 0.0664 0.0364 0.3102 0.064 Uiso 1 1 calc R . .
H32B H 0.0275 -0.0462 0.2644 0.064 Uiso 1 1 calc R . .
H32C H -0.0012 0.0300 0.3347 0.064 Uiso 1 1 calc R . .
C33 C 0.0663(5) 0.2154(8) -0.1346(10) 0.018(3) Uani 1 1 d . . .
C34 C 0.0072(6) -0.1007(10) 0.0606(10) 0.040(4) Uani 1 1 d . . .
H34A H -0.0105 -0.0695 0.0054 0.059 Uiso 1 1 calc R . .
H34B H -0.0169 -0.0894 0.1168 0.059 Uiso 1 1 calc R . .
H34C H 0.0101 -0.1695 0.0488 0.059 Uiso 1 1 calc R . .
C35 C 0.2657(5) 0.4269(9) -0.1474(10) 0.020(3) Uani 1 1 d . . .
H35 H 0.2712 0.4799 -0.1064 0.024 Uiso 1 1 calc R . .
C36 C 0.2177(5) 0.2793(8) -0.1889(9) 0.014(2) Uani 1 1 d U . .
C38 C 0.0142(5) 0.0858(9) 0.2001(9) 0.025(3) Uani 1 1 d . . .
H38 H -0.0246 0.0680 0.1740 0.030 Uiso 1 1 calc R . .
C39 C 0.1431(5) 0.1137(10) 0.4551(9) 0.021(3) Uani 1 1 d . . .
C40 C 0.1906(6) -0.0112(9) -0.3093(9) 0.029(3) Uani 1 1 d . . .
H40 H 0.1826 -0.0338 -0.3715 0.035 Uiso 1 1 calc R . .
C41 C 0.1074(6) -0.0789(9) -0.0068(9) 0.026(3) Uani 1 1 d . . .
H41A H 0.1063 -0.1471 -0.0221 0.039 Uiso 1 1 calc R . .
H41B H 0.1473 -0.0604 0.0088 0.039 Uiso 1 1 calc R . .
H41C H 0.0940 -0.0420 -0.0616 0.039 Uiso 1 1 calc R . .
C42 C 0.3509(6) 0.0219(10) 0.2011(10) 0.034(4) Uani 1 1 d . . .
H42A H 0.3808 0.0291 0.1523 0.050 Uiso 1 1 calc R . .
H42B H 0.3242 -0.0292 0.1828 0.050 Uiso 1 1 calc R . .
H42C H 0.3692 0.0059 0.2618 0.050 Uiso 1 1 calc R . .
C43 C 0.2466(7) 0.2196(9) 0.4578(10) 0.030(3) Uani 1 1 d . . .
C44 C 0.3567(4) 0.1957(7) 0.0270(15) 0.021(2) Uani 1 1 d . . .
H44 H 0.3907 0.1605 0.0536 0.025 Uiso 1 1 calc R . .
C46 C 0.3176(5) 0.1148(9) 0.2110(10) 0.024(3) Uani 1 1 d . . .
H46 H 0.2833 0.1022 0.2525 0.028 Uiso 1 1 calc R . .
C47 C 0.0330(5) 0.1293(9) 0.0033(8) 0.025(4) Uani 1 1 d . . .
H47A H 0.0131 0.0818 -0.0372 0.030 Uiso 1 1 calc R . .
H47B H 0.0042 0.1768 0.0256 0.030 Uiso 1 1 calc R . .
C48 C 0.0017(5) 0.4177(8) 0.0228(18) 0.050(4) Uani 1 1 d . . .
H48A H -0.0056 0.4327 0.0897 0.074 Uiso 1 1 calc R . .
H48B H 0.0021 0.3483 0.0142 0.074 Uiso 1 1 calc R . .
H48C H -0.0290 0.4457 -0.0165 0.074 Uiso 1 1 calc R . .
C49 C 0.2640(4) 0.0521(7) 0.0324(14) 0.023(3) Uani 1 1 d . . .
H49A H 0.2957 0.0198 -0.0025 0.028 Uiso 1 1 calc R . .
H49B H 0.2456 0.0063 0.0768 0.028 Uiso 1 1 calc R . .
C50 C 0.1374(6) 0.3191(10) 0.4565(10) 0.028(3) Uani 1 1 d . . .
C52 C 0.3665(5) 0.3019(8) 0.0406(14) 0.029(4) Uani 1 1 d . . .
H52A H 0.4017 0.3213 0.0067 0.044 Uiso 1 1 calc R . .
H52B H 0.3709 0.3158 0.1083 0.044 Uiso 1 1 calc R . .
H52C H 0.3332 0.3372 0.0155 0.044 Uiso 1 1 calc R . .
C53 C 0.3551(8) 0.1913(10) 0.2606(12) 0.050(5) Uani 1 1 d . . .
H53A H 0.3644 0.1701 0.3251 0.074 Uiso 1 1 calc R . .
H53B H 0.3335 0.2515 0.2634 0.074 Uiso 1 1 calc R . .
H53C H 0.3910 0.2007 0.2246 0.074 Uiso 1 1 calc R . .
C101 C 0.0122(6) 0.1897(11) 0.2332(13) 0.038(4) Uani 1 1 d . . .
H10A H -0.0170 0.1966 0.2833 0.057 Uiso 1 1 calc R . .
H10B H 0.0021 0.2310 0.1796 0.057 Uiso 1 1 calc R . .
H10C H 0.0503 0.2082 0.2580 0.057 Uiso 1 1 calc R . .
C301 C 0.0119(6) 0.2334(10) -0.1657(10) 0.023(4) Uani 1 1 d . . .
H301 H -0.0204 0.2142 -0.1285 0.027 Uiso 1 1 calc R . .
C302 C 0.0025(5) 0.2820(8) -0.2560(8) 0.018(3) Uani 1 1 d . . .
H302 H -0.0359 0.2945 -0.2774 0.021 Uiso 1 1 calc R . .
C303 C 0.0484(5) 0.3090(8) -0.3087(9) 0.021(3) Uani 1 1 d . . .
H303 H 0.0419 0.3432 -0.3660 0.025 Uiso 1 1 calc R . .
C304 C 0.1048(5) 0.2882(8) -0.2816(10) 0.020(3) Uani 1 1 d . . .
H304 H 0.1364 0.3054 -0.3212 0.024 Uiso 1 1 calc R . .
C401 C 0.1180(8) 0.4848(13) 0.1890(12) 0.071(7) Uani 1 1 d . . .
H401 H 0.1497 0.4509 0.2237 0.085 Uiso 1 1 calc R . .
C402 C 0.1456(6) 0.5821(9) 0.1769(10) 0.031(3) Uani 1 1 d . . .
H40A H 0.1162 0.6280 0.1559 0.047 Uiso 1 1 calc R . .
H40B H 0.1766 0.5782 0.1294 0.047 Uiso 1 1 calc R . .
H40C H 0.1620 0.6030 0.2376 0.047 Uiso 1 1 calc R . .
C403 C 0.0728(9) 0.4690(13) 0.2500(14) 0.087(7) Uani 1 1 d . . .
H40D H 0.0756 0.5132 0.3037 0.130 Uiso 1 1 calc R . .
H40E H 0.0744 0.4032 0.2733 0.130 Uiso 1 1 calc R . .
H40F H 0.0361 0.4794 0.2166 0.130 Uiso 1 1 calc R . .
C451 C 0.0576(7) 0.5655(12) -0.0222(14) 0.067(6) Uani 1 1 d . . .
H45A H 0.0454 0.5788 -0.0874 0.101 Uiso 1 1 calc R . .
H45B H 0.0960 0.5936 -0.0111 0.101 Uiso 1 1 calc R . .
H45C H 0.0296 0.5934 0.0222 0.101 Uiso 1 1 calc R . .
N13 N 0.0813(4) 0.1765(7) -0.0490(7) 0.018(2) Uani 1 1 d . . .
N201 N 0.1713(5) 0.2109(8) -0.1592(14) 0.019(4) Uani 1 1 d U . .
N202 N 0.2220(4) 0.0938(7) -0.0316(7) 0.019(2) Uani 1 1 d . . .
N203 N 0.1933(4) 0.3519(7) -0.0392(7) 0.017(2) Uani 1 1 d . . .
O6 O 0.1720(4) 0.2246(7) 0.2061(12) 0.027(3) Uani 1 1 d . . .
O101 O 0.1232(4) 0.0430(7) 0.4849(7) 0.035(2) Uani 1 1 d . . .
O102 O 0.2939(4) 0.2177(8) 0.4866(7) 0.043(3) Uani 1 1 d . . .
O103 O 0.1139(4) 0.3859(7) 0.4831(7) 0.040(3) Uani 1 1 d . . .
P3 P 0.29000(13) 0.1598(2) 0.0945(2) 0.0199(7) Uani 1 1 d . . .
P4 P 0.11603(15) 0.4125(2) 0.0770(2) 0.0231(8) Uani 1 1 d . . .
P5 P 0.06971(13) 0.0704(2) 0.1051(2) 0.0204(7) Uani 1 1 d . . .
Co2 Co 0.17539(7) 0.21766(12) 0.41075(13) 0.0218(4) Uani 1 1 d . . .
U1 U 0.165393(14) 0.21216(3) 0.02462(4) 0.01496(12) Uani 1 1 d . . .
 
loop_
 _atom_site_aniso_label
 _atom_site_aniso_U_11
 _atom_site_aniso_U_22
 _atom_site_aniso_U_33
 _atom_site_aniso_U_23
 _atom_site_aniso_U_13
 _atom_site_aniso_U_12
C12 0.020(6) 0.021(7) 0.008(7) -0.004(5) 0.005(5) -0.004(5)
C14 0.037(8) 0.028(8) 0.027(9) 0.003(7) 0.021(6) 0.000(6)
C16 0.026(6) 0.022(6) 0.013(10) 0.000(6) 0.000(5) 0.002(4)
C17 0.021(6) 0.007(6) 0.010(7) 0.005(5) 0.004(5) -0.003(5)
C18 0.025(7) 0.018(7) 0.013(8) -0.007(6) 0.002(6) 0.001(6)
C20 0.030(6) 0.016(7) 0.017(7) 0.006(6) -0.003(6) 0.003(5)
C21 0.023(6) 0.031(7) 0.018(7) 0.004(7) -0.002(6) 0.003(6)
C22 0.012(6) 0.024(7) 0.015(7) 0.009(6) 0.006(5) 0.004(5)
C23 0.026(7) 0.042(8) 0.015(8) 0.007(7) 0.010(6) 0.000(6)
C25 0.032(7) 0.013(7) 0.011(7) 0.004(5) 0.010(6) 0.013(5)
C26 0.035(7) 0.027(8) 0.011(7) 0.002(6) -0.003(6) 0.001(6)
C27 0.040(8) 0.025(8) 0.022(8) 0.005(6) 0.007(6) 0.007(6)
C28 0.020(6) 0.022(7) 0.010(7) 0.006(6) -0.008(5) 0.003(5)
C30 0.028(7) 0.030(8) 0.035(9) 0.012(6) 0.001(6) 0.003(6)
C31 0.033(8) 0.027(8) 0.020(9) 0.005(7) 0.012(6) -0.004(6)
C32 0.066(10) 0.041(10) 0.021(9) 0.001(7) 0.018(8) 0.000(8)
C33 0.014(6) 0.011(6) 0.031(8) -0.011(6) 0.003(5) -0.009(5)
C34 0.050(9) 0.032(8) 0.036(10) -0.001(6) 0.004(7) -0.013(7)
C35 0.035(7) 0.006(6) 0.020(8) 0.001(6) -0.004(6) -0.004(5)
C36 0.018(4) 0.009(4) 0.014(4) 0.004(4) 0.003(4) 0.001(4)
C38 0.018(6) 0.044(9) 0.013(8) 0.009(6) 0.004(5) -0.005(6)
C39 0.026(7) 0.031(8) 0.008(7) -0.001(6) -0.004(5) 0.001(6)
C40 0.061(9) 0.018(7) 0.009(7) -0.007(5) 0.004(6) 0.005(6)
C41 0.041(8) 0.016(7) 0.020(8) -0.002(5) 0.002(6) -0.003(6)
C42 0.051(9) 0.031(8) 0.019(9) 0.001(6) -0.004(7) 0.005(6)
C43 0.057(9) 0.024(7) 0.010(7) -0.009(6) 0.014(6) 0.002(7)
C44 0.024(5) 0.021(6) 0.017(6) -0.005(9) -0.014(10) 0.008(4)
C46 0.026(7) 0.030(7) 0.015(7) -0.003(6) -0.003(6) 0.001(5)
C47 0.020(6) 0.034(7) 0.020(11) 0.005(6) 0.002(5) 0.004(5)
C48 0.024(6) 0.029(7) 0.095(13) 0.034(13) -0.027(11) -0.012(5)
C49 0.018(5) 0.023(6) 0.028(7) 0.009(9) 0.002(9) 0.000(4)
C50 0.047(8) 0.022(8) 0.017(8) 0.013(6) 0.007(7) -0.004(6)
C52 0.032(6) 0.029(7) 0.026(11) 0.001(7) 0.000(7) -0.002(5)
C53 0.087(12) 0.038(10) 0.024(9) -0.005(7) -0.028(9) 0.011(8)
C101 0.037(9) 0.050(11) 0.026(10) 0.009(9) 0.018(7) 0.000(7)
C301 0.038(9) 0.015(8) 0.015(9) 0.000(6) 0.004(6) -0.005(6)
C302 0.024(6) 0.015(6) 0.014(7) 0.005(5) -0.007(5) 0.001(5)
C303 0.036(7) 0.014(7) 0.013(7) 0.004(5) -0.005(6) -0.003(5)
C304 0.029(6) 0.017(6) 0.014(6) 0.004(6) 0.002(6) -0.004(5)
C401 0.100(14) 0.074(13) 0.039(12) -0.045(10) 0.048(10) -0.053(11)
C402 0.045(8) 0.022(7) 0.026(9) 0.000(6) 0.011(6) -0.004(6)
C403 0.156(19) 0.051(12) 0.053(14) -0.035(10) 0.062(14) -0.031(13)
C451 0.038(9) 0.066(12) 0.099(17) 0.042(11) 0.028(9) 0.008(8)
N13 0.022(5) 0.019(5) 0.013(6) 0.004(4) 0.008(4) 0.010(4)
N201 0.015(5) 0.022(5) 0.020(6) 0.000(4) -0.004(4) 0.000(4)
N202 0.026(5) 0.022(6) 0.009(6) 0.008(4) -0.001(4) 0.002(4)
N203 0.026(5) 0.011(5) 0.012(6) -0.001(4) -0.002(4) -0.002(4)
O6 0.037(6) 0.024(6) 0.021(8) -0.005(5) 0.002(5) -0.003(4)
O101 0.038(5) 0.036(6) 0.030(6) 0.017(5) 0.005(4) -0.001(4)
O102 0.034(6) 0.064(7) 0.032(6) -0.003(5) -0.006(5) -0.004(5)
O103 0.062(6) 0.029(6) 0.028(6) -0.013(5) 0.011(5) 0.008(5)
P3 0.0220(16) 0.0231(19) 0.0145(19) 0.0040(15) -0.0017(14) 0.0029(14)
P4 0.0326(18) 0.0226(19) 0.0140(19) -0.0051(15) 0.0050(15) -0.0051(15)
P5 0.0267(17) 0.0235(19) 0.0110(18) 0.0043(15) -0.0008(14) -0.0054(14)
Co2 0.0335(10) 0.0222(10) 0.0096(9) 0.0007(8) 0.0019(7) 0.0013(8)
U1 0.01967(19) 0.01745(19) 0.00776(19) 0.0022(4) 0.0001(3) -0.00004(18)
 
_geom_special_details
;
 All esds (except the esd in the dihedral angle between two l.s. planes)
 are estimated using the full covariance matrix.  The cell esds are taken
 into account individually in the estimation of esds in distances, angles
 and torsion angles; correlations between esds in cell parameters are only
 used when they are defined by crystal symmetry.  An approximate (isotropic)
 treatment of cell esds is used for estimating esds involving l.s. planes.
;
 
loop_
 _geom_bond_atom_site_label_1
 _geom_bond_atom_site_label_2
 _geom_bond_distance
 _geom_bond_site_symmetry_2
 _geom_bond_publ_flag
C12 C304 1.371(17) . ?
C12 C33 1.463(17) . ?
C12 N201 1.485(16) . ?
C14 C44 1.57(2) . ?
C14 H14A 0.9800 . ?
C14 H14B 0.9800 . ?
C14 H14C 0.9800 . ?
C16 N203 1.442(15) . ?
C16 P4 1.880(12) . ?
C16 H16A 0.9900 . ?
C16 H16B 0.9900 . ?
C17 O6 1.15(2) . ?
C17 Co2 1.734(13) . ?
C18 C40 1.384(18) . ?
C18 C27 1.391(18) . ?
C18 H18 0.9500 . ?
C20 C36 1.388(17) . ?
C20 C23 1.390(17) . ?
C20 H20 0.9500 . ?
C21 C25 1.345(18) . ?
C21 C40 1.379(17) . ?
C21 H21 0.9500 . ?
C22 C27 1.413(17) . ?
C22 N202 1.423(15) . ?
C22 C25 1.446(16) . ?
C23 C31 1.378(19) . ?
C23 H23 0.9500 . ?
C25 N201 1.479(17) . ?
C26 C41 1.514(16) . ?
C26 C34 1.545(17) . ?
C26 P5 1.859(13) . ?
C26 H26 1.0000 . ?
C27 H27 0.9500 . ?
C28 N203 1.393(15) . ?
C28 C35 1.406(16) . ?
C28 C36 1.430(17) . ?
C30 C451 1.51(2) . ?
C30 C48 1.535(17) . ?
C30 P4 1.861(13) . ?
C30 H30 1.0000 . ?
C31 C35 1.384(18) . ?
C31 H31 0.9500 . ?
C32 C38 1.539(19) . ?
C32 H32A 0.9800 . ?
C32 H32B 0.9800 . ?
C32 H32C 0.9800 . ?
C33 C301 1.353(18) . ?
C33 N13 1.367(17) . ?
C34 H34A 0.9800 . ?
C34 H34B 0.9800 . ?
C34 H34C 0.9800 . ?
C35 H35 0.9500 . ?
C36 N201 1.497(16) . ?
C38 C101 1.530(19) . ?
C38 P5 1.864(12) . ?
C38 H38 1.0000 . ?
C39 O101 1.170(15) . ?
C39 Co2 1.751(14) . ?
C40 H40 0.9500 . ?
C41 H41A 0.9800 . ?
C41 H41B 0.9800 . ?
C41 H41C 0.9800 . ?
C42 C46 1.518(17) . ?
C42 H42A 0.9800 . ?
C42 H42B 0.9800 . ?
C42 H42C 0.9800 . ?
C43 O102 1.164(16) . ?
C43 Co2 1.772(16) . ?
C44 C52 1.518(14) . ?
C44 P3 1.878(15) . ?
C44 H44 1.0000 . ?
C46 C53 1.542(18) . ?
C46 P3 1.870(13) . ?
C46 H46 1.0000 . ?
C47 N13 1.491(14) . ?
C47 P5 1.859(12) . ?
C47 H47A 0.9900 . ?
C47 H47B 0.9900 . ?
C48 H48A 0.9800 . ?
C48 H48B 0.9800 . ?
C48 H48C 0.9800 . ?
C49 N202 1.447(16) . ?
C49 P3 1.845(13) . ?
C49 H49A 0.9900 . ?
C49 H49B 0.9900 . ?
C50 O103 1.146(16) . ?
C50 Co2 1.790(15) . ?
C52 H52A 0.9800 . ?
C52 H52B 0.9800 . ?
C52 H52C 0.9800 . ?
C53 H53A 0.9800 . ?
C53 H53B 0.9800 . ?
C53 H53C 0.9800 . ?
C101 H10A 0.9800 . ?
C101 H10B 0.9800 . ?
C101 H10C 0.9800 . ?
C301 C302 1.459(18) . ?
C301 H301 0.9500 . ?
C302 C303 1.348(17) . ?
C302 H302 0.9500 . ?
C303 C304 1.387(16) . ?
C303 H303 0.9500 . ?
C304 H304 0.9500 . ?
C401 C403 1.37(2) . ?
C401 C402 1.515(19) . ?
C401 P4 1.876(15) . ?
C401 H401 1.0000 . ?
C402 H40A 0.9800 . ?
C402 H40B 0.9800 . ?
C402 H40C 0.9800 . ?
C403 H40D 0.9800 . ?
C403 H40E 0.9800 . ?
C403 H40F 0.9800 . ?
C451 H45A 0.9800 . ?
C451 H45B 0.9800 . ?
C451 H45C 0.9800 . ?
N13 U1 2.256(10) . ?
N201 U1 2.594(19) . ?
N202 U1 2.254(10) . ?
N203 U1 2.250(9) . ?
O6 U1 2.567(17) . ?
P3 U1 3.125(3) . ?
P4 U1 3.117(3) . ?
P5 U1 3.178(3) . ?
 
loop_
 _geom_angle_atom_site_label_1
 _geom_angle_atom_site_label_2
 _geom_angle_atom_site_label_3
 _geom_angle
 _geom_angle_site_symmetry_1
 _geom_angle_site_symmetry_3
 _geom_angle_publ_flag
C304 C12 C33 121.6(11) . . ?
C304 C12 N201 126.3(11) . . ?
C33 C12 N201 112.1(12) . . ?
C44 C14 H14A 109.5 . . ?
C44 C14 H14B 109.5 . . ?
H14A C14 H14B 109.5 . . ?
C44 C14 H14C 109.5 . . ?
H14A C14 H14C 109.5 . . ?
H14B C14 H14C 109.5 . . ?
N203 C16 P4 100.3(7) . . ?
N203 C16 H16A 111.7 . . ?
P4 C16 H16A 111.7 . . ?
N203 C16 H16B 111.7 . . ?
P4 C16 H16B 111.7 . . ?
H16A C16 H16B 109.5 . . ?
O6 C17 Co2 178.7(11) . . ?
C40 C18 C27 122.2(12) . . ?
C40 C18 H18 118.9 . . ?
C27 C18 H18 118.9 . . ?
C36 C20 C23 118.1(12) . . ?
C36 C20 H20 120.9 . . ?
C23 C20 H20 120.9 . . ?
C25 C21 C40 122.9(12) . . ?
C25 C21 H21 118.6 . . ?
C40 C21 H21 118.6 . . ?
C27 C22 N202 124.4(11) . . ?
C27 C22 C25 117.2(12) . . ?
N202 C22 C25 118.3(11) . . ?
C31 C23 C20 121.7(12) . . ?
C31 C23 H23 119.2 . . ?
C20 C23 H23 119.2 . . ?
C21 C25 C22 120.1(11) . . ?
C21 C25 N201 127.1(12) . . ?
C22 C25 N201 112.7(12) . . ?
C41 C26 C34 110.8(10) . . ?
C41 C26 P5 109.4(9) . . ?
C34 C26 P5 114.5(9) . . ?
C41 C26 H26 107.3 . . ?
C34 C26 H26 107.3 . . ?
P5 C26 H26 107.3 . . ?
C18 C27 C22 119.5(12) . . ?
C18 C27 H27 120.3 . . ?
C22 C27 H27 120.3 . . ?
N203 C28 C35 125.9(11) . . ?
N203 C28 C36 117.1(10) . . ?
C35 C28 C36 117.0(11) . . ?
C451 C30 C48 111.9(11) . . ?
C451 C30 P4 118.0(11) . . ?
C48 C30 P4 107.6(10) . . ?
C451 C30 H30 106.2 . . ?
C48 C30 H30 106.2 . . ?
P4 C30 H30 106.2 . . ?
C23 C31 C35 120.2(12) . . ?
C23 C31 H31 119.9 . . ?
C35 C31 H31 119.9 . . ?
C38 C32 H32A 109.5 . . ?
C38 C32 H32B 109.5 . . ?
H32A C32 H32B 109.5 . . ?
C38 C32 H32C 109.5 . . ?
H32A C32 H32C 109.5 . . ?
H32B C32 H32C 109.5 . . ?
C301 C33 N13 126.5(11) . . ?
C301 C33 C12 117.2(13) . . ?
N13 C33 C12 116.3(10) . . ?
C26 C34 H34A 109.5 . . ?
C26 C34 H34B 109.5 . . ?
H34A C34 H34B 109.5 . . ?
C26 C34 H34C 109.5 . . ?
H34A C34 H34C 109.5 . . ?
H34B C34 H34C 109.5 . . ?
C31 C35 C28 121.0(12) . . ?
C31 C35 H35 119.5 . . ?
C28 C35 H35 119.5 . . ?
C20 C36 C28 122.0(11) . . ?
C20 C36 N201 125.2(12) . . ?
C28 C36 N201 112.8(11) . . ?
C101 C38 C32 109.5(12) . . ?
C101 C38 P5 110.5(9) . . ?
C32 C38 P5 110.4(9) . . ?
C101 C38 H38 108.8 . . ?
C32 C38 H38 108.8 . . ?
P5 C38 H38 108.8 . . ?
O101 C39 Co2 177.9(11) . . ?
C21 C40 C18 117.9(13) . . ?
C21 C40 H40 121.0 . . ?
C18 C40 H40 121.0 . . ?
C26 C41 H41A 109.5 . . ?
C26 C41 H41B 109.5 . . ?
H41A C41 H41B 109.5 . . ?
C26 C41 H41C 109.5 . . ?
H41A C41 H41C 109.5 . . ?
H41B C41 H41C 109.5 . . ?
C46 C42 H42A 109.5 . . ?
C46 C42 H42B 109.5 . . ?
H42A C42 H42B 109.5 . . ?
C46 C42 H42C 109.5 . . ?
H42A C42 H42C 109.5 . . ?
H42B C42 H42C 109.5 . . ?
O102 C43 Co2 177.3(12) . . ?
C52 C44 C14 109.8(14) . . ?
C52 C44 P3 108.7(10) . . ?
C14 C44 P3 112.4(8) . . ?
C52 C44 H44 108.7 . . ?
C14 C44 H44 108.7 . . ?
P3 C44 H44 108.7 . . ?
C42 C46 C53 110.8(11) . . ?
C42 C46 P3 112.4(9) . . ?
C53 C46 P3 110.7(9) . . ?
C42 C46 H46 107.6 . . ?
C53 C46 H46 107.6 . . ?
P3 C46 H46 107.6 . . ?
N13 C47 P5 103.8(7) . . ?
N13 C47 H47A 111.0 . . ?
P5 C47 H47A 111.0 . . ?
N13 C47 H47B 111.0 . . ?
P5 C47 H47B 111.0 . . ?
H47A C47 H47B 109.0 . . ?
C30 C48 H48A 109.5 . . ?
C30 C48 H48B 109.5 . . ?
H48A C48 H48B 109.5 . . ?
C30 C48 H48C 109.5 . . ?
H48A C48 H48C 109.5 . . ?
H48B C48 H48C 109.5 . . ?
N202 C49 P3 100.5(7) . . ?
N202 C49 H49A 111.7 . . ?
P3 C49 H49A 111.7 . . ?
N202 C49 H49B 111.7 . . ?
P3 C49 H49B 111.7 . . ?
H49A C49 H49B 109.4 . . ?
O103 C50 Co2 177.5(12) . . ?
C44 C52 H52A 109.5 . . ?
C44 C52 H52B 109.5 . . ?
H52A C52 H52B 109.5 . . ?
C44 C52 H52C 109.5 . . ?
H52A C52 H52C 109.5 . . ?
H52B C52 H52C 109.5 . . ?
C46 C53 H53A 109.5 . . ?
C46 C53 H53B 109.5 . . ?
H53A C53 H53B 109.5 . . ?
C46 C53 H53C 109.5 . . ?
H53A C53 H53C 109.5 . . ?
H53B C53 H53C 109.5 . . ?
C38 C101 H10A 109.5 . . ?
C38 C101 H10B 109.5 . . ?
H10A C101 H10B 109.5 . . ?
C38 C101 H10C 109.5 . . ?
H10A C101 H10C 109.5 . . ?
H10B C101 H10C 109.5 . . ?
C33 C301 C302 120.6(13) . . ?
C33 C301 H301 119.7 . . ?
C302 C301 H301 119.7 . . ?
C303 C302 C301 119.6(12) . . ?
C303 C302 H302 120.2 . . ?
C301 C302 H302 120.2 . . ?
C302 C303 C304 121.7(11) . . ?
C302 C303 H303 119.1 . . ?
C304 C303 H303 119.1 . . ?
C12 C304 C303 119.2(11) . . ?
C12 C304 H304 120.4 . . ?
C303 C304 H304 120.4 . . ?
C403 C401 C402 122.4(15) . . ?
C403 C401 P4 115.0(12) . . ?
C402 C401 P4 113.7(11) . . ?
C403 C401 H401 100.0 . . ?
C402 C401 H401 100.0 . . ?
P4 C401 H401 100.0 . . ?
C401 C402 H40A 109.5 . . ?
C401 C402 H40B 109.5 . . ?
H40A C402 H40B 109.5 . . ?
C401 C402 H40C 109.5 . . ?
H40A C402 H40C 109.5 . . ?
H40B C402 H40C 109.5 . . ?
C401 C403 H40D 109.5 . . ?
C401 C403 H40E 109.5 . . ?
H40D C403 H40E 109.5 . . ?
C401 C403 H40F 109.5 . . ?
H40D C403 H40F 109.5 . . ?
H40E C403 H40F 109.5 . . ?
C30 C451 H45A 109.5 . . ?
C30 C451 H45B 109.5 . . ?
H45A C451 H45B 109.5 . . ?
C30 C451 H45C 109.5 . . ?
H45A C451 H45C 109.5 . . ?
H45B C451 H45C 109.5 . . ?
C33 N13 C47 115.1(9) . . ?
C33 N13 U1 122.3(7) . . ?
C47 N13 U1 120.9(7) . . ?
C25 N201 C12 109.5(11) . . ?
C25 N201 C36 110.9(11) . . ?
C12 N201 C36 110.0(11) . . ?
C25 N201 U1 110.2(9) . . ?
C12 N201 U1 108.0(9) . . ?
C36 N201 U1 108.2(9) . . ?
C22 N202 C49 120.3(10) . . ?
C22 N202 U1 121.8(7) . . ?
C49 N202 U1 117.8(9) . . ?
C28 N203 C16 117.0(10) . . ?
C28 N203 U1 121.5(8) . . ?
C16 N203 U1 121.2(7) . . ?
C17 O6 U1 173.8(9) . . ?
C49 P3 C46 104.6(6) . . ?
C49 P3 C44 104.2(7) . . ?
C46 P3 C44 104.8(6) . . ?
C49 P3 U1 75.1(3) . . ?
C46 P3 U1 132.0(4) . . ?
C44 P3 U1 122.0(5) . . ?
C30 P4 C401 111.2(9) . . ?
C30 P4 C16 100.7(6) . . ?
C401 P4 C16 106.6(6) . . ?
C30 P4 U1 114.7(5) . . ?
C401 P4 U1 132.6(8) . . ?
C16 P4 U1 76.4(4) . . ?
C47 P5 C26 105.3(6) . . ?
C47 P5 C38 100.9(5) . . ?
C26 P5 C38 104.6(6) . . ?
C47 P5 U1 76.3(4) . . ?
C26 P5 U1 123.2(4) . . ?
C38 P5 U1 131.4(4) . . ?
C17 Co2 C39 112.0(5) . . ?
C17 Co2 C43 113.0(5) . . ?
C39 Co2 C43 105.9(6) . . ?
C17 Co2 C50 109.1(6) . . ?
C39 Co2 C50 108.9(6) . . ?
C43 Co2 C50 107.9(6) . . ?
N203 U1 N202 109.5(3) . . ?
N203 U1 N13 104.8(3) . . ?
N202 U1 N13 100.0(3) . . ?
N203 U1 O6 108.8(3) . . ?
N202 U1 O6 111.4(3) . . ?
N13 U1 O6 121.6(3) . . ?
N203 U1 N201 65.9(4) . . ?
N202 U1 N201 67.3(3) . . ?
N13 U1 N201 65.4(3) . . ?
O6 U1 N201 172.7(2) . . ?
N203 U1 P4 54.2(3) . . ?
N202 U1 P4 163.2(2) . . ?
N13 U1 P4 89.7(2) . . ?
O6 U1 P4 74.0(2) . . ?
N201 U1 P4 105.1(3) . . ?
N203 U1 P3 93.8(2) . . ?
N202 U1 P3 53.5(3) . . ?
N13 U1 P3 152.1(2) . . ?
O6 U1 P3 69.4(2) . . ?
N201 U1 P3 105.4(2) . . ?
P4 U1 P3 118.21(9) . . ?
N203 U1 P5 152.3(2) . . ?
N202 U1 P5 93.9(2) . . ?
N13 U1 P5 55.2(3) . . ?
O6 U1 P5 74.2(2) . . ?
N201 U1 P5 112.9(2) . . ?
P4 U1 P5 102.98(9) . . ?
P3 U1 P5 112.28(9) . . ?
 
_diffrn_measured_fraction_theta_max    0.992
_diffrn_reflns_theta_full              25.00
_diffrn_measured_fraction_theta_full   0.995
_refine_diff_density_max    2.945
_refine_diff_density_min   -1.435
_refine_diff_density_rms    0.165


# ------ Material relevant to the Complex 6 ------ 
 
data_shelxl
 
_audit_creation_method            SHELXL-97
_chemical_name_systematic
;
 ?
;
_chemical_name_common             ‘Complex 6’
_chemical_melting_point           ?
_chemical_formula_moiety          ?
_chemical_formula_sum
  'C42 H60 Co N4 O3 P3 Th'
_chemical_formula_weight           1052.82
 
loop_
 _atom_type_symbol
 _atom_type_description
 _atom_type_scat_dispersion_real
 _atom_type_scat_dispersion_imag
 _atom_type_scat_source
 'C'  'C'   0.0033   0.0016
 'International Tables Vol C Tables 4.2.6.8 and 6.1.1.4'
 'H'  'H'   0.0000   0.0000
 'International Tables Vol C Tables 4.2.6.8 and 6.1.1.4'
 'N'  'N'   0.0061   0.0033
 'International Tables Vol C Tables 4.2.6.8 and 6.1.1.4'
 'O'  'O'   0.0106   0.0060
 'International Tables Vol C Tables 4.2.6.8 and 6.1.1.4'
 'P'  'P'   0.1023   0.0942
 'International Tables Vol C Tables 4.2.6.8 and 6.1.1.4'
 'Co'  'Co'   0.3494   0.9721
 'International Tables Vol C Tables 4.2.6.8 and 6.1.1.4'
 'Th'  'Th'  -7.2400   8.8979
 'International Tables Vol C Tables 4.2.6.8 and 6.1.1.4'
 
_symmetry_cell_setting            Triclinic
_symmetry_space_group_name_H-M    P-1
 
loop_
 _symmetry_equiv_pos_as_xyz
 'x, y, z'
 '-x, -y, -z'
 
_cell_length_a                    11.0757(7)
_cell_length_b                    14.0911(8)
_cell_length_c                    18.7140(11)
_cell_angle_alpha                 80.318(2)
_cell_angle_beta                  74.876(2)
_cell_angle_gamma                 89.511(3)
_cell_volume                      2777.4(3)
_cell_formula_units_Z             2
_cell_measurement_temperature     100(2)
_cell_measurement_reflns_used     9037
_cell_measurement_theta_min       2.45
_cell_measurement_theta_max       25.34
 
_exptl_crystal_description        block
_exptl_crystal_colour             'pale blue'
_exptl_crystal_size_max           0.07
_exptl_crystal_size_mid           0.06
_exptl_crystal_size_min           0.06
_exptl_crystal_density_meas       a
_exptl_crystal_density_diffrn     1.259
_exptl_crystal_density_method     'not measured'
_exptl_crystal_F_000              1052
_exptl_absorpt_coefficient_mu     3.092
_exptl_absorpt_correction_type    multi-scan
_exptl_absorpt_correction_T_min   0.8127
_exptl_absorpt_correction_T_max   0.8362
_exptl_absorpt_process_details    SADABS
 
_exptl_special_details
;
 ?
;
 
_diffrn_ambient_temperature       100(2)
_diffrn_radiation_wavelength      0.71073
_diffrn_radiation_type            MoK\a
_diffrn_radiation_source          'fine-focus sealed tube'
_diffrn_radiation_monochromator   'QUAZAR multilayer mirrors'
_diffrn_measurement_device_type   'Bruker APEX-II CCD'
_diffrn_measurement_method        '\f and \w scans'
_diffrn_detector_area_resol_mean  8.366
_diffrn_reflns_number             52419
_diffrn_reflns_av_R_equivalents   0.0312
_diffrn_reflns_av_sigmaI/netI     0.0323
_diffrn_reflns_limit_h_min        -12
_diffrn_reflns_limit_h_max        13
_diffrn_reflns_limit_k_min        -16
_diffrn_reflns_limit_k_max        17
_diffrn_reflns_limit_l_min        -22
_diffrn_reflns_limit_l_max        22
_diffrn_reflns_theta_min          1.47
_diffrn_reflns_theta_max          25.40
_reflns_number_total              10197
_reflns_number_gt                 9147
_reflns_threshold_expression      >2sigma(I)
 
_computing_data_collection        'Bruker APEX2'
_computing_cell_refinement        'Bruker SAINT'
_computing_data_reduction         'Bruker SAINT'
_computing_structure_solution     'SHELXS-97 (Sheldrick, 2008)'
_computing_structure_refinement   'SHELXL-97 (Sheldrick, 2008)'
_computing_molecular_graphics     'ORTEP-32'
_computing_publication_material   'WinGX'
 
_refine_special_details
;
 Refinement of F^2^ against ALL reflections.  The weighted R-factor wR and
 goodness of fit S are based on F^2^, conventional R-factors R are based
 on F, with F set to zero for negative F^2^. The threshold expression of
 F^2^ > 2sigma(F^2^) is used only for calculating R-factors(gt) etc. and is
 not relevant to the choice of reflections for refinement.  R-factors based
 on F^2^ are statistically about twice as large as those based on F, and R-
 factors based on ALL data will be even larger.
;
 
_refine_ls_structure_factor_coef  Fsqd
_refine_ls_matrix_type            full
_refine_ls_weighting_scheme       calc
_refine_ls_weighting_details
 'calc w=1/[\s^2^(Fo^2^)+(0.0412P)^2^+2.7930P] where P=(Fo^2^+2Fc^2^)/3'
_atom_sites_solution_primary      direct
_atom_sites_solution_secondary    difmap
_atom_sites_solution_hydrogens    geom
_refine_ls_hydrogen_treatment     constr
_refine_ls_extinction_method      none
_refine_ls_extinction_coef        ?
_refine_ls_number_reflns          10197
_refine_ls_number_parameters      499
_refine_ls_number_restraints      0
_refine_ls_R_factor_all           0.0357
_refine_ls_R_factor_gt            0.0304
_refine_ls_wR_factor_ref          0.0736
_refine_ls_wR_factor_gt           0.0716
_refine_ls_goodness_of_fit_ref    1.039
_refine_ls_restrained_S_all       1.039
_refine_ls_shift/su_max           0.004
_refine_ls_shift/su_mean          0.000
 
loop_
 _atom_site_label
 _atom_site_type_symbol
 _atom_site_fract_x
 _atom_site_fract_y
 _atom_site_fract_z
 _atom_site_U_iso_or_equiv
 _atom_site_adp_type
 _atom_site_occupancy
 _atom_site_symmetry_multiplicity
 _atom_site_calc_flag
 _atom_site_refinement_flags
 _atom_site_disorder_assembly
 _atom_site_disorder_group
C1 C 0.1200(4) 0.2991(3) 0.6164(3) 0.0357(10) Uani 1 1 d . . .
H1 H 0.0371 0.2837 0.6467 0.043 Uiso 1 1 calc R . .
C2 C 0.3393(3) 0.3241(2) 0.6029(2) 0.0206(8) Uani 1 1 d . . .
C3 C 0.3606(3) 0.3458(2) 0.5263(2) 0.0221(8) Uani 1 1 d . . .
H3 H 0.4431 0.3614 0.4953 0.027 Uiso 1 1 calc R . .
C4 C 0.2606(4) 0.3447(3) 0.4944(2) 0.0321(10) Uani 1 1 d . . .
H4 H 0.2749 0.3587 0.4413 0.039 Uiso 1 1 calc R . .
C5 C 0.1417(4) 0.3236(3) 0.5392(3) 0.0364(10) Uani 1 1 d . . .
H5 H 0.0734 0.3258 0.5171 0.044 Uiso 1 1 calc R . .
C6 C 0.0899(4) 0.2692(3) 0.7807(3) 0.0425(11) Uani 1 1 d . . .
H6A H 0.0362 0.2127 0.7823 0.051 Uiso 1 1 calc R . .
H6B H 0.0455 0.3289 0.7696 0.051 Uiso 1 1 calc R . .
C7 C 0.0046(5) 0.2045(5) 0.9450(3) 0.077(2) Uani 1 1 d . . .
H7 H -0.0716 0.2426 0.9437 0.092 Uiso 1 1 calc R . .
C8 C 0.0337(8) 0.2053(10) 1.0199(4) 0.182(6) Uani 1 1 d . . .
H8A H -0.0333 0.1702 1.0606 0.272 Uiso 1 1 calc R . .
H8B H 0.0400 0.2720 1.0276 0.272 Uiso 1 1 calc R . .
H8C H 0.1133 0.1743 1.0199 0.272 Uiso 1 1 calc R . .
C9 C -0.0205(5) 0.1049(4) 0.9339(3) 0.0637(16) Uani 1 1 d . . .
H9A H 0.0550 0.0676 0.9321 0.095 Uiso 1 1 calc R . .
H9B H -0.0440 0.1078 0.8866 0.095 Uiso 1 1 calc R . .
H9C H -0.0890 0.0739 0.9757 0.095 Uiso 1 1 calc R . .
C10 C 0.2189(3) 0.2969(2) 0.6502(2) 0.0265(9) Uani 1 1 d . . .
C11 C 0.1368(5) 0.3957(5) 0.8718(5) 0.095(3) Uani 1 1 d . . .
H11 H 0.1728 0.4275 0.8185 0.113 Uiso 1 1 calc R . .
C12 C 0.0066(6) 0.4345(5) 0.8939(5) 0.122(4) Uani 1 1 d . . .
H12A H -0.0340 0.4076 0.9464 0.182 Uiso 1 1 calc R . .
H12B H -0.0430 0.4162 0.8616 0.182 Uiso 1 1 calc R . .
H12C H 0.0127 0.5049 0.8878 0.182 Uiso 1 1 calc R . .
C13 C 0.2158(7) 0.4260(5) 0.9112(6) 0.115(3) Uani 1 1 d . . .
H13A H 0.2236 0.4965 0.9013 0.172 Uiso 1 1 calc R . .
H13B H 0.2985 0.3993 0.8949 0.172 Uiso 1 1 calc R . .
H13C H 0.1807 0.4034 0.9652 0.172 Uiso 1 1 calc R . .
C14 C 0.4339(3) 0.4197(2) 0.6733(2) 0.0225(8) Uani 1 1 d . . .
C15 C 0.3966(3) 0.5052(3) 0.6407(2) 0.0257(8) Uani 1 1 d . . .
H15 H 0.3646 0.5078 0.5980 0.031 Uiso 1 1 calc R . .
C16 C 0.4056(4) 0.5884(3) 0.6702(2) 0.0370(10) Uani 1 1 d . . .
H16 H 0.3790 0.6479 0.6482 0.044 Uiso 1 1 calc R . .
C17 C 0.4536(5) 0.5835(3) 0.7315(3) 0.0494(13) Uani 1 1 d . . .
H17 H 0.4630 0.6405 0.7506 0.059 Uiso 1 1 calc R . .
C18 C 0.4882(5) 0.4974(3) 0.7653(3) 0.0459(12) Uani 1 1 d . . .
H18 H 0.5202 0.4954 0.8079 0.055 Uiso 1 1 calc R . .
C19 C 0.4769(4) 0.4125(3) 0.7379(2) 0.0263(8) Uani 1 1 d . . .
C20 C 0.5633(4) 0.3135(3) 0.8326(2) 0.0332(10) Uani 1 1 d . . .
H20A H 0.5192 0.3473 0.8737 0.040 Uiso 1 1 calc R . .
H20B H 0.6505 0.3396 0.8125 0.040 Uiso 1 1 calc R . .
C21 C 0.7197(4) 0.1446(3) 0.8304(2) 0.0302(9) Uani 1 1 d . . .
H21 H 0.7751 0.1796 0.8526 0.036 Uiso 1 1 calc R . .
C22 C 0.7634(4) 0.1708(3) 0.7451(2) 0.0367(10) Uani 1 1 d . . .
H22A H 0.8504 0.1526 0.7278 0.055 Uiso 1 1 calc R . .
H22B H 0.7576 0.2404 0.7300 0.055 Uiso 1 1 calc R . .
H22C H 0.7103 0.1364 0.7227 0.055 Uiso 1 1 calc R . .
C23 C 0.7258(4) 0.0363(3) 0.8571(2) 0.0349(10) Uani 1 1 d . . .
H23A H 0.6622 0.0018 0.8424 0.052 Uiso 1 1 calc R . .
H23B H 0.7101 0.0232 0.9119 0.052 Uiso 1 1 calc R . .
H23C H 0.8089 0.0145 0.8340 0.052 Uiso 1 1 calc R . .
C24 C 0.5272(4) 0.1640(3) 0.9673(2) 0.0350(10) Uani 1 1 d . . .
H24 H 0.5230 0.0929 0.9859 0.042 Uiso 1 1 calc R . .
C25 C 0.4001(5) 0.2023(3) 1.0020(2) 0.0456(12) Uani 1 1 d . . .
H25A H 0.3801 0.1846 1.0568 0.068 Uiso 1 1 calc R . .
H25B H 0.3359 0.1743 0.9835 0.068 Uiso 1 1 calc R . .
H25C H 0.4027 0.2726 0.9879 0.068 Uiso 1 1 calc R . .
C26 C 0.6305(5) 0.2072(3) 0.9937(2) 0.0445(11) Uani 1 1 d . . .
H26A H 0.6434 0.2758 0.9720 0.067 Uiso 1 1 calc R . .
H26B H 0.7083 0.1739 0.9773 0.067 Uiso 1 1 calc R . .
H26C H 0.6061 0.1995 1.0486 0.067 Uiso 1 1 calc R . .
C27 C 0.5645(3) 0.3167(2) 0.59653(19) 0.0196(8) Uani 1 1 d . . .
C28 C 0.6420(4) 0.3923(3) 0.5529(2) 0.0268(9) Uani 1 1 d . . .
H28 H 0.6142 0.4564 0.5524 0.032 Uiso 1 1 calc R . .
C29 C 0.7973(3) 0.2825(3) 0.5097(2) 0.0276(9) Uani 1 1 d . . .
H29 H 0.8764 0.2704 0.4783 0.033 Uiso 1 1 calc R . .
C30 C 0.7600(4) 0.3761(3) 0.5097(2) 0.0314(9) Uani 1 1 d . . .
H30 H 0.8142 0.4285 0.4806 0.038 Uiso 1 1 calc R . .
C31 C 0.7223(3) 0.2062(3) 0.5543(2) 0.0235(8) Uani 1 1 d . . .
H31 H 0.7512 0.1425 0.5541 0.028 Uiso 1 1 calc R . .
C32 C 0.6040(3) 0.2210(2) 0.59989(19) 0.0193(8) Uani 1 1 d . . .
C33 C 0.5581(3) 0.0509(2) 0.6405(2) 0.0226(8) Uani 1 1 d . . .
H33A H 0.6303 0.0339 0.6615 0.027 Uiso 1 1 calc R . .
H33B H 0.5839 0.0472 0.5863 0.027 Uiso 1 1 calc R . .
C34 C 0.5103(4) -0.1496(3) 0.6989(2) 0.0276(9) Uani 1 1 d . . .
H34 H 0.4445 -0.2027 0.7155 0.033 Uiso 1 1 calc R . .
C35 C 0.5749(4) -0.1544(3) 0.7620(2) 0.0371(10) Uani 1 1 d . . .
H35A H 0.6048 -0.2194 0.7733 0.056 Uiso 1 1 calc R . .
H35B H 0.5153 -0.1390 0.8070 0.056 Uiso 1 1 calc R . .
H35C H 0.6459 -0.1078 0.7464 0.056 Uiso 1 1 calc R . .
C36 C 0.6004(4) -0.1714(3) 0.6267(2) 0.0364(10) Uani 1 1 d . . .
H36A H 0.6656 -0.1201 0.6072 0.055 Uiso 1 1 calc R . .
H36B H 0.5542 -0.1751 0.5891 0.055 Uiso 1 1 calc R . .
H36C H 0.6392 -0.2331 0.6376 0.055 Uiso 1 1 calc R . .
C37 C 0.3586(4) -0.0448(3) 0.6083(2) 0.0272(8) Uani 1 1 d . . .
H37 H 0.4269 -0.0635 0.5670 0.033 Uiso 1 1 calc R . .
C38 C 0.2556(4) -0.1232(3) 0.6299(2) 0.0367(10) Uani 1 1 d . . .
H38A H 0.1884 -0.1084 0.6718 0.055 Uiso 1 1 calc R . .
H38B H 0.2899 -0.1854 0.6451 0.055 Uiso 1 1 calc R . .
H38C H 0.2221 -0.1264 0.5867 0.055 Uiso 1 1 calc R . .
C39 C 0.3130(4) 0.0523(3) 0.5780(2) 0.0324(9) Uani 1 1 d . . .
H39A H 0.2771 0.0455 0.5364 0.049 Uiso 1 1 calc R . .
H39B H 0.3836 0.0994 0.5600 0.049 Uiso 1 1 calc R . .
H39C H 0.2490 0.0745 0.6181 0.049 Uiso 1 1 calc R . .
C40 C 0.2493(4) -0.1460(3) 0.8210(2) 0.0388(10) Uani 1 1 d . . .
C41 C 0.1531(4) 0.0281(3) 0.7693(2) 0.0338(10) Uani 1 1 d . . .
C42 C 0.3191(4) 0.0047(3) 0.8744(2) 0.0290(9) Uani 1 1 d . . .
N1 N 0.4379(3) 0.33095(19) 0.64148(15) 0.0182(6) Uani 1 1 d . . .
N2 N 0.4973(3) 0.3208(2) 0.77313(17) 0.0290(8) Uani 1 1 d . . .
N3 N 0.2112(3) 0.2688(2) 0.72633(19) 0.0309(8) Uani 1 1 d . . .
N4 N 0.5231(3) 0.14937(19) 0.64987(16) 0.0192(6) Uani 1 1 d . . .
O1 O 0.3273(3) 0.0117(2) 0.93409(15) 0.0408(7) Uani 1 1 d . . .
O2 O 0.0583(3) 0.0499(2) 0.75582(18) 0.0473(8) Uani 1 1 d . . .
O3 O 0.2272(4) -0.2274(2) 0.8396(2) 0.0598(10) Uani 1 1 d . . .
P1 P 0.55758(10) 0.18180(7) 0.86412(5) 0.0276(2) Uani 1 1 d . . .
P2 P 0.13697(11) 0.26332(10) 0.86858(7) 0.0489(3) Uani 1 1 d . . .
P3 P 0.42678(9) -0.03581(6) 0.68813(5) 0.0214(2) Uani 1 1 d . . .
Co2 Co 0.28573(5) -0.02072(3) 0.79346(3) 0.02521(12) Uani 1 1 d . . .
Th1 Th 0.381449(13) 0.190881(9) 0.755891(7) 0.02158(6) Uani 1 1 d . . .
 
loop_
 _atom_site_aniso_label
 _atom_site_aniso_U_11
 _atom_site_aniso_U_22
 _atom_site_aniso_U_33
 _atom_site_aniso_U_23
 _atom_site_aniso_U_13
 _atom_site_aniso_U_12
C1 0.018(2) 0.014(2) 0.069(3) -0.001(2) -0.004(2) -0.0016(16)
C2 0.022(2) 0.0058(17) 0.034(2) -0.0038(15) -0.0088(16) 0.0027(14)
C3 0.025(2) 0.0103(18) 0.031(2) -0.0027(15) -0.0091(16) 0.0030(14)
C4 0.041(3) 0.018(2) 0.045(2) -0.0111(18) -0.022(2) 0.0070(18)
C5 0.037(3) 0.016(2) 0.064(3) -0.005(2) -0.028(2) 0.0016(17)
C6 0.033(2) 0.028(2) 0.052(3) -0.003(2) 0.010(2) 0.0067(19)
C7 0.042(3) 0.131(6) 0.047(3) -0.037(4) 0.020(3) -0.032(3)
C8 0.107(6) 0.378(17) 0.043(4) -0.069(7) 0.034(4) -0.124(9)
C9 0.047(3) 0.082(4) 0.044(3) 0.019(3) 0.002(2) -0.010(3)
C10 0.027(2) 0.0077(18) 0.039(2) 0.0017(16) -0.0019(18) 0.0006(15)
C11 0.051(4) 0.069(4) 0.177(8) -0.084(5) -0.014(4) 0.013(3)
C12 0.053(4) 0.098(6) 0.225(10) -0.114(7) -0.001(5) 0.012(4)
C13 0.074(5) 0.080(5) 0.210(10) -0.075(6) -0.042(6) 0.008(4)
C14 0.027(2) 0.0124(18) 0.0253(19) -0.0019(15) -0.0031(16) -0.0008(15)
C15 0.032(2) 0.0155(19) 0.028(2) 0.0006(16) -0.0074(17) 0.0021(16)
C16 0.054(3) 0.014(2) 0.044(3) -0.0023(18) -0.016(2) 0.0064(18)
C17 0.094(4) 0.015(2) 0.048(3) -0.011(2) -0.031(3) 0.003(2)
C18 0.084(4) 0.020(2) 0.043(3) -0.0069(19) -0.034(3) 0.001(2)
C19 0.035(2) 0.0111(19) 0.032(2) -0.0012(16) -0.0086(17) 0.0004(16)
C20 0.056(3) 0.020(2) 0.028(2) -0.0030(17) -0.019(2) 0.0045(19)
C21 0.041(2) 0.026(2) 0.028(2) -0.0025(17) -0.0163(18) -0.0011(18)
C22 0.044(3) 0.037(3) 0.030(2) -0.0016(19) -0.0132(19) 0.001(2)
C23 0.046(3) 0.025(2) 0.036(2) -0.0046(18) -0.017(2) 0.0046(19)
C24 0.053(3) 0.029(2) 0.022(2) 0.0004(17) -0.0104(19) 0.002(2)
C25 0.062(3) 0.044(3) 0.029(2) -0.006(2) -0.009(2) 0.005(2)
C26 0.068(3) 0.042(3) 0.026(2) -0.005(2) -0.018(2) 0.002(2)
C27 0.024(2) 0.0164(18) 0.0213(18) -0.0027(15) -0.0113(15) 0.0028(15)
C28 0.029(2) 0.0162(19) 0.036(2) 0.0011(16) -0.0120(18) 0.0002(16)
C29 0.018(2) 0.030(2) 0.034(2) -0.0051(18) -0.0067(17) 0.0013(16)
C30 0.023(2) 0.024(2) 0.043(2) 0.0034(18) -0.0075(18) -0.0017(17)
C31 0.028(2) 0.0170(19) 0.0265(19) -0.0024(15) -0.0100(17) 0.0040(16)
C32 0.027(2) 0.0138(18) 0.0190(17) -0.0013(14) -0.0113(15) 0.0030(15)
C33 0.029(2) 0.0102(18) 0.0268(19) -0.0023(15) -0.0045(16) 0.0058(15)
C34 0.041(2) 0.0094(18) 0.030(2) -0.0021(15) -0.0056(18) 0.0017(16)
C35 0.049(3) 0.023(2) 0.041(2) -0.0042(19) -0.015(2) 0.0120(19)
C36 0.045(3) 0.022(2) 0.040(2) -0.0071(18) -0.006(2) 0.0119(19)
C37 0.033(2) 0.023(2) 0.026(2) -0.0087(16) -0.0058(17) 0.0018(17)
C38 0.047(3) 0.029(2) 0.038(2) -0.0127(19) -0.016(2) -0.0021(19)
C39 0.042(3) 0.030(2) 0.028(2) -0.0047(17) -0.0147(19) 0.0056(18)
C40 0.050(3) 0.027(3) 0.032(2) -0.0028(19) 0.001(2) -0.003(2)
C41 0.041(3) 0.025(2) 0.031(2) -0.0087(18) 0.0003(19) 0.0032(19)
C42 0.041(2) 0.0128(19) 0.028(2) 0.0019(16) -0.0039(18) -0.0006(16)
N1 0.0237(16) 0.0101(14) 0.0197(15) -0.0013(12) -0.0049(12) 0.0014(12)
N2 0.053(2) 0.0146(16) 0.0239(16) -0.0022(13) -0.0197(16) 0.0034(15)
N3 0.0248(18) 0.0175(17) 0.0385(19) 0.0024(14) 0.0081(15) 0.0030(13)
N4 0.0257(17) 0.0087(14) 0.0232(15) -0.0016(12) -0.0071(13) 0.0011(12)
O1 0.064(2) 0.0333(17) 0.0227(15) 0.0028(12) -0.0121(14) -0.0075(14)
O2 0.044(2) 0.048(2) 0.055(2) -0.0174(16) -0.0165(16) 0.0125(16)
O3 0.086(3) 0.0183(18) 0.060(2) -0.0005(15) 0.0027(19) -0.0117(16)
P1 0.0441(6) 0.0180(5) 0.0211(5) -0.0003(4) -0.0110(4) 0.0017(4)
P2 0.0353(7) 0.0517(8) 0.0523(8) -0.0292(6) 0.0148(6) -0.0097(6)
P3 0.0299(5) 0.0120(5) 0.0214(5) -0.0032(4) -0.0049(4) 0.0018(4)
Co2 0.0340(3) 0.0156(3) 0.0232(3) -0.0025(2) -0.0031(2) 0.0006(2)
Th1 0.03238(9) 0.01068(8) 0.01891(8) -0.00058(5) -0.00314(6) 0.00106(5)
 
_geom_special_details
;
 All esds (except the esd in the dihedral angle between two l.s. planes)
 are estimated using the full covariance matrix.  The cell esds are taken
 into account individually in the estimation of esds in distances, angles
 and torsion angles; correlations between esds in cell parameters are only
 used when they are defined by crystal symmetry.  An approximate (isotropic)
 treatment of cell esds is used for estimating esds involving l.s. planes.
;
 
loop_
 _geom_bond_atom_site_label_1
 _geom_bond_atom_site_label_2
 _geom_bond_distance
 _geom_bond_site_symmetry_2
 _geom_bond_publ_flag
C1 C5 1.386(6) . ?
C1 C10 1.397(6) . ?
C1 H1 0.9500 . ?
C2 C3 1.372(5) . ?
C2 C10 1.409(5) . ?
C2 N1 1.470(4) . ?
C3 C4 1.390(5) . ?
C3 H3 0.9500 . ?
C4 C5 1.368(6) . ?
C4 H4 0.9500 . ?
C5 H5 0.9500 . ?
C6 N3 1.459(5) . ?
C6 P2 1.840(5) . ?
C6 H6A 0.9900 . ?
C6 H6B 0.9900 . ?
C7 C9 1.491(8) . ?
C7 C8 1.522(9) . ?
C7 P2 1.846(5) . ?
C7 H7 1.0000 . ?
C8 H8A 0.9800 . ?
C8 H8B 0.9800 . ?
C8 H8C 0.9800 . ?
C9 H9A 0.9800 . ?
C9 H9B 0.9800 . ?
C9 H9C 0.9800 . ?
C10 N3 1.394(5) . ?
C11 C13 1.393(9) . ?
C11 C12 1.517(8) . ?
C11 P2 1.876(6) . ?
C11 H11 1.0000 . ?
C12 H12A 0.9800 . ?
C12 H12B 0.9800 . ?
C12 H12C 0.9800 . ?
C13 H13A 0.9800 . ?
C13 H13B 0.9800 . ?
C13 H13C 0.9800 . ?
C14 C15 1.369(5) . ?
C14 C19 1.398(5) . ?
C14 N1 1.469(4) . ?
C15 C16 1.391(5) . ?
C15 H15 0.9500 . ?
C16 C17 1.377(6) . ?
C16 H16 0.9500 . ?
C17 C18 1.371(6) . ?
C17 H17 0.9500 . ?
C18 C19 1.397(5) . ?
C18 H18 0.9500 . ?
C19 N2 1.393(5) . ?
C20 N2 1.472(5) . ?
C20 P1 1.847(4) . ?
C20 H20A 0.9900 . ?
C20 H20B 0.9900 . ?
C21 C22 1.523(5) . ?
C21 C23 1.530(5) . ?
C21 P1 1.844(4) . ?
C21 H21 1.0000 . ?
C22 H22A 0.9800 . ?
C22 H22B 0.9800 . ?
C22 H22C 0.9800 . ?
C23 H23A 0.9800 . ?
C23 H23B 0.9800 . ?
C23 H23C 0.9800 . ?
C24 C25 1.524(6) . ?
C24 C26 1.526(6) . ?
C24 P1 1.845(4) . ?
C24 H24 1.0000 . ?
C25 H25A 0.9800 . ?
C25 H25B 0.9800 . ?
C25 H25C 0.9800 . ?
C26 H26A 0.9800 . ?
C26 H26B 0.9800 . ?
C26 H26C 0.9800 . ?
C27 C28 1.377(5) . ?
C27 C32 1.410(5) . ?
C27 N1 1.467(4) . ?
C28 C30 1.386(5) . ?
C28 H28 0.9500 . ?
C29 C30 1.379(5) . ?
C29 C31 1.376(5) . ?
C29 H29 0.9500 . ?
C30 H30 0.9500 . ?
C31 C32 1.400(5) . ?
C31 H31 0.9500 . ?
C32 N4 1.399(5) . ?
C33 N4 1.464(4) . ?
C33 P3 1.842(4) . ?
C33 H33A 0.9900 . ?
C33 H33B 0.9900 . ?
C34 C35 1.525(6) . ?
C34 C36 1.532(5) . ?
C34 P3 1.853(4) . ?
C34 H34 1.0000 . ?
C35 H35A 0.9800 . ?
C35 H35B 0.9800 . ?
C35 H35C 0.9800 . ?
C36 H36A 0.9800 . ?
C36 H36B 0.9800 . ?
C36 H36C 0.9800 . ?
C37 C38 1.521(5) . ?
C37 C39 1.526(5) . ?
C37 P3 1.864(4) . ?
C37 H37 1.0000 . ?
C38 H38A 0.9800 . ?
C38 H38B 0.9800 . ?
C38 H38C 0.9800 . ?
C39 H39A 0.9800 . ?
C39 H39B 0.9800 . ?
C39 H39C 0.9800 . ?
C40 O3 1.149(5) . ?
C40 Co2 1.773(4) . ?
C41 O2 1.170(5) . ?
C41 Co2 1.749(5) . ?
C42 O1 1.164(5) . ?
C42 Co2 1.743(4) . ?
C42 Th1 3.091(4) . ?
N1 Th1 2.602(3) . ?
N2 Th1 2.358(3) . ?
N3 Th1 2.318(3) . ?
N4 Th1 2.343(3) . ?
P1 Th1 3.1455(10) . ?
P2 Th1 3.2432(11) . ?
P3 Co2 2.2135(10) . ?
Co2 Th1 3.0771(5) . ?
 
loop_
 _geom_angle_atom_site_label_1
 _geom_angle_atom_site_label_2
 _geom_angle_atom_site_label_3
 _geom_angle
 _geom_angle_site_symmetry_1
 _geom_angle_site_symmetry_3
 _geom_angle_publ_flag
C5 C1 C10 120.7(4) . . ?
C5 C1 H1 119.7 . . ?
C10 C1 H1 119.7 . . ?
C3 C2 C10 121.6(3) . . ?
C3 C2 N1 122.9(3) . . ?
C10 C2 N1 115.5(3) . . ?
C2 C3 C4 119.4(4) . . ?
C2 C3 H3 120.3 . . ?
C4 C3 H3 120.3 . . ?
C5 C4 C3 120.2(4) . . ?
C5 C4 H4 119.9 . . ?
C3 C4 H4 119.9 . . ?
C4 C5 C1 120.6(4) . . ?
C4 C5 H5 119.7 . . ?
C1 C5 H5 119.7 . . ?
N3 C6 P2 101.2(3) . . ?
N3 C6 H6A 111.5 . . ?
P2 C6 H6A 111.5 . . ?
N3 C6 H6B 111.5 . . ?
P2 C6 H6B 111.5 . . ?
H6A C6 H6B 109.3 . . ?
C9 C7 C8 112.0(7) . . ?
C9 C7 P2 110.4(4) . . ?
C8 C7 P2 108.9(4) . . ?
C9 C7 H7 108.5 . . ?
C8 C7 H7 108.5 . . ?
P2 C7 H7 108.5 . . ?
C7 C8 H8A 109.5 . . ?
C7 C8 H8B 109.5 . . ?
H8A C8 H8B 109.5 . . ?
C7 C8 H8C 109.5 . . ?
H8A C8 H8C 109.5 . . ?
H8B C8 H8C 109.5 . . ?
C7 C9 H9A 109.5 . . ?
C7 C9 H9B 109.5 . . ?
H9A C9 H9B 109.5 . . ?
C7 C9 H9C 109.5 . . ?
H9A C9 H9C 109.5 . . ?
H9B C9 H9C 109.5 . . ?
N3 C10 C1 126.6(4) . . ?
N3 C10 C2 116.1(3) . . ?
C1 C10 C2 117.3(4) . . ?
C13 C11 C12 112.5(6) . . ?
C13 C11 P2 114.9(6) . . ?
C12 C11 P2 113.6(4) . . ?
C13 C11 H11 104.9 . . ?
C12 C11 H11 104.9 . . ?
P2 C11 H11 104.9 . . ?
C11 C12 H12A 109.5 . . ?
C11 C12 H12B 109.5 . . ?
H12A C12 H12B 109.5 . . ?
C11 C12 H12C 109.5 . . ?
H12A C12 H12C 109.5 . . ?
H12B C12 H12C 109.5 . . ?
C11 C13 H13A 109.5 . . ?
C11 C13 H13B 109.5 . . ?
H13A C13 H13B 109.5 . . ?
C11 C13 H13C 109.5 . . ?
H13A C13 H13C 109.5 . . ?
H13B C13 H13C 109.5 . . ?
C15 C14 C19 121.7(3) . . ?
C15 C14 N1 122.9(3) . . ?
C19 C14 N1 115.4(3) . . ?
C14 C15 C16 119.8(4) . . ?
C14 C15 H15 120.1 . . ?
C16 C15 H15 120.1 . . ?
C17 C16 C15 119.3(4) . . ?
C17 C16 H16 120.3 . . ?
C15 C16 H16 120.3 . . ?
C18 C17 C16 120.9(4) . . ?
C18 C17 H17 119.5 . . ?
C16 C17 H17 119.5 . . ?
C17 C18 C19 120.8(4) . . ?
C17 C18 H18 119.6 . . ?
C19 C18 H18 119.6 . . ?
N2 C19 C14 117.9(3) . . ?
N2 C19 C18 124.6(3) . . ?
C14 C19 C18 117.4(3) . . ?
N2 C20 P1 101.2(2) . . ?
N2 C20 H20A 111.5 . . ?
P1 C20 H20A 111.5 . . ?
N2 C20 H20B 111.5 . . ?
P1 C20 H20B 111.5 . . ?
H20A C20 H20B 109.4 . . ?
C22 C21 C23 111.6(3) . . ?
C22 C21 P1 110.0(3) . . ?
C23 C21 P1 109.1(3) . . ?
C22 C21 H21 108.7 . . ?
C23 C21 H21 108.7 . . ?
P1 C21 H21 108.7 . . ?
C21 C22 H22A 109.5 . . ?
C21 C22 H22B 109.5 . . ?
H22A C22 H22B 109.5 . . ?
C21 C22 H22C 109.5 . . ?
H22A C22 H22C 109.5 . . ?
H22B C22 H22C 109.5 . . ?
C21 C23 H23A 109.5 . . ?
C21 C23 H23B 109.5 . . ?
H23A C23 H23B 109.5 . . ?
C21 C23 H23C 109.5 . . ?
H23A C23 H23C 109.5 . . ?
H23B C23 H23C 109.5 . . ?
C25 C24 C26 111.2(4) . . ?
C25 C24 P1 110.3(3) . . ?
C26 C24 P1 113.4(3) . . ?
C25 C24 H24 107.2 . . ?
C26 C24 H24 107.2 . . ?
P1 C24 H24 107.2 . . ?
C24 C25 H25A 109.5 . . ?
C24 C25 H25B 109.5 . . ?
H25A C25 H25B 109.5 . . ?
C24 C25 H25C 109.5 . . ?
H25A C25 H25C 109.5 . . ?
H25B C25 H25C 109.5 . . ?
C24 C26 H26A 109.5 . . ?
C24 C26 H26B 109.5 . . ?
H26A C26 H26B 109.5 . . ?
C24 C26 H26C 109.5 . . ?
H26A C26 H26C 109.5 . . ?
H26B C26 H26C 109.5 . . ?
C28 C27 C32 121.0(3) . . ?
C28 C27 N1 122.2(3) . . ?
C32 C27 N1 116.8(3) . . ?
C27 C28 C30 120.7(3) . . ?
C27 C28 H28 119.6 . . ?
C30 C28 H28 119.6 . . ?
C30 C29 C31 121.3(4) . . ?
C30 C29 H29 119.4 . . ?
C31 C29 H29 119.4 . . ?
C29 C30 C28 118.7(4) . . ?
C29 C30 H30 120.7 . . ?
C28 C30 H30 120.7 . . ?
C29 C31 C32 121.0(3) . . ?
C29 C31 H31 119.5 . . ?
C32 C31 H31 119.5 . . ?
N4 C32 C31 125.6(3) . . ?
N4 C32 C27 117.2(3) . . ?
C31 C32 C27 117.1(3) . . ?
N4 C33 P3 111.2(2) . . ?
N4 C33 H33A 109.4 . . ?
P3 C33 H33A 109.4 . . ?
N4 C33 H33B 109.4 . . ?
P3 C33 H33B 109.4 . . ?
H33A C33 H33B 108.0 . . ?
C35 C34 C36 111.4(3) . . ?
C35 C34 P3 110.7(3) . . ?
C36 C34 P3 115.2(3) . . ?
C35 C34 H34 106.3 . . ?
C36 C34 H34 106.3 . . ?
P3 C34 H34 106.3 . . ?
C34 C35 H35A 109.5 . . ?
C34 C35 H35B 109.5 . . ?
H35A C35 H35B 109.5 . . ?
C34 C35 H35C 109.5 . . ?
H35A C35 H35C 109.5 . . ?
H35B C35 H35C 109.5 . . ?
C34 C36 H36A 109.5 . . ?
C34 C36 H36B 109.5 . . ?
H36A C36 H36B 109.5 . . ?
C34 C36 H36C 109.5 . . ?
H36A C36 H36C 109.5 . . ?
H36B C36 H36C 109.5 . . ?
C38 C37 C39 111.8(3) . . ?
C38 C37 P3 111.5(3) . . ?
C39 C37 P3 111.1(3) . . ?
C38 C37 H37 107.4 . . ?
C39 C37 H37 107.4 . . ?
P3 C37 H37 107.4 . . ?
C37 C38 H38A 109.5 . . ?
C37 C38 H38B 109.5 . . ?
H38A C38 H38B 109.5 . . ?
C37 C38 H38C 109.5 . . ?
H38A C38 H38C 109.5 . . ?
H38B C38 H38C 109.5 . . ?
C37 C39 H39A 109.5 . . ?
C37 C39 H39B 109.5 . . ?
H39A C39 H39B 109.5 . . ?
C37 C39 H39C 109.5 . . ?
H39A C39 H39C 109.5 . . ?
H39B C39 H39C 109.5 . . ?
O3 C40 Co2 178.7(5) . . ?
O2 C41 Co2 172.1(4) . . ?
O1 C42 Co2 169.9(3) . . ?
O1 C42 Th1 115.5(3) . . ?
Co2 C42 Th1 73.16(12) . . ?
C14 N1 C27 110.9(3) . . ?
C14 N1 C2 112.8(3) . . ?
C27 N1 C2 114.4(3) . . ?
C14 N1 Th1 105.79(19) . . ?
C27 N1 Th1 107.94(19) . . ?
C2 N1 Th1 104.24(19) . . ?
C19 N2 C20 118.0(3) . . ?
C19 N2 Th1 117.2(2) . . ?
C20 N2 Th1 123.0(2) . . ?
C10 N3 C6 118.8(3) . . ?
C10 N3 Th1 116.6(2) . . ?
C6 N3 Th1 123.1(3) . . ?
C32 N4 C33 114.3(3) . . ?
C32 N4 Th1 119.0(2) . . ?
C33 N4 Th1 124.8(2) . . ?
C24 P1 C21 104.92(18) . . ?
C24 P1 C20 105.69(18) . . ?
C21 P1 C20 105.18(19) . . ?
C24 P1 Th1 133.04(15) . . ?
C21 P1 Th1 118.23(12) . . ?
C20 P1 Th1 81.07(13) . . ?
C6 P2 C7 106.6(2) . . ?
C6 P2 C11 97.9(3) . . ?
C7 P2 C11 107.9(3) . . ?
C6 P2 Th1 76.86(13) . . ?
C7 P2 Th1 135.6(2) . . ?
C11 P2 Th1 115.5(2) . . ?
C33 P3 C34 101.18(17) . . ?
C33 P3 C37 100.25(17) . . ?
C34 P3 C37 103.19(17) . . ?
C33 P3 Co2 124.33(12) . . ?
C34 P3 Co2 111.41(13) . . ?
C37 P3 Co2 113.83(13) . . ?
C42 Co2 C41 118.59(18) . . ?
C42 Co2 C40 100.03(19) . . ?
C41 Co2 C40 104.8(2) . . ?
C42 Co2 P3 125.26(14) . . ?
C41 Co2 P3 107.74(13) . . ?
C40 Co2 P3 94.50(14) . . ?
C42 Co2 Th1 74.02(12) . . ?
C41 Co2 Th1 83.42(14) . . ?
C40 Co2 Th1 171.63(16) . . ?
P3 Co2 Th1 84.52(3) . . ?
N3 Th1 N4 112.07(11) . . ?
N3 Th1 N2 101.18(11) . . ?
N4 Th1 N2 98.90(11) . . ?
N3 Th1 N1 65.18(10) . . ?
N4 Th1 N1 66.31(9) . . ?
N2 Th1 N1 65.54(9) . . ?
N3 Th1 Co2 101.42(8) . . ?
N4 Th1 Co2 86.71(7) . . ?
N2 Th1 Co2 152.61(7) . . ?
N1 Th1 Co2 139.32(6) . . ?
N3 Th1 C42 115.71(11) . . ?
N4 Th1 C42 106.52(10) . . ?
N2 Th1 C42 121.33(10) . . ?
N1 Th1 C42 171.54(9) . . ?
Co2 Th1 C42 32.82(7) . . ?
N3 Th1 P1 142.85(9) . . ?
N4 Th1 P1 99.63(7) . . ?
N2 Th1 P1 53.50(7) . . ?
N1 Th1 P1 114.38(6) . . ?
Co2 Th1 P1 99.18(2) . . ?
C42 Th1 P1 70.41(8) . . ?
N3 Th1 P2 51.63(9) . . ?
N4 Th1 P2 163.47(7) . . ?
N2 Th1 P2 88.31(8) . . ?
N1 Th1 P2 104.02(7) . . ?
Co2 Th1 P2 93.72(3) . . ?
C42 Th1 P2 81.81(8) . . ?
P1 Th1 P2 96.62(3) . . ?
 
_diffrn_measured_fraction_theta_max    0.997
_diffrn_reflns_theta_full              25.00
_diffrn_measured_fraction_theta_full   0.999
_refine_diff_density_max    1.689
_refine_diff_density_min   -0.859
_refine_diff_density_rms    0.096
# SQUEEZE RESULTS (APPEND TO CIF)
# Note: Data are Listed for all Voids in the P1 Unit Cell
# i.e. Centre of Gravity, Solvent Accessible Volume,
# Recovered number of Electrons in the Void and
# Details about the Squeezed Material
loop_
  _platon_squeeze_void_nr
  _platon_squeeze_void_average_x
  _platon_squeeze_void_average_y
  _platon_squeeze_void_average_z
  _platon_squeeze_void_volume
  _platon_squeeze_void_count_electrons
  _platon_squeeze_void_content
   1  0.044  0.056  0.447       897       195 ' '
_platon_squeeze_details
;
;

# ------ Material relevant to the Complex 7 ------ 


data_shelxl
 
_audit_creation_method            SHELXL-97
_chemical_name_systematic
;
 ?
;
_chemical_name_common             ‘Complex 7’
_chemical_melting_point           ?
_chemical_formula_moiety          ?
_chemical_formula_sum
  'C105 H144 Co2 N8 O6 P6 U2' 
_chemical_formula_weight          2394.03 
 
loop_
 _atom_type_symbol
 _atom_type_description
 _atom_type_scat_dispersion_real
 _atom_type_scat_dispersion_imag
 _atom_type_scat_source
 'C'  'C'   0.0033   0.0016
 'International Tables Vol C Tables 4.2.6.8 and 6.1.1.4'
 'H'  'H'   0.0000   0.0000
 'International Tables Vol C Tables 4.2.6.8 and 6.1.1.4'
 'N'  'N'   0.0061   0.0033
 'International Tables Vol C Tables 4.2.6.8 and 6.1.1.4'
 'O'  'O'   0.0106   0.0060
 'International Tables Vol C Tables 4.2.6.8 and 6.1.1.4'
 'P'  'P'   0.1023   0.0942
 'International Tables Vol C Tables 4.2.6.8 and 6.1.1.4'
 'Co'  'Co'   0.3494   0.9721
 'International Tables Vol C Tables 4.2.6.8 and 6.1.1.4'
 'U'  'U'  -9.6767   9.6646
 'International Tables Vol C Tables 4.2.6.8 and 6.1.1.4'
 
_symmetry_cell_setting            Triclinic
_symmetry_space_group_name_H-M    P-1
 
loop_
 _symmetry_equiv_pos_as_xyz
 'x, y, z'
 '-x, -y, -z'
 
_cell_length_a                    14.0553(4)
_cell_length_b                    18.7308(5)
_cell_length_c                    22.2945(6)
_cell_angle_alpha                 73.8300(10)
_cell_angle_beta                  89.0240(10)
_cell_angle_gamma                 80.5410(10)
_cell_volume                      5558.0(3)
_cell_formula_units_Z             2
_cell_measurement_temperature     100(2)
_cell_measurement_reflns_used     9208
_cell_measurement_theta_min       2.47
_cell_measurement_theta_max       25.44
 
_exptl_crystal_description        block
_exptl_crystal_colour             red
_exptl_crystal_size_max           0.08
_exptl_crystal_size_mid           0.06
_exptl_crystal_size_min           0.05
_exptl_crystal_density_meas       a
_exptl_crystal_density_diffrn     1.431
_exptl_crystal_density_method     'not measured'
_exptl_crystal_F_000              2412
_exptl_absorpt_coefficient_mu     3.337
_exptl_absorpt_correction_type    multi-scan
_exptl_absorpt_correction_T_min   0.7761
_exptl_absorpt_correction_T_max   0.8509
_exptl_absorpt_process_details    SADABS
 
_exptl_special_details
;
 ?
;
 
_diffrn_ambient_temperature       100(2)
_diffrn_radiation_wavelength      0.71073
_diffrn_radiation_type            MoK\a
_diffrn_radiation_source          'fine-focus sealed tube'
_diffrn_radiation_monochromator   'QUAZAR multilayer mirrors'
_diffrn_measurement_device_type   'Bruker APEX-II CCD'
_diffrn_measurement_method        '\f and \w scans'
_diffrn_detector_area_resol_mean  8.366
_diffrn_reflns_number             99217
_diffrn_reflns_av_R_equivalents   0.0521
_diffrn_reflns_av_sigmaI/netI     0.0514
_diffrn_reflns_limit_h_min        -16
_diffrn_reflns_limit_h_max        16
_diffrn_reflns_limit_k_min        -22
_diffrn_reflns_limit_k_max        22
_diffrn_reflns_limit_l_min        -26
_diffrn_reflns_limit_l_max        26
_diffrn_reflns_theta_min          1.47
_diffrn_reflns_theta_max          25.45
_reflns_number_total              20479
_reflns_number_gt                 16355
_reflns_threshold_expression      >2sigma(I)
 
_computing_data_collection        'Bruker APEX2'
_computing_cell_refinement        'Bruker SAINT'
_computing_data_reduction         'Bruker SAINT'
_computing_structure_solution     'SHELXS-97 (Sheldrick, 2008)'
_computing_structure_refinement   'SHELXL-97 (Sheldrick, 2008)'
_computing_molecular_graphics     'ORTEP-32'
_computing_publication_material   'WinGX'
 
_refine_special_details
;
 Refinement of F^2^ against ALL reflections.  The weighted R-factor wR and
 goodness of fit S are based on F^2^, conventional R-factors R are based
 on F, with F set to zero for negative F^2^. The threshold expression of
 F^2^ > 2sigma(F^2^) is used only for calculating R-factors(gt) etc. and is
 not relevant to the choice of reflections for refinement.  R-factors based
 on F^2^ are statistically about twice as large as those based on F, and R-
 factors based on ALL data will be even larger.
;
 
_refine_ls_structure_factor_coef  Fsqd
_refine_ls_matrix_type            full
_refine_ls_weighting_scheme       calc
_refine_ls_weighting_details
 'calc w=1/[\s^2^(Fo^2^)+(0.0369P)^2^+20.0669P] where P=(Fo^2^+2Fc^2^)/3'
_atom_sites_solution_primary      direct
_atom_sites_solution_secondary    difmap
_atom_sites_solution_hydrogens    geom
_refine_ls_hydrogen_treatment     constr
_refine_ls_extinction_method      none
_refine_ls_extinction_coef        ?
_refine_ls_number_reflns          20479
_refine_ls_number_parameters      1169
_refine_ls_number_restraints      0
_refine_ls_R_factor_all           0.0598
_refine_ls_R_factor_gt            0.0439
_refine_ls_wR_factor_ref          0.0986
_refine_ls_wR_factor_gt           0.0937
_refine_ls_goodness_of_fit_ref    1.057
_refine_ls_restrained_S_all       1.057
_refine_ls_shift/su_max           0.009
_refine_ls_shift/su_mean          0.000
 
loop_
 _atom_site_label
 _atom_site_type_symbol
 _atom_site_fract_x
 _atom_site_fract_y
 _atom_site_fract_z
 _atom_site_U_iso_or_equiv
 _atom_site_adp_type
 _atom_site_occupancy
 _atom_site_symmetry_multiplicity
 _atom_site_calc_flag
 _atom_site_refinement_flags
 _atom_site_disorder_assembly
 _atom_site_disorder_group
C1 C 0.3226(3) 0.1155(3) 0.1688(3) 0.0171(11) Uani 1 1 d . . .
C2 C 0.3438(3) 0.0381(3) 0.1777(3) 0.0221(13) Uani 1 1 d . . .
H2 H 0.3604 0.0052 0.2183 0.027 Uiso 1 1 calc R . .
C3 C 0.3406(4) 0.0091(3) 0.1268(3) 0.0270(14) Uani 1 1 d . . .
H3 H 0.3539 -0.0438 0.1326 0.032 Uiso 1 1 calc R . .
C4 C 0.3179(4) 0.0579(4) 0.0675(3) 0.0309(15) Uani 1 1 d . . .
H4 H 0.3182 0.0381 0.0326 0.037 Uiso 1 1 calc R . .
C5 C 0.2949(4) 0.1346(3) 0.0587(3) 0.0256(13) Uani 1 1 d . . .
H5 H 0.2789 0.1670 0.0179 0.031 Uiso 1 1 calc R . .
C6 C 0.2949(3) 0.1652(3) 0.1092(3) 0.0198(12) Uani 1 1 d . . .
C7 C 0.4213(3) 0.1839(3) 0.2140(2) 0.0161(11) Uani 1 1 d . . .
C8 C 0.5070(3) 0.1509(3) 0.1951(3) 0.0188(12) Uani 1 1 d . . .
H8 H 0.5090 0.1082 0.1798 0.023 Uiso 1 1 calc R . .
C9 C 0.5918(4) 0.1808(3) 0.1986(3) 0.0248(13) Uani 1 1 d . . .
H9 H 0.6510 0.1591 0.1848 0.030 Uiso 1 1 calc R . .
C10 C 0.5876(4) 0.2418(3) 0.2224(3) 0.0282(14) Uani 1 1 d . . .
H10 H 0.6449 0.2613 0.2258 0.034 Uiso 1 1 calc R . .
C11 C 0.5012(4) 0.2751(3) 0.2413(3) 0.0267(13) Uani 1 1 d . . .
H11 H 0.5002 0.3164 0.2584 0.032 Uiso 1 1 calc R . .
C12 C 0.4144(3) 0.2483(3) 0.2355(2) 0.0175(12) Uani 1 1 d . . .
C13 C 0.3174(3) 0.1064(3) 0.2810(2) 0.0155(11) Uani 1 1 d . . .
C14 C 0.3932(4) 0.0624(3) 0.3197(3) 0.0223(12) Uani 1 1 d . . .
H14 H 0.4573 0.0618 0.3055 0.027 Uiso 1 1 calc R . .
C15 C 0.3766(4) 0.0194(3) 0.3789(3) 0.0256(13) Uani 1 1 d . . .
H15 H 0.4289 -0.0099 0.4059 0.031 Uiso 1 1 calc R . .
C16 C 0.2827(4) 0.0198(3) 0.3985(3) 0.0257(13) Uani 1 1 d . . .
H16 H 0.2704 -0.0114 0.4384 0.031 Uiso 1 1 calc R . .
C17 C 0.2060(4) 0.0651(3) 0.3604(3) 0.0203(12) Uani 1 1 d . . .
H17 H 0.1420 0.0649 0.3747 0.024 Uiso 1 1 calc R . .
C18 C 0.2221(3) 0.1112(3) 0.3012(2) 0.0162(11) Uani 1 1 d . . .
C19 C 0.0515(3) 0.1526(3) 0.2790(3) 0.0184(12) Uani 1 1 d . . .
H19A H 0.0331 0.1751 0.3136 0.022 Uiso 1 1 calc R . .
H19B H 0.0477 0.0982 0.2937 0.022 Uiso 1 1 calc R . .
C20 C -0.1486(4) 0.2108(3) 0.2514(3) 0.0215(12) Uani 1 1 d . . .
H20 H -0.2004 0.2272 0.2178 0.026 Uiso 1 1 calc R . .
C21 C -0.1740(4) 0.1397(3) 0.2982(3) 0.0293(14) Uani 1 1 d . . .
H21A H -0.1246 0.1208 0.3319 0.044 Uiso 1 1 calc R . .
H21B H -0.1765 0.1008 0.2768 0.044 Uiso 1 1 calc R . .
H21C H -0.2369 0.1519 0.3157 0.044 Uiso 1 1 calc R . .
C22 C -0.1545(4) 0.2749(3) 0.2819(3) 0.0299(14) Uani 1 1 d . . .
H22A H -0.2202 0.2863 0.2961 0.045 Uiso 1 1 calc R . .
H22B H -0.1382 0.3198 0.2515 0.045 Uiso 1 1 calc R . .
H22C H -0.1089 0.2597 0.3177 0.045 Uiso 1 1 calc R . .
C23 C -0.0403(4) 0.1172(3) 0.1806(3) 0.0238(13) Uani 1 1 d . . .
H23 H -0.0596 0.0761 0.2156 0.029 Uiso 1 1 calc R . .
C24 C -0.1181(4) 0.1379(3) 0.1283(3) 0.0315(15) Uani 1 1 d . . .
H24A H -0.1031 0.1802 0.0943 0.047 Uiso 1 1 calc R . .
H24B H -0.1812 0.1523 0.1448 0.047 Uiso 1 1 calc R . .
H24C H -0.1196 0.0943 0.1123 0.047 Uiso 1 1 calc R . .
C25 C 0.2689(4) 0.2985(3) 0.0476(3) 0.0297(14) Uani 1 1 d . . .
H25A H 0.2155 0.2985 0.0192 0.036 Uiso 1 1 calc R . .
H25B H 0.3310 0.2911 0.0267 0.036 Uiso 1 1 calc R . .
C26 C 0.1616(9) 0.4520(4) 0.0079(3) 0.102(5) Uani 1 1 d . . .
H26 H 0.1028 0.4277 0.0109 0.122 Uiso 1 1 calc R . .
C27 C 0.1316(11) 0.5256(5) 0.0301(4) 0.137(6) Uani 1 1 d . . .
H27A H 0.1866 0.5525 0.0266 0.205 Uiso 1 1 calc R . .
H27B H 0.1122 0.5116 0.0736 0.205 Uiso 1 1 calc R . .
H27C H 0.0775 0.5583 0.0037 0.205 Uiso 1 1 calc R . .
C31 C 0.3156(4) 0.3405(3) 0.2791(3) 0.0221(12) Uani 1 1 d . . .
H31A H 0.3482 0.3827 0.2563 0.027 Uiso 1 1 calc R . .
H31B H 0.3434 0.3198 0.3221 0.027 Uiso 1 1 calc R . .
C32 C 0.2032(4) 0.5109(3) 0.2009(3) 0.0309(14) Uani 1 1 d . . .
H32A H 0.1840 0.5657 0.1909 0.046 Uiso 1 1 calc R . .
H32B H 0.1753 0.4924 0.1692 0.046 Uiso 1 1 calc R . .
H32C H 0.2737 0.4984 0.2012 0.046 Uiso 1 1 calc R . .
C33 C 0.1666(4) 0.4740(3) 0.2650(3) 0.0249(13) Uani 1 1 d . . .
H33 H 0.0956 0.4923 0.2641 0.030 Uiso 1 1 calc R . .
C34 C 0.2117(5) 0.4978(3) 0.3166(3) 0.0379(16) Uani 1 1 d . . .
H34A H 0.2797 0.4741 0.3232 0.057 Uiso 1 1 calc R . .
H34B H 0.1772 0.4818 0.3553 0.057 Uiso 1 1 calc R . .
H34C H 0.2072 0.5527 0.3043 0.057 Uiso 1 1 calc R . .
C35 C 0.0415(4) 0.3593(3) 0.3663(3) 0.0313(14) Uani 1 1 d . . .
H35A H 0.0056 0.3430 0.3366 0.047 Uiso 1 1 calc R . .
H35B H 0.0276 0.4144 0.3568 0.047 Uiso 1 1 calc R . .
H35C H 0.0221 0.3367 0.4088 0.047 Uiso 1 1 calc R . .
C36 C 0.1501(4) 0.3339(3) 0.3608(3) 0.0249(13) Uani 1 1 d . . .
H36 H 0.1860 0.3560 0.3876 0.030 Uiso 1 1 calc R . .
C37 C 0.1772(4) 0.2481(3) 0.3831(3) 0.0298(14) Uani 1 1 d . . .
H37A H 0.1570 0.2298 0.4262 0.045 Uiso 1 1 calc R . .
H37B H 0.2473 0.2338 0.3813 0.045 Uiso 1 1 calc R . .
H37C H 0.1448 0.2257 0.3560 0.045 Uiso 1 1 calc R . .
C38 C 0.0092(3) 0.3815(3) 0.1610(3) 0.0178(12) Uani 1 1 d . . .
C39 C -0.1353(4) 0.3304(3) 0.1179(3) 0.0318(15) Uani 1 1 d . . .
C40 C 0.0387(4) 0.2773(3) 0.0748(3) 0.0293(14) Uani 1 1 d . . .
C41 C -0.0046(4) -0.3635(3) 0.3455(3) 0.0318(15) Uani 1 1 d . . .
C42 C -0.0409(4) -0.2539(3) 0.4253(3) 0.0301(15) Uani 1 1 d . . .
C43 C -0.2976(3) -0.1404(3) 0.3890(3) 0.0213(13) Uani 1 1 d . . .
C44 C -0.3245(3) -0.0928(3) 0.3279(2) 0.0167(12) Uani 1 1 d . . .
C45 C -0.3450(3) -0.0157(3) 0.3175(3) 0.0185(12) Uani 1 1 d . . .
H45 H -0.3592 0.0160 0.2762 0.022 Uiso 1 1 calc R . .
C46 C -0.3452(4) 0.0160(3) 0.3666(3) 0.0236(13) Uani 1 1 d . . .
H46 H -0.3595 0.0691 0.3592 0.028 Uiso 1 1 calc R . .
C47 C -0.3243(4) -0.0301(3) 0.4266(3) 0.0295(14) Uani 1 1 d . . .
H47 H -0.3271 -0.0085 0.4606 0.035 Uiso 1 1 calc R . .
C48 C -0.2995(4) -0.1074(3) 0.4380(3) 0.0259(13) Uani 1 1 d . . .
H48 H -0.2836 -0.1382 0.4794 0.031 Uiso 1 1 calc R . .
C49 C -0.5073(4) -0.1305(3) 0.3017(3) 0.0216(12) Uani 1 1 d . . .
H49 H -0.5101 -0.0866 0.3156 0.026 Uiso 1 1 calc R . .
C50 C -0.5907(4) -0.1608(3) 0.2989(3) 0.0292(14) Uani 1 1 d . . .
H50 H -0.6506 -0.1384 0.3114 0.035 Uiso 1 1 calc R . .
C51 C -0.5847(4) -0.2240(3) 0.2777(3) 0.0378(17) Uani 1 1 d . . .
H51 H -0.6415 -0.2442 0.2746 0.045 Uiso 1 1 calc R . .
C52 C -0.4982(4) -0.2582(3) 0.2609(3) 0.0372(17) Uani 1 1 d . . .
H52 H -0.4961 -0.3012 0.2460 0.045 Uiso 1 1 calc R . .
C53 C -0.4126(4) -0.2299(3) 0.2656(3) 0.0271(14) Uani 1 1 d . . .
C54 C -0.4210(3) -0.1642(3) 0.2844(3) 0.0190(12) Uani 1 1 d . . .
C55 C -0.3166(3) -0.0878(3) 0.2170(2) 0.0150(11) Uani 1 1 d . . .
C56 C -0.3920(4) -0.0424(3) 0.1780(3) 0.0181(12) Uani 1 1 d . . .
H56 H -0.4563 -0.0409 0.1922 0.022 Uiso 1 1 calc R . .
C57 C -0.3750(4) 0.0005(3) 0.1192(3) 0.0225(13) Uani 1 1 d . . .
H57 H -0.4269 0.0316 0.0928 0.027 Uiso 1 1 calc R . .
C58 C -0.2807(4) -0.0023(3) 0.0986(3) 0.0207(12) Uani 1 1 d . . .
H58 H -0.2679 0.0284 0.0585 0.025 Uiso 1 1 calc R . .
C59 C -0.2054(4) -0.0494(3) 0.1363(2) 0.0186(12) Uani 1 1 d . . .
H59 H -0.1416 -0.0515 0.1214 0.022 Uiso 1 1 calc R . .
C60 C -0.2217(3) -0.0941(3) 0.1963(2) 0.0157(11) Uani 1 1 d . . .
C61 C -0.0512(3) -0.1358(3) 0.2191(3) 0.0208(12) Uani 1 1 d . . .
H61A H -0.0475 -0.0815 0.2029 0.025 Uiso 1 1 calc R . .
H61B H -0.0322 -0.1600 0.1855 0.025 Uiso 1 1 calc R . .
C62 C 0.0381(4) -0.0957(3) 0.3160(3) 0.0230(13) Uani 1 1 d . . .
H62 H 0.0575 -0.0554 0.2805 0.028 Uiso 1 1 calc R . .
C63 C 0.1144(4) -0.1136(3) 0.3690(3) 0.0326(15) Uani 1 1 d . . .
H63A H 0.1139 -0.0691 0.3839 0.049 Uiso 1 1 calc R . .
H63B H 0.1783 -0.1277 0.3533 0.049 Uiso 1 1 calc R . .
H63C H 0.0997 -0.1555 0.4034 0.049 Uiso 1 1 calc R . .
C64 C -0.0607(4) -0.0647(3) 0.3368(3) 0.0270(13) Uani 1 1 d . . .
H64A H -0.0815 -0.1031 0.3718 0.040 Uiso 1 1 calc R . .
H64B H -0.1077 -0.0516 0.3018 0.040 Uiso 1 1 calc R . .
H64C H -0.0561 -0.0197 0.3500 0.040 Uiso 1 1 calc R . .
C65 C 0.1493(4) -0.1917(3) 0.2479(3) 0.0229(13) Uani 1 1 d . . .
H65 H 0.2009 -0.2060 0.2815 0.027 Uiso 1 1 calc R . .
C66 C 0.1571(4) -0.2580(3) 0.2196(3) 0.0336(15) Uani 1 1 d . . .
H66A H 0.1135 -0.2441 0.1829 0.050 Uiso 1 1 calc R . .
H66B H 0.1391 -0.3018 0.2507 0.050 Uiso 1 1 calc R . .
H66C H 0.2236 -0.2706 0.2073 0.050 Uiso 1 1 calc R . .
C67 C 0.1724(4) -0.1212(3) 0.2001(3) 0.0275(14) Uani 1 1 d . . .
H67A H 0.2326 -0.1340 0.1797 0.041 Uiso 1 1 calc R . .
H67B H 0.1797 -0.0829 0.2212 0.041 Uiso 1 1 calc R . .
H67C H 0.1198 -0.1014 0.1686 0.041 Uiso 1 1 calc R . .
C68 C -0.3105(4) -0.3273(3) 0.2284(4) 0.0425(19) Uani 1 1 d . . .
H68A H -0.3370 -0.3098 0.1849 0.051 Uiso 1 1 calc R . .
H68B H -0.3430 -0.3688 0.2527 0.051 Uiso 1 1 calc R . .
C69 C -0.1585(5) -0.4606(3) 0.2534(5) 0.071(3) Uani 1 1 d . . .
H69 H -0.0872 -0.4779 0.2539 0.086 Uiso 1 1 calc R . .
C70 C -0.1920(5) -0.4914(4) 0.3201(6) 0.105(5) Uani 1 1 d . . .
H70A H -0.2625 -0.4791 0.3208 0.158 Uiso 1 1 calc R . .
H70B H -0.1628 -0.4686 0.3482 0.158 Uiso 1 1 calc R . .
H70C H -0.1723 -0.5463 0.3339 0.158 Uiso 1 1 calc R . .
C71 C -0.2034(5) -0.4915(4) 0.2065(6) 0.103(5) Uani 1 1 d . . .
H71A H -0.2007 -0.5460 0.2238 0.154 Uiso 1 1 calc R . .
H71B H -0.1678 -0.4814 0.1677 0.154 Uiso 1 1 calc R . .
H71C H -0.2709 -0.4670 0.1978 0.154 Uiso 1 1 calc R . .
C72 C -0.1463(4) -0.3273(3) 0.1482(3) 0.0364(17) Uani 1 1 d . . .
H72 H -0.1843 -0.3515 0.1242 0.044 Uiso 1 1 calc R . .
C73 C -0.1707(4) -0.2424(3) 0.1209(3) 0.0388(17) Uani 1 1 d . . .
H73A H -0.1358 -0.2176 0.1448 0.058 Uiso 1 1 calc R . .
H73B H -0.2403 -0.2262 0.1231 0.058 Uiso 1 1 calc R . .
H73C H -0.1518 -0.2285 0.0772 0.058 Uiso 1 1 calc R . .
C74 C -0.0383(4) -0.3546(4) 0.1414(3) 0.0393(17) Uani 1 1 d . . .
H74A H -0.0216 -0.3375 0.0974 0.059 Uiso 1 1 calc R . .
H74B H -0.0246 -0.4098 0.1557 0.059 Uiso 1 1 calc R . .
H74C H 0.0001 -0.3338 0.1666 0.059 Uiso 1 1 calc R . .
C75 C -0.2760(4) -0.2716(3) 0.4538(3) 0.0331(15) Uani 1 1 d . . .
H75A H -0.3363 -0.2585 0.4749 0.040 Uiso 1 1 calc R . .
H75B H -0.2201 -0.2758 0.4818 0.040 Uiso 1 1 calc R . .
C76 C -0.2211(5) -0.4344(4) 0.5012(3) 0.0476(19) Uani 1 1 d . . .
H76 H -0.2528 -0.4245 0.5392 0.057 Uiso 1 1 calc R . .
C77 C -0.2374(8) -0.5120(4) 0.4973(5) 0.096(4) Uani 1 1 d . . .
H77A H -0.1935 -0.5281 0.4672 0.144 Uiso 1 1 calc R . .
H77B H -0.3043 -0.5088 0.4838 0.144 Uiso 1 1 calc R . .
H77C H -0.2247 -0.5486 0.5385 0.144 Uiso 1 1 calc R . .
C78 C -0.1133(5) -0.4319(4) 0.5062(3) 0.0460(18) Uani 1 1 d . . .
H78A H -0.0841 -0.4723 0.5424 0.069 Uiso 1 1 calc R . .
H78B H -0.1047 -0.3830 0.5114 0.069 Uiso 1 1 calc R . .
H78C H -0.0820 -0.4388 0.4682 0.069 Uiso 1 1 calc R . .
C79 C -0.4513(6) -0.3745(5) 0.4986(4) 0.067(2) Uani 1 1 d . . .
H79A H -0.5218 -0.3676 0.4951 0.101 Uiso 1 1 calc R . .
H79B H -0.4327 -0.3388 0.5193 0.101 Uiso 1 1 calc R . .
H79C H -0.4262 -0.4261 0.5233 0.101 Uiso 1 1 calc R . .
C80 C -0.4087(5) -0.3600(4) 0.4324(4) 0.0482(19) Uani 1 1 d . . .
H80 H -0.4394 -0.3078 0.4091 0.058 Uiso 1 1 calc R . .
C81 C -0.4391(6) -0.4094(5) 0.3986(4) 0.064(2) Uani 1 1 d . . .
H81A H -0.4131 -0.4620 0.4203 0.096 Uiso 1 1 calc R . .
H81B H -0.4150 -0.3967 0.3561 0.096 Uiso 1 1 calc R . .
H81C H -0.5098 -0.4027 0.3968 0.096 Uiso 1 1 calc R . .
C83 C 0.5514(8) 0.2034(5) 0.0108(4) 0.070(3) Uani 1 1 d . . .
H83 H 0.5005 0.1890 0.0377 0.084 Uiso 1 1 calc R . .
C84 C 0.5593(6) 0.1890(5) -0.0490(5) 0.070(3) Uani 1 1 d . . .
C85 C 0.4880(7) 0.1523(6) -0.0671(6) 0.098(4) Uani 1 1 d . . .
H85A H 0.4242 0.1735 -0.0555 0.147 Uiso 1 1 calc R . .
H85B H 0.5019 0.0982 -0.0458 0.147 Uiso 1 1 calc R . .
H85C H 0.4887 0.1601 -0.1124 0.147 Uiso 1 1 calc R . .
C86 C 0.6363(6) 0.2109(5) -0.0853(4) 0.064(2) Uani 1 1 d . . .
H86 H 0.6430 0.2023 -0.1254 0.077 Uiso 1 1 calc R . .
C87 C 0.6987(8) 0.2610(6) -0.0097(5) 0.089(3) Uani 1 1 d . . .
H87 H 0.7447 0.2856 0.0038 0.107 Uiso 1 1 calc R . .
C88 C 0.6196(7) 0.2385(5) 0.0273(5) 0.076(3) Uani 1 1 d . . .
H88 H 0.6141 0.2489 0.0667 0.091 Uiso 1 1 calc R . .
C89 C 0.7041(8) 0.2455(6) -0.0636(5) 0.094(3) Uani 1 1 d . . .
H89 H 0.7568 0.2586 -0.0893 0.113 Uiso 1 1 calc R . .
C90 C 0.5454(10) 0.5183(9) 0.1600(9) 0.135(5) Uani 1 1 d . . .
H90 H 0.5791 0.5058 0.1261 0.162 Uiso 1 1 calc R . .
C91 C 0.4811(10) 0.5859(7) 0.1495(8) 0.111(5) Uani 1 1 d . . .
H91 H 0.4690 0.6220 0.1098 0.133 Uiso 1 1 calc R . .
C92 C 0.4382(8) 0.5942(9) 0.2020(8) 0.111(5) Uani 1 1 d . . .
H92 H 0.3934 0.6397 0.1957 0.134 Uiso 1 1 calc R . .
C93 C 0.5606(7) 0.4696(6) 0.2191(8) 0.087(4) Uani 1 1 d . . .
H93 H 0.6055 0.4246 0.2228 0.105 Uiso 1 1 calc R . .
C94 C 0.4455(8) 0.5510(6) 0.2621(7) 0.092(4) Uani 1 1 d . . .
H94 H 0.4088 0.5642 0.2947 0.110 Uiso 1 1 calc R . .
C95 C 0.5202(13) 0.4776(9) 0.2719(8) 0.144(7) Uani 1 1 d . . .
C96 C 0.5338(10) 0.4331(7) 0.3302(7) 0.141(6) Uani 1 1 d . . .
H96A H 0.5231 0.3823 0.3313 0.212 Uiso 1 1 calc R . .
H96B H 0.4882 0.4534 0.3575 0.212 Uiso 1 1 calc R . .
H96C H 0.6000 0.4308 0.3446 0.212 Uiso 1 1 calc R . .
C97 C 0.6168(6) 0.2286(5) 0.4061(4) 0.063(2) Uani 1 1 d . . .
H97 H 0.6395 0.2479 0.3653 0.075 Uiso 1 1 calc R . .
C98 C 0.5406(7) 0.1895(4) 0.4128(5) 0.077(3) Uani 1 1 d . . .
H98 H 0.5131 0.1848 0.3757 0.092 Uiso 1 1 calc R . .
C99 C 0.5039(8) 0.1590(5) 0.4641(5) 0.093(4) Uani 1 1 d . . .
H99 H 0.4532 0.1304 0.4676 0.112 Uiso 1 1 calc R . .
C100 C 0.5509(10) 0.1740(6) 0.5189(5) 0.095(4) Uani 1 1 d . . .
H100 H 0.5250 0.1545 0.5586 0.114 Uiso 1 1 calc R . .
C101 C 0.6248(9) 0.2114(7) 0.5183(5) 0.094(4) Uani 1 1 d . . .
H101 H 0.6512 0.2182 0.5548 0.113 Uiso 1 1 calc R . .
C102 C 0.6608(8) 0.2408(6) 0.4552(5) 0.088(3) Uani 1 1 d . . .
C103 C 0.7339(9) 0.2833(10) 0.4533(8) 0.185(8) Uani 1 1 d . . .
H10A H 0.7774 0.2774 0.4196 0.278 Uiso 1 1 calc R . .
H10B H 0.7702 0.2659 0.4933 0.278 Uiso 1 1 calc R . .
H10C H 0.7055 0.3366 0.4457 0.278 Uiso 1 1 calc R . .
C104 C 0.1358(4) -0.3048(4) 0.3843(4) 0.048(2) Uani 1 1 d . . .
C105 C 0.0572(4) 0.0865(3) 0.1582(3) 0.0270(13) Uani 1 1 d . . .
H10D H 0.0507 0.0432 0.1429 0.041 Uiso 1 1 calc R . .
H10E H 0.1048 0.0706 0.1929 0.041 Uiso 1 1 calc R . .
H10F H 0.0785 0.1259 0.1243 0.041 Uiso 1 1 calc R . .
C300 C 0.3595(9) 0.5111(6) 0.0446(6) 0.116(4) Uiso 1 1 d . . .
H30A H 0.3606 0.5179 0.0866 0.174 Uiso 1 1 calc R . .
H30B H 0.2985 0.5379 0.0228 0.174 Uiso 1 1 calc R . .
H30C H 0.4134 0.5312 0.0212 0.174 Uiso 1 1 calc R . .
C302 C 0.3696(7) 0.4195(6) 0.0501(5) 0.088(3) Uiso 1 1 d . . .
H302 H 0.3896 0.4109 0.0091 0.105 Uiso 1 1 calc R . .
C304 C 0.4382(8) 0.3831(6) 0.0934(5) 0.105(4) Uiso 1 1 d . . .
H30D H 0.5016 0.3840 0.0745 0.158 Uiso 1 1 calc R . .
H30E H 0.4286 0.3308 0.1107 0.158 Uiso 1 1 calc R . .
H30F H 0.4350 0.4079 0.1269 0.158 Uiso 1 1 calc R . .
C400 C 0.1864(8) 0.4664(7) -0.0509(5) 0.109(4) Uiso 1 1 d . . .
H40A H 0.1304 0.4941 -0.0779 0.163 Uiso 1 1 calc R . .
H40B H 0.2092 0.4189 -0.0610 0.163 Uiso 1 1 calc R . .
H40C H 0.2381 0.4968 -0.0575 0.163 Uiso 1 1 calc R . .
N1 N 0.1509(3) 0.1624(2) 0.2611(2) 0.0161(9) Uani 1 1 d . . .
N2 N 0.3314(3) 0.1521(2) 0.21785(19) 0.0137(9) Uani 1 1 d . . .
N3 N 0.3227(3) 0.2824(2) 0.2465(2) 0.0181(10) Uani 1 1 d . . .
N4 N 0.2680(3) 0.2406(2) 0.1073(2) 0.0211(10) Uani 1 1 d . . .
N5 N -0.3317(3) -0.1320(2) 0.2804(2) 0.0150(9) Uani 1 1 d . . .
N6 N -0.1506(3) -0.1451(2) 0.2369(2) 0.0171(10) Uani 1 1 d . . .
N7 N -0.3198(3) -0.2657(2) 0.2573(3) 0.0291(12) Uani 1 1 d . . .
N8 N -0.2699(3) -0.2164(2) 0.3940(2) 0.0257(11) Uani 1 1 d . . .
O1 O -0.2162(3) 0.3488(3) 0.1038(3) 0.0597(16) Uani 1 1 d . . .
O2 O 0.0604(3) 0.2634(2) 0.0285(2) 0.0391(11) Uani 1 1 d . . .
O3 O 0.0118(3) 0.4392(2) 0.1700(2) 0.0342(11) Uani 1 1 d . . .
O4 O -0.0041(3) -0.4242(2) 0.3415(2) 0.0462(12) Uani 1 1 d . . .
O5 O 0.2178(3) -0.3195(3) 0.3975(3) 0.079(2) Uani 1 1 d . . .
O6 O -0.0643(3) -0.2385(3) 0.4707(2) 0.0413(11) Uani 1 1 d . . .
P1 P -0.27488(12) -0.35887(9) 0.43136(8) 0.0374(4) Uani 1 1 d . . .
P2 P -0.17868(10) -0.35632(8) 0.23083(10) 0.0379(5) Uani 1 1 d . . .
P3 P 0.03232(9) -0.17887(7) 0.28729(7) 0.0181(3) Uani 1 1 d . . .
P4 P -0.03276(9) 0.19840(7) 0.21148(7) 0.0167(3) Uani 1 1 d . . .
P5 P 0.25236(10) 0.38623(9) 0.07141(7) 0.0264(3) Uani 1 1 d . . .
P6 P 0.18400(10) 0.37021(8) 0.27901(7) 0.0212(3) Uani 1 1 d . . .
Co1 Co 0.01271(5) -0.28041(4) 0.36126(4) 0.02542(19) Uani 1 1 d . . .
Co2 Co -0.01208(5) 0.30230(4) 0.14033(3) 0.01694(16) Uani 1 1 d . . .
U1 U -0.193398(13) -0.245410(10) 0.310914(10) 0.02071(7) Uani 1 1 d . . .
U2 U 0.194450(12) 0.266073(10) 0.191589(9) 0.01395(6) Uani 1 1 d . . .
 
loop_
 _atom_site_aniso_label
 _atom_site_aniso_U_11
 _atom_site_aniso_U_22
 _atom_site_aniso_U_33
 _atom_site_aniso_U_23
 _atom_site_aniso_U_13
 _atom_site_aniso_U_12
C1 0.014(3) 0.017(3) 0.023(3) -0.011(2) -0.003(2) 0.001(2)
C2 0.012(3) 0.018(3) 0.037(4) -0.009(3) 0.002(2) -0.001(2)
C3 0.016(3) 0.027(3) 0.046(4) -0.023(3) 0.001(3) -0.005(2)
C4 0.016(3) 0.049(4) 0.042(4) -0.035(3) 0.000(3) -0.005(3)
C5 0.016(3) 0.040(4) 0.024(3) -0.018(3) -0.005(2) 0.004(2)
C6 0.010(2) 0.025(3) 0.025(3) -0.010(3) -0.004(2) 0.003(2)
C7 0.012(3) 0.017(3) 0.017(3) -0.003(2) -0.004(2) 0.001(2)
C8 0.015(3) 0.018(3) 0.022(3) -0.006(2) -0.002(2) 0.000(2)
C9 0.014(3) 0.025(3) 0.033(4) -0.007(3) 0.000(2) 0.001(2)
C10 0.017(3) 0.035(3) 0.035(4) -0.011(3) -0.002(3) -0.006(2)
C11 0.021(3) 0.028(3) 0.036(4) -0.013(3) -0.002(3) -0.009(2)
C12 0.014(3) 0.019(3) 0.020(3) -0.008(2) -0.002(2) 0.003(2)
C13 0.017(3) 0.012(2) 0.017(3) -0.003(2) -0.002(2) -0.003(2)
C14 0.017(3) 0.026(3) 0.024(3) -0.008(3) -0.004(2) 0.000(2)
C15 0.022(3) 0.026(3) 0.024(4) 0.001(3) -0.008(2) -0.001(2)
C16 0.032(3) 0.027(3) 0.012(3) 0.004(2) -0.008(2) -0.005(2)
C17 0.018(3) 0.021(3) 0.024(3) -0.007(2) 0.001(2) -0.006(2)
C18 0.013(3) 0.017(3) 0.018(3) -0.003(2) -0.008(2) -0.001(2)
C19 0.013(3) 0.018(3) 0.022(3) -0.001(2) -0.002(2) -0.005(2)
C20 0.013(3) 0.021(3) 0.028(3) 0.000(2) -0.003(2) -0.003(2)
C21 0.021(3) 0.025(3) 0.037(4) 0.000(3) -0.001(3) -0.005(2)
C22 0.022(3) 0.028(3) 0.037(4) -0.004(3) 0.005(3) -0.004(2)
C23 0.026(3) 0.016(3) 0.029(4) -0.003(2) -0.009(3) -0.009(2)
C24 0.036(3) 0.026(3) 0.035(4) -0.010(3) -0.011(3) -0.010(3)
C25 0.027(3) 0.036(3) 0.017(3) 0.000(3) 0.003(3) 0.004(3)
C26 0.225(12) 0.014(4) 0.027(5) 0.016(3) 0.058(6) 0.048(5)
C27 0.312(18) 0.035(5) 0.031(5) 0.000(4) -0.011(8) 0.049(8)
C31 0.017(3) 0.023(3) 0.028(3) -0.012(3) -0.008(2) 0.001(2)
C32 0.029(3) 0.022(3) 0.040(4) -0.007(3) -0.002(3) -0.002(2)
C33 0.027(3) 0.014(3) 0.034(4) -0.011(3) -0.009(3) 0.004(2)
C34 0.050(4) 0.017(3) 0.047(4) -0.014(3) -0.015(3) 0.000(3)
C35 0.026(3) 0.034(3) 0.036(4) -0.016(3) 0.001(3) 0.000(3)
C36 0.027(3) 0.027(3) 0.025(3) -0.014(3) -0.008(3) -0.004(2)
C37 0.037(3) 0.023(3) 0.031(4) -0.012(3) -0.007(3) -0.002(3)
C38 0.007(2) 0.021(3) 0.021(3) -0.001(2) -0.001(2) 0.003(2)
C39 0.032(4) 0.016(3) 0.039(4) 0.010(3) -0.017(3) -0.013(2)
C40 0.033(3) 0.020(3) 0.031(4) 0.000(3) -0.012(3) -0.002(2)
C41 0.019(3) 0.024(3) 0.038(4) 0.008(3) 0.010(3) 0.005(2)
C42 0.024(3) 0.024(3) 0.038(4) 0.004(3) -0.003(3) -0.013(2)
C43 0.009(2) 0.026(3) 0.023(3) 0.003(3) 0.000(2) -0.004(2)
C44 0.002(2) 0.022(3) 0.022(3) 0.000(2) -0.004(2) 0.0004(19)
C45 0.008(2) 0.022(3) 0.022(3) 0.000(2) -0.004(2) -0.002(2)
C46 0.016(3) 0.028(3) 0.031(4) -0.012(3) 0.001(2) -0.007(2)
C47 0.021(3) 0.038(4) 0.034(4) -0.015(3) -0.004(3) -0.008(3)
C48 0.017(3) 0.039(4) 0.018(3) -0.002(3) 0.000(2) -0.008(2)
C49 0.016(3) 0.018(3) 0.028(3) -0.002(2) -0.001(2) 0.000(2)
C50 0.010(3) 0.026(3) 0.050(4) -0.011(3) 0.001(3) 0.002(2)
C51 0.008(3) 0.033(4) 0.075(5) -0.019(3) -0.002(3) -0.006(2)
C52 0.022(3) 0.022(3) 0.075(5) -0.025(3) -0.005(3) -0.002(2)
C53 0.009(3) 0.021(3) 0.051(4) -0.011(3) 0.002(3) 0.001(2)
C54 0.010(3) 0.012(3) 0.032(4) 0.000(2) -0.004(2) -0.004(2)
C55 0.015(3) 0.012(2) 0.018(3) -0.004(2) 0.000(2) -0.003(2)
C56 0.011(2) 0.015(3) 0.026(3) -0.004(2) -0.003(2) 0.003(2)
C57 0.024(3) 0.018(3) 0.023(3) -0.005(2) -0.010(2) 0.005(2)
C58 0.023(3) 0.018(3) 0.019(3) -0.003(2) -0.002(2) -0.003(2)
C59 0.016(3) 0.019(3) 0.021(3) -0.006(2) -0.003(2) 0.000(2)
C60 0.014(3) 0.009(2) 0.024(3) -0.006(2) -0.006(2) 0.0042(19)
C61 0.010(3) 0.022(3) 0.025(3) 0.001(2) -0.001(2) -0.003(2)
C62 0.016(3) 0.025(3) 0.027(3) -0.003(3) 0.000(2) -0.006(2)
C63 0.026(3) 0.036(4) 0.034(4) -0.002(3) -0.007(3) -0.013(3)
C64 0.027(3) 0.023(3) 0.029(4) -0.003(3) 0.002(3) -0.004(2)
C65 0.014(3) 0.021(3) 0.028(4) 0.003(2) 0.001(2) -0.002(2)
C66 0.020(3) 0.027(3) 0.051(4) -0.007(3) 0.008(3) -0.003(2)
C67 0.015(3) 0.027(3) 0.035(4) 0.001(3) 0.008(3) -0.004(2)
C68 0.016(3) 0.020(3) 0.097(6) -0.025(4) 0.004(3) -0.004(2)
C69 0.017(3) 0.013(3) 0.178(10) -0.020(5) 0.021(5) -0.001(3)
C70 0.037(4) 0.018(4) 0.230(13) 0.009(6) 0.063(6) 0.002(3)
C71 0.029(4) 0.029(4) 0.268(15) -0.070(7) -0.004(6) -0.003(3)
C72 0.021(3) 0.029(3) 0.073(5) -0.039(3) -0.008(3) 0.003(3)
C73 0.027(3) 0.037(4) 0.057(5) -0.024(3) -0.008(3) 0.003(3)
C74 0.027(3) 0.035(4) 0.062(5) -0.027(3) -0.002(3) 0.005(3)
C75 0.021(3) 0.028(3) 0.040(4) 0.008(3) -0.005(3) -0.003(2)
C76 0.063(5) 0.028(4) 0.040(5) 0.015(3) -0.009(4) -0.017(3)
C77 0.120(9) 0.026(4) 0.120(9) 0.021(5) -0.048(7) -0.016(5)
C78 0.058(5) 0.031(4) 0.035(4) 0.003(3) -0.011(3) 0.013(3)
C79 0.056(5) 0.073(6) 0.066(6) 0.005(5) 0.004(4) -0.033(4)
C80 0.038(4) 0.044(4) 0.062(5) -0.006(4) 0.000(4) -0.020(3)
C81 0.057(5) 0.064(5) 0.082(7) -0.032(5) -0.004(5) -0.022(4)
C83 0.090(7) 0.058(6) 0.040(6) -0.002(4) 0.003(5) 0.028(5)
C84 0.049(5) 0.046(5) 0.099(8) -0.007(5) 0.006(5) 0.013(4)
C85 0.072(7) 0.075(7) 0.149(11) -0.036(7) 0.018(7) -0.014(6)
C86 0.052(5) 0.073(6) 0.071(6) -0.032(5) 0.021(5) -0.004(4)
C87 0.084(8) 0.096(8) 0.073(8) -0.013(6) -0.034(6) 0.012(6)
C88 0.074(7) 0.074(7) 0.052(6) 0.006(5) 0.002(5) 0.027(5)
C89 0.072(7) 0.117(9) 0.078(8) -0.011(7) -0.008(6) 0.001(6)
C90 0.103(10) 0.118(12) 0.204(18) -0.048(12) -0.030(11) -0.067(10)
C91 0.108(10) 0.071(8) 0.161(14) -0.025(9) -0.050(10) -0.045(7)
C92 0.074(8) 0.153(14) 0.162(14) -0.114(13) 0.010(9) -0.054(8)
C93 0.068(7) 0.069(7) 0.123(11) -0.006(8) -0.031(7) -0.041(5)
C94 0.102(8) 0.058(6) 0.119(11) -0.014(7) -0.055(8) -0.035(6)
C95 0.187(16) 0.138(14) 0.127(13) -0.005(11) -0.069(12) -0.134(14)
C96 0.176(13) 0.108(10) 0.144(13) 0.009(9) -0.085(11) -0.100(10)
C97 0.055(5) 0.079(6) 0.056(6) -0.020(5) 0.025(4) -0.018(4)
C98 0.077(6) 0.041(5) 0.099(8) -0.008(5) 0.025(6) 0.007(4)
C99 0.113(8) 0.034(5) 0.099(9) 0.015(5) 0.067(8) 0.018(5)
C100 0.147(12) 0.073(7) 0.032(6) 0.008(5) 0.013(7) 0.038(7)
C101 0.094(9) 0.088(8) 0.067(8) 0.010(6) 0.007(7) 0.025(7)
C102 0.081(7) 0.090(8) 0.086(9) -0.025(7) -0.020(6) 0.005(6)
C103 0.083(10) 0.26(2) 0.25(2) -0.150(18) -0.054(11) -0.003(11)
C104 0.023(3) 0.034(4) 0.062(5) 0.030(3) -0.005(3) -0.005(3)
C105 0.030(3) 0.017(3) 0.033(4) -0.006(3) -0.004(3) -0.002(2)
N1 0.013(2) 0.016(2) 0.018(3) -0.0022(19) -0.0046(18) -0.0023(17)
N2 0.013(2) 0.013(2) 0.014(2) -0.0018(18) -0.0008(17) -0.0017(16)
N3 0.015(2) 0.016(2) 0.024(3) -0.009(2) -0.0047(19) 0.0000(17)
N4 0.021(2) 0.022(2) 0.015(3) -0.002(2) -0.0024(19) 0.0082(19)
N5 0.009(2) 0.012(2) 0.023(3) -0.0017(19) 0.0007(18) -0.0020(16)
N6 0.009(2) 0.012(2) 0.025(3) 0.0010(19) -0.0005(18) -0.0012(16)
N7 0.013(2) 0.013(2) 0.062(4) -0.014(2) 0.004(2) -0.0011(18)
N8 0.016(2) 0.021(2) 0.031(3) 0.005(2) -0.002(2) -0.0023(19)
O1 0.025(3) 0.045(3) 0.088(4) 0.022(3) -0.032(3) -0.012(2)
O2 0.055(3) 0.041(3) 0.024(3) -0.014(2) -0.007(2) -0.003(2)
O3 0.026(2) 0.019(2) 0.058(3) -0.018(2) -0.017(2) 0.0082(17)
O4 0.056(3) 0.018(2) 0.053(3) -0.005(2) 0.003(2) 0.017(2)
O5 0.016(2) 0.076(4) 0.102(5) 0.051(3) -0.019(3) -0.009(2)
O6 0.043(3) 0.044(3) 0.036(3) -0.002(2) -0.001(2) -0.021(2)
P1 0.0399(10) 0.0284(9) 0.0366(11) 0.0103(8) -0.0147(8) -0.0166(7)
P2 0.0106(7) 0.0131(7) 0.0906(15) -0.0169(8) 0.0048(8) -0.0002(6)
P3 0.0087(6) 0.0162(7) 0.0242(8) 0.0035(6) -0.0014(6) -0.0027(5)
P4 0.0131(6) 0.0133(7) 0.0206(8) 0.0010(6) -0.0054(6) -0.0027(5)
P5 0.0207(7) 0.0315(8) 0.0235(9) 0.0010(7) -0.0033(6) -0.0091(6)
P6 0.0191(7) 0.0166(7) 0.0285(9) -0.0106(6) -0.0083(6) 0.0034(6)
Co1 0.0111(4) 0.0184(4) 0.0362(5) 0.0101(3) -0.0027(3) -0.0029(3)
Co2 0.0166(4) 0.0132(3) 0.0189(4) -0.0003(3) -0.0058(3) -0.0030(3)
U1 0.00771(10) 0.01137(10) 0.03633(15) 0.00384(9) -0.00116(9) -0.00061(7)
U2 0.01184(10) 0.01162(10) 0.01727(12) -0.00336(8) -0.00253(8) 0.00033(7)
 
_geom_special_details
;
 All esds (except the esd in the dihedral angle between two l.s. planes)
 are estimated using the full covariance matrix.  The cell esds are taken
 into account individually in the estimation of esds in distances, angles
 and torsion angles; correlations between esds in cell parameters are only
 used when they are defined by crystal symmetry.  An approximate (isotropic)
 treatment of cell esds is used for estimating esds involving l.s. planes.
;
 
loop_
 _geom_bond_atom_site_label_1
 _geom_bond_atom_site_label_2
 _geom_bond_distance
 _geom_bond_site_symmetry_2
 _geom_bond_publ_flag
C1 C2 1.388(7) . ?
C1 C6 1.411(7) . ?
C1 N2 1.461(6) . ?
C2 C3 1.391(8) . ?
C2 H2 0.9500 . ?
C3 C4 1.390(9) . ?
C3 H3 0.9500 . ?
C4 C5 1.378(8) . ?
C4 H4 0.9500 . ?
C5 C6 1.400(8) . ?
C5 H5 0.9500 . ?
C6 N4 1.389(7) . ?
C7 C8 1.375(7) . ?
C7 C12 1.406(7) . ?
C7 N2 1.475(6) . ?
C8 C9 1.408(7) . ?
C8 H8 0.9500 . ?
C9 C10 1.380(8) . ?
C9 H9 0.9500 . ?
C10 C11 1.387(8) . ?
C10 H10 0.9500 . ?
C11 C12 1.413(7) . ?
C11 H11 0.9500 . ?
C12 N3 1.391(6) . ?
C13 C14 1.380(7) . ?
C13 C18 1.403(7) . ?
C13 N2 1.459(6) . ?
C14 C15 1.380(8) . ?
C14 H14 0.9500 . ?
C15 C16 1.382(8) . ?
C15 H15 0.9500 . ?
C16 C17 1.390(7) . ?
C16 H16 0.9500 . ?
C17 C18 1.399(7) . ?
C17 H17 0.9500 . ?
C18 N1 1.399(6) . ?
C19 N1 1.473(6) . ?
C19 P4 1.847(5) . ?
C19 H19A 0.9900 . ?
C19 H19B 0.9900 . ?
C20 C22 1.527(8) . ?
C20 C21 1.536(7) . ?
C20 P4 1.854(5) . ?
C20 H20 1.0000 . ?
C21 H21A 0.9800 . ?
C21 H21B 0.9800 . ?
C21 H21C 0.9800 . ?
C22 H22A 0.9800 . ?
C22 H22B 0.9800 . ?
C22 H22C 0.9800 . ?
C23 C105 1.529(8) . ?
C23 C24 1.536(7) . ?
C23 P4 1.854(5) . ?
C23 H23 1.0000 . ?
C24 H24A 0.9800 . ?
C24 H24B 0.9800 . ?
C24 H24C 0.9800 . ?
C25 N4 1.465(7) . ?
C25 P5 1.841(6) . ?
C25 H25A 0.9900 . ?
C25 H25B 0.9900 . ?
C26 C400 1.315(12) . ?
C26 C27 1.582(11) . ?
C26 P5 1.930(9) . ?
C26 H26 1.0000 . ?
C27 H27A 0.9800 . ?
C27 H27B 0.9800 . ?
C27 H27C 0.9800 . ?
C31 N3 1.458(6) . ?
C31 P6 1.842(5) . ?
C31 H31A 0.9900 . ?
C31 H31B 0.9900 . ?
C32 C33 1.525(8) . ?
C32 H32A 0.9800 . ?
C32 H32B 0.9800 . ?
C32 H32C 0.9800 . ?
C33 C34 1.526(8) . ?
C33 P6 1.856(5) . ?
C33 H33 1.0000 . ?
C34 H34A 0.9800 . ?
C34 H34B 0.9800 . ?
C34 H34C 0.9800 . ?
C35 C36 1.535(7) . ?
C35 H35A 0.9800 . ?
C35 H35B 0.9800 . ?
C35 H35C 0.9800 . ?
C36 C37 1.527(8) . ?
C36 P6 1.845(6) . ?
C36 H36 1.0000 . ?
C37 H37A 0.9800 . ?
C37 H37B 0.9800 . ?
C37 H37C 0.9800 . ?
C38 O3 1.160(6) . ?
C38 Co2 1.742(5) . ?
C38 U2 3.051(5) . ?
C39 O1 1.155(7) . ?
C39 Co2 1.764(6) . ?
C40 O2 1.156(7) . ?
C40 Co2 1.761(7) . ?
C41 O4 1.164(7) . ?
C41 Co1 1.743(7) . ?
C42 O6 1.157(7) . ?
C42 Co1 1.756(8) . ?
C43 N8 1.387(7) . ?
C43 C48 1.394(8) . ?
C43 C44 1.423(7) . ?
C44 C45 1.380(7) . ?
C44 N5 1.460(7) . ?
C45 C46 1.383(8) . ?
C45 H45 0.9500 . ?
C46 C47 1.381(8) . ?
C46 H46 0.9500 . ?
C47 C48 1.383(8) . ?
C47 H47 0.9500 . ?
C48 H48 0.9500 . ?
C49 C54 1.374(7) . ?
C49 C50 1.393(7) . ?
C49 H49 0.9500 . ?
C50 C51 1.383(8) . ?
C50 H50 0.9500 . ?
C51 C52 1.375(8) . ?
C51 H51 0.9500 . ?
C52 C53 1.408(7) . ?
C52 H52 0.9500 . ?
C53 C54 1.394(7) . ?
C53 N7 1.400(7) . ?
C54 N5 1.470(6) . ?
C55 C56 1.387(7) . ?
C55 C60 1.402(7) . ?
C55 N5 1.457(7) . ?
C56 C57 1.375(8) . ?
C56 H56 0.9500 . ?
C57 C58 1.392(7) . ?
C57 H57 0.9500 . ?
C58 C59 1.384(7) . ?
C58 H58 0.9500 . ?
C59 C60 1.404(7) . ?
C59 H59 0.9500 . ?
C60 N6 1.401(6) . ?
C61 N6 1.470(6) . ?
C61 P3 1.846(5) . ?
C61 H61A 0.9900 . ?
C61 H61B 0.9900 . ?
C62 C64 1.530(7) . ?
C62 C63 1.536(7) . ?
C62 P3 1.856(6) . ?
C62 H62 1.0000 . ?
C63 H63A 0.9800 . ?
C63 H63B 0.9800 . ?
C63 H63C 0.9800 . ?
C64 H64A 0.9800 . ?
C64 H64B 0.9800 . ?
C64 H64C 0.9800 . ?
C65 C67 1.527(7) . ?
C65 C66 1.531(8) . ?
C65 P3 1.863(5) . ?
C65 H65 1.0000 . ?
C66 H66A 0.9800 . ?
C66 H66B 0.9800 . ?
C66 H66C 0.9800 . ?
C67 H67A 0.9800 . ?
C67 H67B 0.9800 . ?
C67 H67C 0.9800 . ?
C68 N7 1.457(7) . ?
C68 P2 1.840(6) . ?
C68 H68A 0.9900 . ?
C68 H68B 0.9900 . ?
C69 C71 1.517(13) . ?
C69 C70 1.535(13) . ?
C69 P2 1.851(6) . ?
C69 H69 1.0000 . ?
C70 H70A 0.9800 . ?
C70 H70B 0.9800 . ?
C70 H70C 0.9800 . ?
C71 H71A 0.9800 . ?
C71 H71B 0.9800 . ?
C71 H71C 0.9800 . ?
C72 C73 1.520(8) . ?
C72 C74 1.538(8) . ?
C72 P2 1.842(7) . ?
C72 H72 1.0000 . ?
C73 H73A 0.9800 . ?
C73 H73B 0.9800 . ?
C73 H73C 0.9800 . ?
C74 H74A 0.9800 . ?
C74 H74B 0.9800 . ?
C74 H74C 0.9800 . ?
C75 N8 1.454(7) . ?
C75 P1 1.836(6) . ?
C75 H75A 0.9900 . ?
C75 H75B 0.9900 . ?
C76 C78 1.531(10) . ?
C76 C77 1.533(10) . ?
C76 P1 1.859(6) . ?
C76 H76 1.0000 . ?
C77 H77A 0.9800 . ?
C77 H77B 0.9800 . ?
C77 H77C 0.9800 . ?
C78 H78A 0.9800 . ?
C78 H78B 0.9800 . ?
C78 H78C 0.9800 . ?
C79 C80 1.553(10) . ?
C79 H79A 0.9800 . ?
C79 H79B 0.9800 . ?
C79 H79C 0.9800 . ?
C80 C81 1.463(10) . ?
C80 P1 1.884(7) . ?
C80 H80 1.0000 . ?
C81 H81A 0.9800 . ?
C81 H81B 0.9800 . ?
C81 H81C 0.9800 . ?
C83 C88 1.358(13) . ?
C83 C84 1.431(12) . ?
C83 H83 0.9500 . ?
C84 C86 1.388(11) . ?
C84 C85 1.426(13) . ?
C85 H85A 0.9800 . ?
C85 H85B 0.9800 . ?
C85 H85C 0.9800 . ?
C86 C89 1.400(13) . ?
C86 H86 0.9500 . ?
C87 C89 1.310(14) . ?
C87 C88 1.423(14) . ?
C87 H87 0.9500 . ?
C88 H88 0.9500 . ?
C89 H89 0.9500 . ?
C90 C93 1.375(17) . ?
C90 C91 1.393(17) . ?
C90 H90 0.9500 . ?
C91 C92 1.344(17) . ?
C91 H91 0.9500 . ?
C92 C94 1.353(17) . ?
C92 H92 0.9500 . ?
C93 C95 1.333(18) . ?
C93 H93 0.9500 . ?
C94 C95 1.55(2) . ?
C94 H94 0.9500 . ?
C95 C96 1.331(16) . ?
C96 H96A 0.9800 . ?
C96 H96B 0.9800 . ?
C96 H96C 0.9800 . ?
C97 C102 1.358(13) . ?
C97 C98 1.378(12) . ?
C97 H97 0.9500 . ?
C98 C99 1.270(12) . ?
C98 H98 0.9500 . ?
C99 C100 1.512(16) . ?
C99 H99 0.9500 . ?
C100 C101 1.343(15) . ?
C100 H100 0.9500 . ?
C101 C102 1.474(15) . ?
C101 H101 0.9500 . ?
C102 C103 1.392(17) . ?
C103 H10A 0.9800 . ?
C103 H10B 0.9800 . ?
C103 H10C 0.9800 . ?
C104 O5 1.164(7) . ?
C104 Co1 1.762(6) . ?
C105 H10D 0.9800 . ?
C105 H10E 0.9800 . ?
C105 H10F 0.9800 . ?
C300 C302 1.669(14) . ?
C300 H30A 0.9800 . ?
C300 H30B 0.9800 . ?
C300 H30C 0.9800 . ?
C302 C304 1.332(13) . ?
C302 P5 1.864(10) . ?
C302 H302 1.0000 . ?
C304 H30D 0.9800 . ?
C304 H30E 0.9800 . ?
C304 H30F 0.9800 . ?
C400 H40A 0.9800 . ?
C400 H40B 0.9800 . ?
C400 H40C 0.9800 . ?
N1 U2 2.287(4) . ?
N2 U2 2.568(4) . ?
N3 U2 2.304(4) . ?
N4 U2 2.258(4) . ?
N5 U1 2.576(4) . ?
N6 U1 2.287(4) . ?
N7 U1 2.298(5) . ?
N8 U1 2.276(5) . ?
P1 U1 3.2490(17) . ?
P2 U1 3.0754(18) . ?
P3 Co1 2.1960(15) . ?
P4 Co2 2.1997(15) . ?
P5 U2 3.1743(15) . ?
P6 U2 3.1046(14) . ?
Co1 U1 3.0263(7) . ?
Co2 U2 3.0375(7) . ?
 
loop_
 _geom_angle_atom_site_label_1
 _geom_angle_atom_site_label_2
 _geom_angle_atom_site_label_3
 _geom_angle
 _geom_angle_site_symmetry_1
 _geom_angle_site_symmetry_3
 _geom_angle_publ_flag
C2 C1 C6 121.2(5) . . ?
C2 C1 N2 124.0(5) . . ?
C6 C1 N2 114.8(4) . . ?
C1 C2 C3 119.6(6) . . ?
C1 C2 H2 120.2 . . ?
C3 C2 H2 120.2 . . ?
C4 C3 C2 119.7(5) . . ?
C4 C3 H3 120.2 . . ?
C2 C3 H3 120.2 . . ?
C5 C4 C3 120.8(5) . . ?
C5 C4 H4 119.6 . . ?
C3 C4 H4 119.6 . . ?
C4 C5 C6 120.8(6) . . ?
C4 C5 H5 119.6 . . ?
C6 C5 H5 119.6 . . ?
N4 C6 C5 126.4(5) . . ?
N4 C6 C1 115.7(5) . . ?
C5 C6 C1 117.9(5) . . ?
C8 C7 C12 122.1(4) . . ?
C8 C7 N2 123.4(4) . . ?
C12 C7 N2 114.4(4) . . ?
C7 C8 C9 119.8(5) . . ?
C7 C8 H8 120.1 . . ?
C9 C8 H8 120.1 . . ?
C10 C9 C8 119.1(5) . . ?
C10 C9 H9 120.4 . . ?
C8 C9 H9 120.4 . . ?
C9 C10 C11 121.1(5) . . ?
C9 C10 H10 119.5 . . ?
C11 C10 H10 119.5 . . ?
C10 C11 C12 120.7(5) . . ?
C10 C11 H11 119.6 . . ?
C12 C11 H11 119.6 . . ?
N3 C12 C7 117.5(4) . . ?
N3 C12 C11 125.4(5) . . ?
C7 C12 C11 117.0(5) . . ?
C14 C13 C18 121.4(5) . . ?
C14 C13 N2 122.5(5) . . ?
C18 C13 N2 116.1(4) . . ?
C15 C14 C13 120.6(5) . . ?
C15 C14 H14 119.7 . . ?
C13 C14 H14 119.7 . . ?
C14 C15 C16 119.0(5) . . ?
C14 C15 H15 120.5 . . ?
C16 C15 H15 120.5 . . ?
C15 C16 C17 120.8(5) . . ?
C15 C16 H16 119.6 . . ?
C17 C16 H16 119.6 . . ?
C16 C17 C18 120.7(5) . . ?
C16 C17 H17 119.6 . . ?
C18 C17 H17 119.6 . . ?
C17 C18 N1 125.2(5) . . ?
C17 C18 C13 117.3(4) . . ?
N1 C18 C13 117.6(5) . . ?
N1 C19 P4 110.1(3) . . ?
N1 C19 H19A 109.6 . . ?
P4 C19 H19A 109.6 . . ?
N1 C19 H19B 109.6 . . ?
P4 C19 H19B 109.6 . . ?
H19A C19 H19B 108.1 . . ?
C22 C20 C21 110.5(5) . . ?
C22 C20 P4 111.0(3) . . ?
C21 C20 P4 115.9(4) . . ?
C22 C20 H20 106.3 . . ?
C21 C20 H20 106.3 . . ?
P4 C20 H20 106.3 . . ?
C20 C21 H21A 109.5 . . ?
C20 C21 H21B 109.5 . . ?
H21A C21 H21B 109.5 . . ?
C20 C21 H21C 109.5 . . ?
H21A C21 H21C 109.5 . . ?
H21B C21 H21C 109.5 . . ?
C20 C22 H22A 109.5 . . ?
C20 C22 H22B 109.5 . . ?
H22A C22 H22B 109.5 . . ?
C20 C22 H22C 109.5 . . ?
H22A C22 H22C 109.5 . . ?
H22B C22 H22C 109.5 . . ?
C105 C23 C24 110.7(5) . . ?
C105 C23 P4 111.7(3) . . ?
C24 C23 P4 111.2(4) . . ?
C105 C23 H23 107.6 . . ?
C24 C23 H23 107.6 . . ?
P4 C23 H23 107.6 . . ?
C23 C24 H24A 109.5 . . ?
C23 C24 H24B 109.5 . . ?
H24A C24 H24B 109.5 . . ?
C23 C24 H24C 109.5 . . ?
H24A C24 H24C 109.5 . . ?
H24B C24 H24C 109.5 . . ?
N4 C25 P5 102.6(4) . . ?
N4 C25 H25A 111.2 . . ?
P5 C25 H25A 111.2 . . ?
N4 C25 H25B 111.2 . . ?
P5 C25 H25B 111.2 . . ?
H25A C25 H25B 109.2 . . ?
C400 C26 C27 113.1(8) . . ?
C400 C26 P5 118.8(8) . . ?
C27 C26 P5 105.0(7) . . ?
C400 C26 H26 106.4 . . ?
C27 C26 H26 106.4 . . ?
P5 C26 H26 106.4 . . ?
C26 C27 H27A 109.5 . . ?
C26 C27 H27B 109.5 . . ?
H27A C27 H27B 109.5 . . ?
C26 C27 H27C 109.5 . . ?
H27A C27 H27C 109.5 . . ?
H27B C27 H27C 109.5 . . ?
N3 C31 P6 101.6(3) . . ?
N3 C31 H31A 111.5 . . ?
P6 C31 H31A 111.5 . . ?
N3 C31 H31B 111.5 . . ?
P6 C31 H31B 111.5 . . ?
H31A C31 H31B 109.3 . . ?
C33 C32 H32A 109.5 . . ?
C33 C32 H32B 109.5 . . ?
H32A C32 H32B 109.5 . . ?
C33 C32 H32C 109.5 . . ?
H32A C32 H32C 109.5 . . ?
H32B C32 H32C 109.5 . . ?
C32 C33 C34 111.7(5) . . ?
C32 C33 P6 110.1(4) . . ?
C34 C33 P6 113.1(4) . . ?
C32 C33 H33 107.2 . . ?
C34 C33 H33 107.2 . . ?
P6 C33 H33 107.2 . . ?
C33 C34 H34A 109.5 . . ?
C33 C34 H34B 109.5 . . ?
H34A C34 H34B 109.5 . . ?
C33 C34 H34C 109.5 . . ?
H34A C34 H34C 109.5 . . ?
H34B C34 H34C 109.5 . . ?
C36 C35 H35A 109.5 . . ?
C36 C35 H35B 109.5 . . ?
H35A C35 H35B 109.5 . . ?
C36 C35 H35C 109.5 . . ?
H35A C35 H35C 109.5 . . ?
H35B C35 H35C 109.5 . . ?
C37 C36 C35 111.4(5) . . ?
C37 C36 P6 110.7(4) . . ?
C35 C36 P6 109.1(4) . . ?
C37 C36 H36 108.5 . . ?
C35 C36 H36 108.5 . . ?
P6 C36 H36 108.5 . . ?
C36 C37 H37A 109.5 . . ?
C36 C37 H37B 109.5 . . ?
H37A C37 H37B 109.5 . . ?
C36 C37 H37C 109.5 . . ?
H37A C37 H37C 109.5 . . ?
H37B C37 H37C 109.5 . . ?
O3 C38 Co2 170.6(4) . . ?
O3 C38 U2 116.2(3) . . ?
Co2 C38 U2 72.94(16) . . ?
O1 C39 Co2 179.3(7) . . ?
O2 C40 Co2 171.4(5) . . ?
O4 C41 Co1 169.2(5) . . ?
O6 C42 Co1 171.1(5) . . ?
N8 C43 C48 125.8(5) . . ?
N8 C43 C44 115.9(5) . . ?
C48 C43 C44 118.3(5) . . ?
C45 C44 C43 120.0(5) . . ?
C45 C44 N5 124.8(5) . . ?
C43 C44 N5 115.2(4) . . ?
C44 C45 C46 120.6(5) . . ?
C44 C45 H45 119.7 . . ?
C46 C45 H45 119.7 . . ?
C47 C46 C45 119.6(5) . . ?
C47 C46 H46 120.2 . . ?
C45 C46 H46 120.2 . . ?
C46 C47 C48 120.9(6) . . ?
C46 C47 H47 119.5 . . ?
C48 C47 H47 119.5 . . ?
C47 C48 C43 120.4(6) . . ?
C47 C48 H48 119.8 . . ?
C43 C48 H48 119.8 . . ?
C54 C49 C50 119.8(5) . . ?
C54 C49 H49 120.1 . . ?
C50 C49 H49 120.1 . . ?
C51 C50 C49 118.8(5) . . ?
C51 C50 H50 120.6 . . ?
C49 C50 H50 120.6 . . ?
C52 C51 C50 121.4(5) . . ?
C52 C51 H51 119.3 . . ?
C50 C51 H51 119.3 . . ?
C51 C52 C53 120.6(5) . . ?
C51 C52 H52 119.7 . . ?
C53 C52 H52 119.7 . . ?
C54 C53 N7 117.9(4) . . ?
C54 C53 C52 117.1(5) . . ?
N7 C53 C52 124.9(5) . . ?
C49 C54 C53 122.2(4) . . ?
C49 C54 N5 123.2(5) . . ?
C53 C54 N5 114.4(4) . . ?
C56 C55 C60 121.0(5) . . ?
C56 C55 N5 122.3(4) . . ?
C60 C55 N5 116.7(4) . . ?
C57 C56 C55 120.8(5) . . ?
C57 C56 H56 119.6 . . ?
C55 C56 H56 119.6 . . ?
C56 C57 C58 119.2(5) . . ?
C56 C57 H57 120.4 . . ?
C58 C57 H57 120.4 . . ?
C59 C58 C57 120.3(5) . . ?
C59 C58 H58 119.8 . . ?
C57 C58 H58 119.8 . . ?
C58 C59 C60 121.1(5) . . ?
C58 C59 H59 119.4 . . ?
C60 C59 H59 119.4 . . ?
N6 C60 C55 117.5(5) . . ?
N6 C60 C59 125.1(4) . . ?
C55 C60 C59 117.4(4) . . ?
N6 C61 P3 110.2(4) . . ?
N6 C61 H61A 109.6 . . ?
P3 C61 H61A 109.6 . . ?
N6 C61 H61B 109.6 . . ?
P3 C61 H61B 109.6 . . ?
H61A C61 H61B 108.1 . . ?
C64 C62 C63 110.7(5) . . ?
C64 C62 P3 111.2(4) . . ?
C63 C62 P3 111.7(4) . . ?
C64 C62 H62 107.7 . . ?
C63 C62 H62 107.7 . . ?
P3 C62 H62 107.7 . . ?
C62 C63 H63A 109.5 . . ?
C62 C63 H63B 109.5 . . ?
H63A C63 H63B 109.5 . . ?
C62 C63 H63C 109.5 . . ?
H63A C63 H63C 109.5 . . ?
H63B C63 H63C 109.5 . . ?
C62 C64 H64A 109.5 . . ?
C62 C64 H64B 109.5 . . ?
H64A C64 H64B 109.5 . . ?
C62 C64 H64C 109.5 . . ?
H64A C64 H64C 109.5 . . ?
H64B C64 H64C 109.5 . . ?
C67 C65 C66 111.1(5) . . ?
C67 C65 P3 115.2(4) . . ?
C66 C65 P3 110.9(4) . . ?
C67 C65 H65 106.3 . . ?
C66 C65 H65 106.3 . . ?
P3 C65 H65 106.3 . . ?
C65 C66 H66A 109.5 . . ?
C65 C66 H66B 109.5 . . ?
H66A C66 H66B 109.5 . . ?
C65 C66 H66C 109.5 . . ?
H66A C66 H66C 109.5 . . ?
H66B C66 H66C 109.5 . . ?
C65 C67 H67A 109.5 . . ?
C65 C67 H67B 109.5 . . ?
H67A C67 H67B 109.5 . . ?
C65 C67 H67C 109.5 . . ?
H67A C67 H67C 109.5 . . ?
H67B C67 H67C 109.5 . . ?
N7 C68 P2 101.5(4) . . ?
N7 C68 H68A 111.5 . . ?
P2 C68 H68A 111.5 . . ?
N7 C68 H68B 111.5 . . ?
P2 C68 H68B 111.5 . . ?
H68A C68 H68B 109.3 . . ?
C71 C69 C70 112.6(7) . . ?
C71 C69 P2 112.6(6) . . ?
C70 C69 P2 110.2(6) . . ?
C71 C69 H69 107.0 . . ?
C70 C69 H69 107.0 . . ?
P2 C69 H69 107.0 . . ?
C69 C70 H70A 109.5 . . ?
C69 C70 H70B 109.5 . . ?
H70A C70 H70B 109.5 . . ?
C69 C70 H70C 109.5 . . ?
H70A C70 H70C 109.5 . . ?
H70B C70 H70C 109.5 . . ?
C69 C71 H71A 109.5 . . ?
C69 C71 H71B 109.5 . . ?
H71A C71 H71B 109.5 . . ?
C69 C71 H71C 109.5 . . ?
H71A C71 H71C 109.5 . . ?
H71B C71 H71C 109.5 . . ?
C73 C72 C74 110.3(5) . . ?
C73 C72 P2 111.2(4) . . ?
C74 C72 P2 110.3(5) . . ?
C73 C72 H72 108.3 . . ?
C74 C72 H72 108.3 . . ?
P2 C72 H72 108.3 . . ?
C72 C73 H73A 109.5 . . ?
C72 C73 H73B 109.5 . . ?
H73A C73 H73B 109.5 . . ?
C72 C73 H73C 109.5 . . ?
H73A C73 H73C 109.5 . . ?
H73B C73 H73C 109.5 . . ?
C72 C74 H74A 109.5 . . ?
C72 C74 H74B 109.5 . . ?
H74A C74 H74B 109.5 . . ?
C72 C74 H74C 109.5 . . ?
H74A C74 H74C 109.5 . . ?
H74B C74 H74C 109.5 . . ?
N8 C75 P1 102.5(4) . . ?
N8 C75 H75A 111.3 . . ?
P1 C75 H75A 111.3 . . ?
N8 C75 H75B 111.3 . . ?
P1 C75 H75B 111.3 . . ?
H75A C75 H75B 109.2 . . ?
C78 C76 C77 110.9(7) . . ?
C78 C76 P1 109.0(4) . . ?
C77 C76 P1 110.9(5) . . ?
C78 C76 H76 108.7 . . ?
C77 C76 H76 108.7 . . ?
P1 C76 H76 108.7 . . ?
C76 C77 H77A 109.5 . . ?
C76 C77 H77B 109.5 . . ?
H77A C77 H77B 109.5 . . ?
C76 C77 H77C 109.5 . . ?
H77A C77 H77C 109.5 . . ?
H77B C77 H77C 109.5 . . ?
C76 C78 H78A 109.5 . . ?
C76 C78 H78B 109.5 . . ?
H78A C78 H78B 109.5 . . ?
C76 C78 H78C 109.5 . . ?
H78A C78 H78C 109.5 . . ?
H78B C78 H78C 109.5 . . ?
C80 C79 H79A 109.5 . . ?
C80 C79 H79B 109.5 . . ?
H79A C79 H79B 109.5 . . ?
C80 C79 H79C 109.5 . . ?
H79A C79 H79C 109.5 . . ?
H79B C79 H79C 109.5 . . ?
C81 C80 C79 111.2(6) . . ?
C81 C80 P1 113.9(6) . . ?
C79 C80 P1 114.1(5) . . ?
C81 C80 H80 105.6 . . ?
C79 C80 H80 105.6 . . ?
P1 C80 H80 105.6 . . ?
C80 C81 H81A 109.5 . . ?
C80 C81 H81B 109.5 . . ?
H81A C81 H81B 109.5 . . ?
C80 C81 H81C 109.5 . . ?
H81A C81 H81C 109.5 . . ?
H81B C81 H81C 109.5 . . ?
C88 C83 C84 117.2(10) . . ?
C88 C83 H83 121.4 . . ?
C84 C83 H83 121.4 . . ?
C86 C84 C85 124.3(10) . . ?
C86 C84 C83 118.0(9) . . ?
C85 C84 C83 117.7(10) . . ?
C84 C85 H85A 109.5 . . ?
C84 C85 H85B 109.5 . . ?
H85A C85 H85B 109.5 . . ?
C84 C85 H85C 109.5 . . ?
H85A C85 H85C 109.5 . . ?
H85B C85 H85C 109.5 . . ?
C84 C86 C89 120.6(9) . . ?
C84 C86 H86 119.7 . . ?
C89 C86 H86 119.7 . . ?
C89 C87 C88 115.7(11) . . ?
C89 C87 H87 122.2 . . ?
C88 C87 H87 122.2 . . ?
C83 C88 C87 125.1(10) . . ?
C83 C88 H88 117.5 . . ?
C87 C88 H88 117.5 . . ?
C87 C89 C86 123.5(11) . . ?
C87 C89 H89 118.3 . . ?
C86 C89 H89 118.3 . . ?
C93 C90 C91 120.6(16) . . ?
C93 C90 H90 119.7 . . ?
C91 C90 H90 119.7 . . ?
C92 C91 C90 112.1(15) . . ?
C92 C91 H91 123.9 . . ?
C90 C91 H91 124.0 . . ?
C91 C92 C94 133.2(16) . . ?
C91 C92 H92 113.4 . . ?
C94 C92 H92 113.4 . . ?
C95 C93 C90 128.1(15) . . ?
C95 C93 H93 116.0 . . ?
C90 C93 H93 116.0 . . ?
C92 C94 C95 112.8(15) . . ?
C92 C94 H94 123.6 . . ?
C95 C94 H94 123.6 . . ?
C96 C95 C93 130(2) . . ?
C96 C95 C94 116.5(19) . . ?
C93 C95 C94 113.2(14) . . ?
C95 C96 H96A 109.5 . . ?
C95 C96 H96B 109.5 . . ?
H96A C96 H96B 109.5 . . ?
C95 C96 H96C 109.5 . . ?
H96A C96 H96C 109.5 . . ?
H96B C96 H96C 109.5 . . ?
C102 C97 C98 122.8(10) . . ?
C102 C97 H97 118.6 . . ?
C98 C97 H97 118.6 . . ?
C99 C98 C97 125.8(12) . . ?
C99 C98 H98 117.1 . . ?
C97 C98 H98 117.1 . . ?
C98 C99 C100 111.7(11) . . ?
C98 C99 H99 124.2 . . ?
C100 C99 H99 124.2 . . ?
C101 C100 C99 128.0(11) . . ?
C101 C100 H100 116.0 . . ?
C99 C100 H100 116.0 . . ?
C100 C101 C102 113.2(12) . . ?
C100 C101 H101 123.4 . . ?
C102 C101 H101 123.4 . . ?
C97 C102 C103 127.4(13) . . ?
C97 C102 C101 118.4(11) . . ?
C103 C102 C101 114.0(12) . . ?
C102 C103 H10A 109.5 . . ?
C102 C103 H10B 109.5 . . ?
H10A C103 H10B 109.5 . . ?
C102 C103 H10C 109.5 . . ?
H10A C103 H10C 109.5 . . ?
H10B C103 H10C 109.5 . . ?
O5 C104 Co1 177.6(6) . . ?
C23 C105 H10D 109.5 . . ?
C23 C105 H10E 109.5 . . ?
H10D C105 H10E 109.5 . . ?
C23 C105 H10F 109.5 . . ?
H10D C105 H10F 109.5 . . ?
H10E C105 H10F 109.5 . . ?
C302 C300 H30A 109.5 . . ?
C302 C300 H30B 109.5 . . ?
H30A C300 H30B 109.5 . . ?
C302 C300 H30C 109.5 . . ?
H30A C300 H30C 109.5 . . ?
H30B C300 H30C 109.5 . . ?
C304 C302 C300 107.1(9) . . ?
C304 C302 P5 111.2(9) . . ?
C300 C302 P5 110.5(7) . . ?
C304 C302 H302 109.3 . . ?
C300 C302 H302 109.3 . . ?
P5 C302 H302 109.3 . . ?
C302 C304 H30D 109.5 . . ?
C302 C304 H30E 109.5 . . ?
H30D C304 H30E 109.5 . . ?
C302 C304 H30F 109.5 . . ?
H30D C304 H30F 109.5 . . ?
H30E C304 H30F 109.5 . . ?
C26 C400 H40A 109.5 . . ?
C26 C400 H40B 109.5 . . ?
H40A C400 H40B 109.5 . . ?
C26 C400 H40C 109.5 . . ?
H40A C400 H40C 109.5 . . ?
H40B C400 H40C 109.5 . . ?
C18 N1 C19 114.1(4) . . ?
C18 N1 U2 118.6(3) . . ?
C19 N1 U2 125.5(3) . . ?
C13 N2 C1 114.9(4) . . ?
C13 N2 C7 111.6(4) . . ?
C1 N2 C7 112.2(4) . . ?
C13 N2 U2 107.7(3) . . ?
C1 N2 U2 104.1(3) . . ?
C7 N2 U2 105.5(3) . . ?
C12 N3 C31 117.9(4) . . ?
C12 N3 U2 117.6(3) . . ?
C31 N3 U2 122.6(3) . . ?
C6 N4 C25 119.2(4) . . ?
C6 N4 U2 117.2(3) . . ?
C25 N4 U2 122.3(3) . . ?
C55 N5 C44 114.2(4) . . ?
C55 N5 C54 111.7(4) . . ?
C44 N5 C54 112.4(4) . . ?
C55 N5 U1 108.2(3) . . ?
C44 N5 U1 103.8(3) . . ?
C54 N5 U1 105.8(3) . . ?
C60 N6 C61 114.2(4) . . ?
C60 N6 U1 119.5(3) . . ?
C61 N6 U1 125.2(3) . . ?
C53 N7 C68 118.3(4) . . ?
C53 N7 U1 117.9(4) . . ?
C68 N7 U1 122.0(3) . . ?
C43 N8 C75 119.3(5) . . ?
C43 N8 U1 116.5(4) . . ?
C75 N8 U1 123.4(4) . . ?
C75 P1 C76 103.9(3) . . ?
C75 P1 C80 98.4(3) . . ?
C76 P1 C80 106.4(3) . . ?
C75 P1 U1 75.5(2) . . ?
C76 P1 U1 136.0(2) . . ?
C80 P1 U1 117.3(2) . . ?
C68 P2 C72 103.7(3) . . ?
C68 P2 C69 105.4(3) . . ?
C72 P2 C69 105.4(4) . . ?
C68 P2 U1 80.4(2) . . ?
C72 P2 U1 120.73(18) . . ?
C69 P2 U1 131.0(3) . . ?
C61 P3 C62 100.7(2) . . ?
C61 P3 C65 100.8(2) . . ?
C62 P3 C65 103.2(2) . . ?
C61 P3 Co1 123.52(17) . . ?
C62 P3 Co1 113.88(19) . . ?
C65 P3 Co1 112.16(17) . . ?
C19 P4 C23 100.6(2) . . ?
C19 P4 C20 101.0(2) . . ?
C23 P4 C20 103.3(2) . . ?
C19 P4 Co2 122.86(16) . . ?
C23 P4 Co2 114.75(19) . . ?
C20 P4 Co2 111.79(17) . . ?
C25 P5 C302 101.8(4) . . ?
C25 P5 C26 101.5(3) . . ?
C302 P5 C26 104.4(5) . . ?
C25 P5 U2 76.69(18) . . ?
C302 P5 U2 130.8(3) . . ?
C26 P5 U2 124.3(3) . . ?
C31 P6 C36 105.2(3) . . ?
C31 P6 C33 104.9(3) . . ?
C36 P6 C33 104.6(3) . . ?
C31 P6 U2 80.05(17) . . ?
C36 P6 U2 118.83(18) . . ?
C33 P6 U2 133.55(19) . . ?
C41 Co1 C42 121.2(3) . . ?
C41 Co1 C104 99.5(3) . . ?
C42 Co1 C104 102.6(3) . . ?
C41 Co1 P3 122.6(2) . . ?
C42 Co1 P3 109.31(19) . . ?
C104 Co1 P3 94.20(19) . . ?
C41 Co1 U1 76.40(18) . . ?
C42 Co1 U1 83.09(19) . . ?
C104 Co1 U1 174.2(3) . . ?
P3 Co1 U1 84.79(4) . . ?
C38 Co2 C40 122.9(3) . . ?
C38 Co2 C39 99.7(2) . . ?
C40 Co2 C39 102.4(3) . . ?
C38 Co2 P4 121.45(18) . . ?
C40 Co2 P4 108.21(19) . . ?
C39 Co2 P4 94.84(18) . . ?
C38 Co2 U2 73.82(15) . . ?
C40 Co2 U2 84.78(18) . . ?
C39 Co2 U2 172.3(2) . . ?
P4 Co2 U2 85.30(4) . . ?
N8 U1 N6 114.92(15) . . ?
N8 U1 N7 101.15(16) . . ?
N6 U1 N7 98.87(16) . . ?
N8 U1 N5 66.07(15) . . ?
N6 U1 N5 67.33(13) . . ?
N7 U1 N5 66.23(14) . . ?
N8 U1 Co1 99.33(11) . . ?
N6 U1 Co1 87.46(10) . . ?
N7 U1 Co1 153.51(11) . . ?
N5 U1 Co1 138.61(9) . . ?
N8 U1 P2 142.76(11) . . ?
N6 U1 P2 97.99(12) . . ?
N7 U1 P2 54.72(11) . . ?
N5 U1 P2 115.97(10) . . ?
Co1 U1 P2 99.04(3) . . ?
N8 U1 P1 52.04(11) . . ?
N6 U1 P1 166.96(11) . . ?
N7 U1 P1 84.69(13) . . ?
N5 U1 P1 103.27(10) . . ?
Co1 U1 P1 94.92(3) . . ?
P2 U1 P1 94.31(5) . . ?
N4 U2 N1 113.32(15) . . ?
N4 U2 N3 101.41(15) . . ?
N1 U2 N3 99.87(15) . . ?
N4 U2 N2 65.76(14) . . ?
N1 U2 N2 67.13(13) . . ?
N3 U2 N2 66.29(13) . . ?
N4 U2 Co2 98.08(11) . . ?
N1 U2 Co2 86.76(10) . . ?
N3 U2 Co2 154.80(10) . . ?
N2 U2 Co2 137.46(9) . . ?
N4 U2 C38 114.33(15) . . ?
N1 U2 C38 105.02(14) . . ?
N3 U2 C38 122.30(14) . . ?
N2 U2 C38 170.11(13) . . ?
Co2 U2 C38 33.25(10) . . ?
N4 U2 P6 143.60(12) . . ?
N1 U2 P6 98.61(11) . . ?
N3 U2 P6 54.29(11) . . ?
N2 U2 P6 115.36(9) . . ?
Co2 U2 P6 100.82(3) . . ?
C38 U2 P6 70.89(11) . . ?
N4 U2 P5 53.86(11) . . ?
N1 U2 P5 165.81(11) . . ?
N3 U2 P5 89.54(11) . . ?
N2 U2 P5 107.86(9) . . ?
Co2 U2 P5 89.18(3) . . ?
C38 U2 P5 78.26(10) . . ?
P6 U2 P5 95.50(4) . . ?
 
_diffrn_measured_fraction_theta_max    0.997
_diffrn_reflns_theta_full              25.00
_diffrn_measured_fraction_theta_full   1.000
_refine_diff_density_max    2.477
_refine_diff_density_min   -2.785
_refine_diff_density_rms    0.130
# SQUEEZE RESULTS (APPEND TO CIF)
# Note: Data are Listed for all Voids in the P1 Unit Cell
# i.e. Centre of Gravity, Solvent Accessible Volume,
# Recovered number of Electrons in the Void and
# Details about the Squeezed Material
loop_
  _platon_squeeze_void_nr
  _platon_squeeze_void_average_x
  _platon_squeeze_void_average_y
  _platon_squeeze_void_average_z
  _platon_squeeze_void_volume
  _platon_squeeze_void_count_electrons
  _platon_squeeze_void_content
   1  0.000  0.000  0.000       197        54 ' '
   2  0.000  0.000  0.500       187        54 ' '
   3  0.372  0.327  0.917        10         1 ' '
   4  0.628  0.673  0.083        10         1 ' '
_platon_squeeze_details
;
;
